# Supplementary material for: Predicting cancer cell invasion by single-cell physical phenotyping
Source: Royal Society of Chemistry journal article supplement (doi:10.1039/c7ib00222j), 2018-03-22
Supplement: c7ib00222j1.xlsx [file c7ib00222j1.xlsx]

## Sheet: PDAC
Cell Line	Diameter	Strain	Transit Time	Entry Time	Elastic Modulus	Beta
	um	-	ms	ms	Pa	-
HPDE	21.2902	0.326577	3.5	2	1599.16	0.228664
HPDE	24.7215	0.439215	3	4.5	379	0.454958
HPDE	25.7063	0.415057	7.5	10	2686.96	0.125744
HPDE	20.4358	0.368605	3.5	2	12.2393	0.98175
HPDE	25.4824	0.50177	10.5	10.5	610.932	0.409599
HPDE	23.48	0.409679	18.5	6.5	661.872	0.385148
HPDE	12.1005	0.483375	2.5	3.5	56.2042	0.765261
HPDE	23.9631	0.48274	17.5	15.5	887.578	0.349795
HPDE	25.5074	0.458604	14.5	22.5	2696.65	0.140277
HPDE	20.3108	0.413447	4	2.5	65.771	0.716462
HPDE	26.7023	0.443374	8.5	12	1515.69	0.236113
HPDE	24.7473	0.40409	29	30.5	2899.22	0.166599
HPDE	22.9036	0.399067	4.5	4	107.569	0.695099
HPDE	20.8674	0.495428	7.5	6.5	200.48	0.576345
HPDE	21.9962	0.458129	11.5	9.5	979.986	0.324351
HPDE	20.4046	0.466027	10.5	9.5	1084.03	0.301671
HPDE	25.5074	0.350985	7	8.5	2501.05	0.174093
HPDE	22.2551	0.389854	4	3.5	703.616	0.342312
HPDE	21.1703	0.502584	24.5	27.5	2202.12	0.172827
HPDE	24.7215	0.509423	89	86	3531.09	0.137904
HPDE	24.7215	0.443685	9.5	10	1408.31	0.226788
HPDE	20.6219	0.40436	5	2.5	20.3189	0.921127
HPDE	21.11	0.445898	10	9.5	446.548	0.49357
HPDE	23.9897	0.424786	6.5	5.5	306.155	0.530975
HPDE	26.6068	0.443449	13	17	2111.57	0.195934
HPDE	18.4379	0.352814	3	2	368.069	0.450935
HPDE	25.4073	0.431932	21	22	2753.13	0.119247
HPDE	26.8924	0.486135	48	54.5	3258.15	0.126382
HPDE	18.1245	0.578398	4	5	216.596	0.523422
HPDE	21.2003	0.363239	6.5	4.5	240.217	0.566152
HPDE	22.9591	0.37766	13.5	9	532.573	0.462794
HPDE	21.7926	0.355449	22	26	794.482	0.483652
HPDE	22.7082	0.325706	5.5	4.5	3544.24	0.10729
HPDE	26.1726	0.319116	21	20.5	2832.36	0.110554
HPDE	22.8758	0.35643	92	89	4668.74	0.096032
HPDE	24.2536	0.289366	8.5	8.5	2961.43	0.187702
HPDE	31.4533	0.554605	19.5	28	2363.99	0.133703
HPDE	26.916	0.461964	14	17	1845.28	0.235449
HPDE	25.0795	0.377593	4.5	4.5	790.312	0.354752
HPDE	23.7764	0.348826	8	8	1540.19	0.310619
HPDE	19.7063	0.253852	2.5	2	117.706	0.666645
HPDE	29.2292	0.463881	10	24.5	2874.26	0.106054
HPDE	22.3692	0.309259	6	5	943.166	0.367058
HPDE	24.6183	0.44753	4	3	144.866	0.583031
HPDE	26.3423	0.408132	5.5	6.5	995.235	0.314659
HPDE	25.8051	0.387275	452	447	5016.63	0.0932646
HPDE	15.757	0.361668	9.5	8	1755.29	0.243853
HPDE	17.6619	0.509114	7.5	15	1787.9	0.183452
HPDE	26.0507	0.665412	1.5	4.5	101.978	0.630282
HPDE	25.0032	0.328476	5.5	6.5	1307.7	0.281468
HPDE	26.3664	0.455527	8	10.5	1183.39	0.285444
HPDE	21.9962	0.59984	20	14.5	587.017	0.457097
HPDE	21.2902	0.401986	15.5	9.5	407.883	0.556775
HPDE	23.6152	0.417906	10.5	9.5	953.235	0.357661
HPDE	24.2798	0.456891	7	4.5	1417.36	0.221421
HPDE	22.3123	0.307157	6	4.5	297.236	0.588094
HPDE	22.2265	0.395504	21.5	18	1310.97	0.318681
HPDE	15.0121	0.470954	46	48	2314.92	0.221959
HPDE	13.159	0.308038	10	11	2050.46	0.212432
HPDE	26.4388	0.507189	6	7.5	1309.44	0.24398
HPDE	13.5406	0.480522	11	7.5	664.605	0.385349
HPDE	19.4788	0.384384	16	11	1069.71	0.326187
HPDE	23.3441	0.424746	196	192.5	4553.46	0.085814
HPDE	19.0826	0.373942	5	4	277.239	0.546669
HPDE	15.1808	0.531821	14.5	14.5	1092.12	0.30044
HPDE	22.1978	0.407785	83	80.5	3895.98	0.0743003
HPDE	23.2073	0.255111	39.5	37.5	4640.98	0.144733
HPDE	24.122	0.282983	4	3.5	1835.31	0.245573
HPDE	24.3322	0.532569	67	63	2969.45	0.14802
HPDE	12.4634	0.529285	5.5	15.5	1472.95	0.225342
HPDE	24.2798	0.502662	758	760.5	4530.91	0.0808129
HPDE	25.3823	0.378307	74	81.5	4258.09	0.142511
HPDE	22.1404	0.235611	25.5	13.5	2939.95	0.264095
HPDE	24.7987	0.383764	259.5	248.5	4798.84	0.1119
HPDE	22.0251	0.325783	12.5	10.5	911.899	0.413178
HPDE	25.0032	0.41485	246.5	241.5	4313.36	0.153261
HPDE	20.8979	0.381035	9	6.5	943.326	0.348868
HPDE	23.8566	0.325862	209	185.5	5240.07	0.0985719
HPDE	21.1703	0.226343	6	4	104.456	0.80633
HPDE	23.696	0.501531	131.5	129.5	3236.51	0.15067
HPDE	23.1249	0.306348	5.5	4	619.811	0.447
HPDE	26.8213	0.382211	18.5	28.5	3272.07	0.133165
HPDE	26.2454	0.390193	19	22.5	1737.98	0.300958
HPDE	21.0496	0.264058	5.5	5	284.654	0.617667
HPDE	20.8979	0.387194	30	23.5	2273.98	0.215445
HPDE	21.4392	0.477088	10.5	8	155.109	0.683585
HPDE	21.0496	0.302828	7	5	393.805	0.502616
HPDE	20.4669	0.430904	5.5	3.5	182.205	0.566395
HPDE	22.2265	0.402885	21	17	996.9	0.365099
HPDE	22.7362	0.434665	111.5	102	3317.55	0.153695
HPDE	21.0799	0.299404	3.5	3	25.1911	0.942003
HPDE	23.3986	0.302152	3	3	109.328	0.699128
HPDE	17.224	0.418544	5	3	426.069	0.443845
HPDE	25.3069	0.314011	10	10.5	2263.5	0.227747
HPDE	20.8369	0.221883	15	9	621.302	0.586697
HPDE	20.7757	0.388146	5	3.5	29.4464	0.910998
HPDE	23.2347	0.309571	22	15.5	1265.89	0.397414
HPDE	23.6691	0.347513	17	19.5	1958.87	0.299322
HPDE	20.9283	0.236841	5	3.5	374.696	0.553308
HPDE	22.8201	0.464961	34.5	38	3198.36	0.126845
HPDE	23.8566	0.41132	51	47.5	2371.89	0.204615
HPDE	17.8055	0.496514	3	2.5	38.0979	0.792166
HPDE	20.3734	0.346465	9.5	6.5	72.1638	0.894486
HPDE	27.2452	0.444818	9	11.5	954.787	0.306516
HPDE	27.9374	0.442127	166	155.5	3586.27	0.178193
HPDE	20.745	0.268627	12	8	425.223	0.558281
HPDE	29.0763	0.643264	14.5	18	737.869	0.364341
HPDE	19.803	0.393637	12.5	11.5	96.3762	0.892064
HPDE	24.5666	0.394677	67.5	60.5	2755.23	0.199502
HPDE	22.2265	0.550484	23.5	20.5	1310.94	0.291025
HPDE	22.4545	0.407374	12.5	10.5	1118.36	0.326208
HPDE	22.4828	0.446417	586	565.5	5389.47	0.188627
HPDE	25.3069	0.449176	33	37	1594.91	0.319869
HPDE	23.3441	0.393332	9.5	8	1126.83	0.295903
HPDE	20.8063	0.374186	56	52.5	2404.47	0.275017
HPDE	16.1165	0.476445	4	4	18.7442	0.971158
HPDE	20.5291	0.407749	22.5	20.5	750.152	0.482916
HPDE	22.7642	0.364793	28.5	24.5	2643.57	0.186435
HPDE	24.1747	0.605331	69	62	2308.63	0.173444
HPDE	23.3168	0.420759	49	39.5	2708.91	0.16222
HPDE	33.6439	0.522669	350	319	3698.3	0.113502
HPDE	19.0492	0.218432	12	17.5	3188.87	0.0917387
HPDE	26.6546	0.391165	6.5	7.5	1050.33	0.3396
HPDE	20.8674	0.213042	5	2	4045.5	0.159802
HPDE	16.6985	0.545125	8	6.5	435.81	0.437391
HPDE	21.7634	0.475552	33	26.5	682.544	0.500143
HPDE	15.757	0.429857	57.5	46.5	1901.19	0.280695
HPDE	19.7063	0.166745	6	3.5	1546.73	0.348947
HPDE	20.1851	0.52053	4	2	15.8141	0.895342
HPDE	20.7757	0.218449	6.5	4.5	569.371	0.526846
HPDE	23.8833	0.440821	6.5	6	374.198	0.50405
HPDE	22.1404	0.646243	12	10	91.8332	0.778413
HPDE	23.8566	0.316172	32	11.5	5280.16	0.0679278
HPDE	25.6318	0.444017	76.5	64	3212.12	0.122376
HPDE	20.6835	0.363734	28	26.5	1751.88	0.24582
HPDE	25.9527	0.352728	123	133	3305.85	0.248031
HPDE	25.9527	0.274733	18.5	11.5	2563.52	0.256402
HPDE	22.3692	0.369973	28.5	25	2819.64	0.158127
HPDE	24.4627	0.314334	32.5	30	1509.68	0.368039
HPDE	21.7926	0.339305	24	19.5	1742.18	0.302331
HPDE	22.7642	0.276562	14.5	12.5	2056.32	0.320209
HPDE	21.9672	0.421076	72.5	59.5	4176.89	0.0799217
HPDE	23.9099	0.321519	400.5	378	5873.48	0.0113491
HPDE	25.3069	0.403653	333	322.5	4526.38	0.158285
HPDE	19.4461	0.334129	7.5	5.5	329.105	0.516583
HPDE	26.7975	0.486767	77	53.5	2754.59	0.131714
HPDE	22.6239	0.500341	4.5	3.5	190.671	0.547147
HPDE	18.2644	0.177347	19	15.5	1362.52	0.495591
HPDE	22.4828	0.365634	39.5	38.5	2971.96	0.218951
HPDE	21.1402	0.282777	30.5	24	2890.77	0.283559
HPDE	20.8674	0.244654	17.5	12.5	2794.66	0.243874
HPDE	23.0145	0.301517	3	2	184.428	0.586925
HPDE	25.9036	0.481634	9.5	12	1312.01	0.250319
HPDE	20.0902	0.29608	4.5	5.5	337.395	0.583985
HPDE	22.5111	0.301632	3.5	3.5	130.527	0.697755
HPDE	22.3408	0.299715	33	32	3401.26	0.211137
HPDE	26.6785	0.421188	4	7.5	879.865	0.335607
HPDE	24.9012	0.33702	222	183.5	5468.83	0.112888
HPDE	28.7238	0.32911	12.5	13.5	4473.72	0.101762
HPDE	21.0496	0.226887	11.5	9.5	731.418	0.540468
HPDE	26.3906	0.386893	8.5	17	2741.81	0.17096
HPDE	17.2609	0.620959	8	6.5	567.337	0.389923
HPDE	20.4358	0.347636	10.5	7.5	511.048	0.516435
HPDE	24.9267	0.448376	85	76.5	4097.53	0.0984873
HPDE	20.2795	0.284921	12	10	1001.84	0.416698
HPDE	22.7921	0.277706	17	14	2142.56	0.304177
HPDE	23.696	0.377711	17.5	15	2037.14	0.215243
HPDE	28.5683	0.452569	183	150.5	4595	0.0664928
HPDE	22.1691	0.417949	15.5	12	1575.64	0.254885
HPDE	27.7774	0.368773	38.5	49.5	4027.69	0.128569
HPDE	20.9891	0.22386	9.5	6.5	983.15	0.460355
HPDE	21.0194	0.221578	9	6	2360.82	0.27983
HPDE	24.306	0.319803	146	141.5	5686.17	0.0665462
HPDE	22.4545	0.282676	33.5	28	3531.14	0.232972
HPDE	24.8756	0.337996	103	101	5008.17	0.150151
HPDE	23.2347	0.471015	9.5	7	256.518	0.613029
HPDE	21.3499	0.256843	8.5	6	1263.28	0.359404
HPDE	20.9891	0.231754	10.5	6.5	1776.42	0.338942
HPDE	21.1402	0.324422	26.5	22	1540.48	0.41242
HPDE	21.4689	0.33143	30.5	28.5	1155.95	0.47629
HPDE	22.5111	0.456551	114	106	3977.88	0.181113
HPDE	20.1535	0.277396	22.5	16.5	1635.43	0.413588
HPDE	20.8063	0.384941	130	126.5	3461.49	0.237656
HPDE	21.9962	0.490121	28.5	18	1385.47	0.28611
HPDE	26.8924	0.462111	12.5	17	3067.82	0.104853
HPDE	15.7165	0.532804	22.5	16	900.148	0.424758
HPDE	20.8979	0.26665	6.5	4.5	265.2	0.637597
HPDE	19.3805	0.6569	5.5	8	252.119	0.52025
HPDE	25.5074	0.400782	79	27.5	2589.55	0.144395
HPDE	21.3499	0.390907	9	4	2080.76	0.215392
HPDE	17.8055	0.386452	9.5	6	873.115	0.330068
HPDE	27.6395	0.59504	27.5	29.5	2118.18	0.191608
HPDE	21.6461	0.287694	5	3	334.549	0.531589
HPDE	26.0507	0.404359	75	80.5	4141.51	0.112309
HPDE	23.2347	0.390999	5.5	4	519.381	0.42721
HPDE	24.773	0.317071	55	54.5	4299.81	0.176816
HPDE	25.0795	0.268974	21.5	19.5	2882.42	0.221397
HPDE	21.3499	0.357026	8.5	6	1505.18	0.305992
HPDE	22.8479	0.241754	7.5	4	752.243	0.448132
HPDE	21.4985	0.392991	22.5	12	430.173	0.601975
HPDE	23.696	0.274494	171	156	6819.41	0.0726135
HPDE	18.746	0.125059	7.5	3	7921.58	0.100949
HPDE	23.696	0.309106	29.5	24.5	2703.16	0.226734
HPDE	26.9633	0.338989	1374.5	1322	7036.06	0.0128025
HPDE	19.1492	0.377176	6.5	6	897.839	0.345647
HPDE	23.0145	0.404243	23	17	1684.82	0.283405
HPDE	24.306	0.28541	12	10.5	1928.82	0.301914
HPDE	25.8051	0.404869	64.5	63	3534.53	0.136896
HPDE	22.7082	0.245414	10	7.5	1785.58	0.318288
HPDE	21.6755	0.235552	6.5	4.5	1758	0.291855
HPDE	21.7634	0.176221	11.5	8.5	1835.96	0.369879
HPDE	22.5111	0.264335	12.5	8	1542.78	0.353482
HPDE	20.4669	0.146042	8.5	5.5	1245.01	0.442692
HPDE	22.1404	0.202953	8	6	1231.36	0.408562
HPDE	21.7926	0.386431	7	4	163.655	0.639689
HPDE	22.9591	0.312208	30	25.5	3306.29	0.16955
HPDE	20.9283	0.281045	86	79	4127.34	0.180143
HPDE	18.678	0.500623	4	8	2723.9	0.176016
HPDE	20.248	0.201991	14	9.5	2581.02	0.302236
HPDE	21.2902	0.165436	7.5	5.5	1753.61	0.322534
HPDE	21.2003	0.334434	44	41.5	1931.74	0.392809
HPDE	19.9949	0.358075	7	5.5	364.94	0.502609
HPDE	20.6527	0.285343	10	6.5	559.262	0.513907
HPDE	21.6755	0.254782	7	5	1072.22	0.384744
HPDE	20.5291	0.288789	21.5	19	1746.35	0.394409
HPDE	22.2551	0.396291	19	14.5	1612.33	0.2807
HPDE	21.3201	0.137696	6.5	4	6717.13	0.120474
HPDE	18.4033	0.194208	5	4	946.021	0.427512
HPDE	26.5589	0.409392	12.5	15.5	2603.61	0.137726
HPDE	20.2795	0.244577	8.5	4.5	3697.78	0.165508
HPDE	20.7757	0.264439	4.5	3	263.837	0.54077
HPDE	20.7143	0.549472	7.5	5.5	186.137	0.604495
HPDE	21.6461	0.258302	13.5	9.5	1790.05	0.309146
HPDE	23.8566	0.457217	66	60	2637.86	0.212912
HPDE	22.2265	0.375538	33	21.5	2400.12	0.205635
HPDE	20.0902	0.478371	8.5	5.5	219.875	0.577398
HPDE	19.0158	0.457215	8.5	5.5	1380.05	0.255902
HPDE	21.9672	0.229667	5.5	4	1314.81	0.336271
HPDE	20.8979	0.235019	12.5	9.5	1552.02	0.397164
HPDE	21.2603	0.221883	13	10.5	2438.1	0.286415
HPDE	20.9283	0.170068	59	48	7943.05	0.103812
HPDE	21.6166	0.384078	17.5	16	679.462	0.455393
HPDE	24.3845	0.40731	22.5	19	2307.57	0.228417
HPDE	20.6527	0.218449	21	15.5	2875.39	0.275
HPDE	21.4985	0.241929	10	6.5	1830.14	0.298718
HPDE	17.5897	0.282809	11.5	3.5	118.215	0.789591
HPDE	22.3692	0.307341	48	40.5	2083	0.37724
HPDE	21.2303	0.441035	270	84	4028.14	0.256346
HPDE	19.8992	0.229989	8.5	5	144.364	0.779662
HPDE	22.3977	0.558997	7.5	6	710.158	0.309866
HPDE	21.5577	0.52664	23.5	18.5	922.171	0.413744
HPDE	21.0194	0.463404	14	10.5	727.558	0.439066
HPDE	19.8992	0.212559	10	7	762.689	0.504205
HPDE	21.4392	0.456795	22.5	17	1689.71	0.309018
HPDE	22.4545	0.454693	9	6	466.241	0.454775
HPDE	25.8298	0.383539	47.5	56	4177.2	0.120902
HPDE	22.054	0.408767	6	6	2415.86	0.147682
HPDE	24.8243	0.44223	119	111.5	3558.23	0.169622
HPDE	20.1535	0.178758	35.5	24.5	4462.33	0.21725
HPDE	18.334	0.476972	19.5	17.5	1362.8	0.285548
HPDE	20.6527	0.604001	21	20	1337.63	0.294121
HPDE	21.4392	0.266585	13	9.5	1344.22	0.370203
HPDE	21.1703	0.356016	9	6.5	512.106	0.482722
HPDE	20.1219	0.407898	61.5	59	2942.85	0.160076
HPDE	26.916	0.431424	15.5	22	2030.95	0.210394
HPDE	16.4294	0.196623	1.5	2	4354.59	0.111591
HPDE	23.1799	0.268894	15	14.5	4040.33	0.181364
HPDE	22.7362	0.23966	13	11.5	4452.31	0.177786
HPDE	22.7082	0.297728	22	21	3640.73	0.119562
HPDE	23.4258	0.293982	22	21	3790.83	0.203409
HPDE	25.2061	0.345884	153.5	161	4929.76	0.190653
HPDE	21.6166	0.370614	18	15.5	2635.75	0.161079
HPDE	23.4258	0.196864	11.5	9	3993.15	0.2123
HPDE	19.7063	0.695226	26.5	21	365.633	0.598683
HPDE	25.607	0.460978	7.5	7.5	541.336	0.427283
HPDE	19.674	0.158688	5	6	1830.23	0.377809
HPDE	25.3823	0.477486	20	19	1536.27	0.254042
HPDE	20.8979	0.415381	8.5	6	270.954	0.571138
HPDE	21.2303	0.413153	3	2	37.9824	0.780563
HPDE	21.0194	0.157996	8	6	867.581	0.496865
HPDE	21.9382	0.214339	7.5	6	2512.09	0.272569
HPDE	26.1969	0.36311	6.5	8.5	1487.1	0.273163
HPDE	15.1808	0.238755	42.5	38	4595.65	0.196936
HPDE	22.5958	0.210892	15	14	3092.4	0.244246
HPDE	20.1851	0.142526	8.5	6.5	2822.35	0.297415
HPDE	14.2283	0.342002	13	12	2091.35	0.215377
HPDE	18.6439	0.429789	6.5	5.5	118.773	0.695446
HPDE	26.8924	0.292547	9.5	4.5	6493.75	0.0421377
HPDE	19.7063	0.107925	9	6	2104.48	0.366878
HPDE	19.3805	0.383488	6	2.5	149.463	0.595818
HPDE	26.845	0.377353	71.5	81.5	4970.16	0.076652
HPDE	20.498	0.46919	119	108	2280.52	0.300966
HPDE	20.7143	0.251817	5.5	4.5	870.674	0.411622
HPDE	19.2487	0.148723	8.5	6.5	5834.62	0.171147
HPDE	17.948	0.607066	11.5	11.5	717.859	0.369746
HPDE	25.4574	0.399035	231	235.5	4954.03	0.118196
HPDE	19.7708	0.266716	22.5	21	2190.39	0.168404
HPDE	23.0973	0.356847	28	20	2811.99	0.189894
HPDE	20.9283	0.202978	13.5	11	3012.8	0.247409
HPDE	24.6183	0.330222	63.5	62	4034.62	0.187953
HPDE	10.9981	0.281731	6.5	6.5	1279.75	0.320002
HPDE	29.0982	0.556682	10	9.5	553.872	0.421613
HPDE	17.8412	0.359675	44	42	3367.61	0.156586
HPDE	13.4462	0.304654	48.5	50.5	6081.37	0.071651
HPDE	14.4062	0.270037	22	21.5	2064.72	0.361982
HPDE	14.2283	0.191134	14	10.5	1696.23	0.382039
HPDE	17.4808	0.420388	7.5	7	335.7	0.517794
HPDE	21.8218	0.282696	18	18.5	4316.88	0.0844264
HPDE	11.3961	0.287236	8	8.5	1809.38	0.301462
HPDE	23.9631	0.395383	20	28	3236.75	0.141622
HPDE	27.034	0.244473	8	5	1246.29	0.288996
HPDE	20.56	0.193262	19.5	15	3622.55	0.268682
HPDE	15.2644	0.262193	5.5	4	486.105	0.493503
HPDE	22.4545	0.282258	29	32.5	4949.65	0.113416
HPDE	32.6646	0.331822	15.5	17.5	4314.09	0.0847953
HPDE	11.9416	0.221578	10	9	2304.1	0.297555
HPDE	18.678	0.429996	49.5	48.5	3040.63	0.12875
HPDE	13.2555	0.261761	7.5	6	938.565	0.457992
HPDE	16.4682	0.46888	41.5	37.5	1480.29	0.337242
HPDE	19.4461	0.333158	27.5	29	2180.88	0.287589
HPDE	14.4062	0.237643	13	11.5	1526.61	0.39568
HPDE	23.5612	0.325391	64	63.5	3773.21	0.214061
HPDE	22.4545	0.244198	74.5	72.5	5518.98	0.156133
HPDE	21.0194	0.221074	10.5	8	1538.46	0.381214
HPDE	23.8032	0.358108	25.5	22.5	1652.36	0.319298
HPDE	22.5394	0.361974	22	18	4317.78	0.156954
HPDE	25.8051	0.339697	7.5	8.5	3805.31	0.102773
HPDE	21.851	0.37833	23	20	2006.25	0.299284
HPDE	22.2265	0.249003	28.5	25	4291.82	0.170474
HPDE	20.9283	0.341772	55.5	48	5062.96	0.107232
HPDE	25.1049	0.436899	10.5	7	5780.02	0.0207896
HPDE	23.9099	0.293302	26.5	26	4037.15	0.151653
HPDE	16.0373	0.376581	38.5	5.5	96.095	0.79974
HPDE	24.9522	0.350377	33	37	3428.49	0.154343
HPDE	19.4134	0.213379	12.5	6	2865.87	0.183364
HPDE	22.7921	0.279107	24.5	23	2798.96	0.244956
HPDE	19.4788	0.262405	5	3.5	566.507	0.463293
HPDE	19.7386	0.307202	82.5	79.5	4645.77	0.112835
HPDE	21.2902	0.393909	14	11	1293.33	0.311763
HPDE	26.4388	0.418421	30	33	3204.13	0.0912716
HPDE	24.773	0.252192	28.5	19	5562.11	0.106971
HPDE	23.2073	0.440828	45.5	44	3803.11	0.09544
HPDE	23.1799	0.245414	21.5	19.5	3790.78	0.199887
HPDE	20.4046	0.355881	3	3.5	864.121	0.356132
HPDE	19.116	0.469337	137	136	3629.94	0.083615
HPDE	21.3201	0.304586	7.5	5	1045.46	0.393582
HPDE	23.4529	0.320831	7	5.5	1068.2	0.32753
HPDE	20.6219	0.535839	4	4.5	112.166	0.650409
HPDE	22.4545	0.431323	4.5	4	434.46	0.442014
HPDE	22.7642	0.269784	19	18	3973.17	0.181747
HPDE	21.7634	0.33164	8	4.5	1149.43	0.337181
HPDE	21.0496	0.193026	7.5	6	1373.15	0.379418
HPDE	21.3797	0.40953	2.5	2.5	86.4189	0.666571
HPDE	24.1484	0.32365	91	93.5	4410.54	0.164867
HPDE	27.5703	0.523107	27	39	2082.26	0.204619
HPDE	23.0422	0.350804	6	5	918.493	0.355863
HPDE	21.9382	0.25584	18	15.5	2502.3	0.293069
HPDE	20.7757	0.215923	6	4.5	684.726	0.477024
HPDE	23.5883	0.460445	42.5	38.5	2338.42	0.193648
HPDE	27.5241	0.532739	9.5	10	953.777	0.303369
HPDE	21.3797	0.46253	3.5	3	98.0833	0.652858
HPDE	16.5068	0.419685	4	2.5	51.8874	0.801934
HPDE	19.4134	0.576192	5.5	4.5	105.489	0.658148
HPDE	24.2536	0.476138	7.5	6.5	292.808	0.537785
HPDE	11.3961	0.424313	8	25	3166.19	0.104666
HPDE	26.0507	0.572473	55	59	2134.88	0.154418
HPDE	18.6439	0.542739	27	31.5	2203.93	0.190672
HPDE	23.5612	0.301134	41	40.5	4947.12	0.124122
HPDE	13.0131	0.58302	24	27	2200.02	0.161881
HPDE	26.9869	0.271589	12	18	4266.46	0.0527848
HPDE	23.1249	0.280742	26.5	24	3644.59	0.212259
HPDE	23.5883	0.312304	27	26.5	3335.02	0.217942
HPDE	25.4324	0.323379	105	110	4662.6	0.156954
HPDE	19.3805	0.339293	30.5	44.5	4605.68	0.0854672
HPDE	22.3408	0.256431	9	8	1836.41	0.318226
HPDE	20.4046	0.190401	16	12.5	1988.74	0.385188
HPDE	20.745	0.274122	12.5	9.5	2274.87	0.308569
HPDE	21.6166	0.255646	16	14	2810.78	0.278206
HPDE	23.1249	0.287236	7.5	6.5	532.48	0.505828
HPDE	22.4261	0.271258	159	151.5	4173.34	0.134398
HPDE	25.5074	0.359271	43	48.5	3923.97	0.15438
HPDE	24.1747	0.235254	4	2.5	567.738	0.448592
HPDE	25.332	0.356976	28	30.5	3812.49	0.160778
HPDE	27.5934	0.44027	78.5	82	3722.15	0.091419
HPDE	21.8218	0.182059	8.5	7	3611.74	0.231822
HPDE	19.6416	0.393199	5	2	53.8796	0.750536
HPDE	26.7262	0.433241	17	23	2860.17	0.16417
HPDE	21.5281	0.198748	7	4.5	608.435	0.522026
HPDE	25.2565	0.468927	5	5.5	501.616	0.410811
HPDE	24.2273	0.433402	12	10.5	1329.03	0.298083
HPDE	21.1402	0.287823	4.5	3	138.125	0.657
HPDE	24.5147	0.318062	46.5	50.5	4058.51	0.184623
HPDE	20.9587	0.333676	11	9.5	1298.4	0.317781
HPDE	25.4324	0.441341	4	3.5	232.505	0.533441
HPDE	23.6691	0.30834	15.5	13.5	2004.95	0.308676
HPDE	20.9283	0.355445	7.5	3.5	76.7638	0.747653
HPDE	22.3123	0.275702	9.5	7.5	1619.67	0.282461
HPDE	21.8801	0.301932	15	11	1501.96	0.396613
HPDE	21.4985	0.218894	11	8	890.535	0.489446
HPDE	22.0828	0.22089	6	4	5697.53	0.112093
HPDE	21.5281	0.248812	5	3	2205.27	0.20592
HPDE	21.5281	0.171639	4.5	3	3421.25	0.194229
HPDE	24.0427	0.330027	28.5	29	2354.13	0.292651
HPDE	20.2166	0.269295	5	2.5	258.918	0.608088
HPDE	21.7926	0.242392	6.5	5	1501.1	0.350622
HPDE	25.2565	0.327032	19	19.5	2813.42	0.235108
HPDE	19.7708	0.388605	4	3.5	48.8933	0.839778
HPDE	19.7708	0.337266	7	4	2606.13	0.172892
HPDE	22.2265	0.25533	24.5	26	4075.44	0.198205
HPDE	23.0698	0.276562	18.5	17	2124.06	0.284759
HPDE	20.56	0.190365	8.5	7	1694.39	0.363946
HPDE	19.6091	0.309352	5.5	3.5	184.108	0.654613
HPDE	21.7048	0.252177	4.5	2.5	1926.37	0.255269
HPDE	20.9891	0.199003	6.5	4.5	1838.91	0.311618
HPDE	21.5281	0.229389	15	13.5	3119.61	0.251836
HPDE	20.745	0.431275	3	2.5	153.303	0.585345
HPDE	20.9891	0.29519	10	8	793.64	0.462993
HPDE	20.2166	0.213126	24	20	3525.89	0.273751
HPDE	18.9823	0.189412	32.5	25.5	3658.44	0.325095
HPDE	21.4985	0.338613	12	10.5	869.289	0.412779
HPDE	20.6219	0.257588	25.5	20.5	3346.82	0.249128
HPDE	20.7143	0.430728	46	60	3464.79	0.132609
HPDE	19.4461	0.382949	44.5	42.5	2395.27	0.220262
HPDE	21.6755	0.268887	48	45	4185.73	0.199642
HPDE	30.4662	0.392525	15	21	1410.43	0.332126
HPDE	19.2156	0.459164	4.5	5	819.467	0.322022
HPDE	20.591	0.228778	6.5	4.5	486.047	0.532046
HPDE	21.8801	0.289936	69	65	5031.14	0.161723
HPDE	28.367	0.387282	2309	2313	5852.31	0.101679
HPDE	24.85	0.467093	59.5	62.5	2579.01	0.218301
HPDE	16.4294	0.492503	17.5	16	1065.88	0.368126
HPDE	19.116	0.202225	14.5	9.5	2393.47	0.332956
HPDE	25.2565	0.430622	9.5	9	977.959	0.334993
HPDE	21.0194	0.46594	8.5	6	239.141	0.571134
HPDE	22.8479	0.345543	84.5	80	3857.45	0.136098
HPDE	22.7362	0.293917	53	43.5	3619.61	0.226931
HPDE	23.9897	0.326029	480.5	480.5	6357.46	0.160895
HPDE	23.6422	0.46648	23	17.5	1055.44	0.34638
HPDE	24.122	0.343468	719.5	693	6683.41	0.106823
HPDE	27.0105	0.437552	1391.5	1214	5161.26	0.0982344
HPDE	19.9311	0.265398	16.5	9	1474.61	0.384782
HPDE	21.6166	0.270111	115	89.5	4800.22	0.241598
HPDE	23.48	0.321139	80	40	4502.05	0.109633
HPDE	23.7228	0.399428	38.5	20.5	1171.59	0.33219
HPDE	24.122	0.626164	49.5	55	1579.76	0.340259
HPDE	23.1524	0.345475	16.5	9	1156.77	0.355981
HPDE	19.7063	0.498832	9.5	6	1522.71	0.261535
HPDE	19.1492	0.422349	344	266.5	5540.54	0.0651294
HPDE	21.2603	0.383678	277.5	234.5	4594.8	0.0294822
HPDE	19.0158	0.423983	15	10	656.345	0.492412
HPDE	20.0585	0.196144	20	13.5	3530.53	0.242497
HPDE	22.0828	0.283826	44	33.5	2919.18	0.284088
HPDE	17.0382	0.392574	15.5	19.5	3318.5	0.126796
HPDE	18.7121	0.344114	8	5.5	431.69	0.500893
HPDE	20.4046	0.266944	16	12	409.843	0.694353
HPDE	24.67	0.345286	424.5	147.5	4143.07	0.163516
HPDE	19.8992	0.232863	30	22.5	4020.17	0.247227
HPDE	29.5109	0.476359	256	231	3824.41	0.139907
HPDE	24.0427	0.359281	3.5	3.5	320.726	0.511346
HPDE	25.3069	0.34916	22.5	22	2425.16	0.254135
HPDE	24.773	0.355695	6	6	300.958	0.57066
HPDE	21.7341	0.331974	37.5	24	4244.46	0.10895
HPDE	24.7987	0.423056	10.5	12	1256.89	0.30383
HPDE	15.9177	0.443675	8	7	609.693	0.412166
HPDE	19.5115	0.308781	14	3	5631.05	0.0279018
HPDE	22.8758	0.299032	7	6	252.231	0.633184
HPDE	17.5535	0.178306	162.5	57.5	4223.2	0.0079534
HPDE	20.498	0.179404	4	2	2802.62	0.207667
HPDE	26.5109	0.481596	1906	1707	5006.54	0.0445692
HPDE	22.7362	0.485269	73	3	261.72	0.49144
HPDE	21.4392	0.222773	5	2	886.147	0.367559
HPDE	23.3986	0.382806	5	3	332.482	0.473144
HPDE	25.4324	0.417309	5.5	5.5	604.493	0.403065
HPDE	24.2273	0.513054	6	4.5	73.7284	0.738348
HPDE	21.0496	0.207204	2.5	2	211.465	0.616604
HPDE	20.2166	0.520309	2.5	2	32.0018	0.793754
HPDE	23.3168	0.286455	27	25.5	4758.98	0.14604
HPDE	21.9382	0.267298	16.5	12	1988.28	0.302857
HPDE	21.2902	0.231891	3	2	6899.66	0.0547647
HPDE	18.2992	0.313096	27.5	5.5	592.449	0.4841
HPDE	15.0967	0.357532	12.5	15	1868.74	0.263979
HPDE	24.4627	0.301294	47.5	39	4869.21	0.116802
HPDE	21.2902	0.260529	2.5	2	110.493	0.677719
HPDE	23.6691	0.300921	9.5	6.5	1630.68	0.284063
HPDE	14.4062	0.311329	4	3	1919.66	0.20131
HPDE	24.6442	0.643028	36.5	48.5	2465.71	0.166935
HPDE	25.0795	0.360151	35	34.5	3508.25	0.168551
HPDE	25.7557	0.365263	49	47	3965.41	0.147749
HPDE	29.1637	0.42249	55	49.5	3959.55	0.0812796
HPDE	24.8243	0.30834	2	2	344.836	0.477781
HPDE	19.7386	0.449867	180	55	3222.32	0.125337
HPDE	26.1726	0.395377	8	6	1247.38	0.279035
HPDE	27.0105	0.420179	8.5	19	5901.34	0.0274343
HPDE	19.5115	0.175621	4.5	2.5	982.822	0.415312
HPDE	13.5406	0.390061	6	4	29.4457	0.943713
HPDE	21.4985	0.232792	6.5	3	985.355	0.372196
HPDE	19.2487	0.367781	131	14	1334.67	0.320514
HPDE	20.8369	0.240025	98.5	2	34.965	0.890907
HPDE	18.3687	0.421892	46	13.5	2042.87	0.209679
HPDE	22.3977	0.242961	36.5	23.5	3727.15	0.217642
HPDE	17.187	0.511107	367.5	130	3822.24	0.105251
HPDE	24.0427	0.293797	12	8.5	1162.59	0.355388
HPDE	23.8833	0.325265	6	3.5	1457.89	0.257134
HPDE	24.4887	0.375264	4	2.5	515.721	0.409817
HPDE	21.4985	0.27659	5	3.5	293.903	0.565254
HPDE	24.2273	0.32291	10.5	5.5	1380.05	0.298312
HPDE	24.0427	0.317029	29	20.5	2844.74	0.210612
HPDE	28.7681	0.446236	96.5	2.5	29.5297	0.849924
HPDE	30.5914	0.532393	6	2.5	35.5657	0.776561
HPDE	29.918	0.535497	11.5	6.5	734.099	0.337698
HPDE	21.3499	0.325772	5	3	20.7505	0.978652
HPDE	25.6318	0.363117	7	6	652.022	0.404973
HPDE	23.9631	0.429665	2	2	33.8643	0.795375
HPDE	22.1404	0.211054	2	2	261.199	0.575155
HPDE	14.6255	0.549687	7.5	16	637.464	0.460409
HPDE	17.2977	0.261973	7	5	827.409	0.453362
HPDE	21.5577	0.191297	2.5	2	337.985	0.546179
HPDE	19.5115	0.419785	6	7	1163.94	0.2836
HPDE	23.2073	0.366632	3.5	3	28.336	0.90924
HPDE	23.2621	0.30834	17.5	15	1689.65	0.323063
HPDE	24.3322	0.34215	14	12	808.375	0.43713
HPDE	22.9591	0.352777	5.5	4.5	903.185	0.340565
HPDE	21.9672	0.234297	6	3.5	377.553	0.56075
HPDE	27.034	0.404063	5.5	3.5	1898.6	0.187775
HPDE	21.3797	0.218528	17	11	1037.47	0.471215
HPDE	17.7697	0.297728	70	55.5	3262.2	0.251105
HPDE	14.3175	0.270111	35	26.5	2449.68	0.32312
HPDE	21.8801	0.255728	33.5	22.5	3881.82	0.2236
HPDE	24.5666	0.423431	3.5	3	265.392	0.503671
HPDE	24.5406	0.656798	11.5	14.5	1196.95	0.286574
HPDE	23.2073	0.373402	11	8.5	432.625	0.549819
HPDE	19.674	0.261964	7.5	5	148.781	0.778514
HPDE	27.175	0.427548	28	35	3479.18	0.133259
HPDE	19.9949	0.216312	4.5	2.5	32.3024	0.950371
HPDE	19.0492	0.202293	4	2.5	545.676	0.546083
HPDE	25.1808	0.358265	272	270	5718.26	0.127221
HPDE	24.4106	0.346379	10.5	8	963.31	0.366796
HPDE	35.3959	0.604013	226.5	202	3156.54	0.0869391
HPDE	20.2795	0.218748	2.5	2	68.3398	0.800817
HPDE	21.2902	0.458968	4	9	6064.98	0.0807615
HPDE	24.7473	0.342466	8.5	7.5	835.737	0.415746
HPDE	23.0698	0.607128	30	19.5	2138.61	0.18586
HPDE	22.0828	0.250775	17.5	8.5	1359.33	0.374936
HPDE	25.2565	0.57323	274.5	275.5	3968.98	0.23638
HPDE	22.1978	0.289219	47	39.5	6067.96	0.0180599
HPDE	18.4379	0.2724	26	16	3116.18	0.198321
HPDE	24.0956	0.334723	87.5	47.5	3507.45	0.213497
HPDE	20.7143	0.201724	6.5	4	224.308	0.69115
HPDE	25.7557	0.185309	12	4.5	8696.14	0.0484299
HPDE	25.4574	0.351786	16	11	2869.79	0.17693
HPDE	23.3713	0.384617	33.5	19.5	1995.6	0.293446
HPDE	24.4106	0.401098	19	20.5	1153.64	0.386296
HPDE	14.8415	0.417329	123.5	12.5	1794.44	0.208671
HPDE	24.1747	0.202262	6.5	4	8503.33	0.0566739
HPDE	20.0585	0.193455	11.5	7	1011.47	0.489494
HPDE	23.2073	0.319232	98	96	3093.21	0.281081
HPDE	24.6183	0.328621	6.5	4.5	301.103	0.55135
HPDE	29.1201	0.435075	43	46	2904.11	0.121002
HPDE	23.0973	0.276783	17	10	1991.87	0.286019
HPDE	25.0541	0.390274	83	71	3095.64	0.236153
HPDE	21.6755	0.224744	14.5	8.5	1797.09	0.336273
HPDE	15.4716	0.369078	12	13.5	2151.93	0.225216
HPDE	19.2487	0.343424	3.5	3	253.781	0.554958
HPDE	23.5612	0.290221	4	3	187.195	0.621143
HPDE	23.1249	0.28788	5.5	4	461.443	0.494473
HPDE	17.3345	0.315992	4.5	3.5	901.277	0.363536
HPDE	17.9125	0.399226	28	6.5	312.534	0.559817
HPDE	23.3986	0.486737	13.5	19	1412.17	0.336465
HPDE	24.85	0.321534	11	7	798.895	0.39943
HPDE	22.7082	0.261818	13	9.5	1757.4	0.311899
HPDE	21.2603	0.223738	9.5	5	181.887	0.746727
HPDE	22.4545	0.26797	17	11	1639.18	0.343534
HPDE	20.2166	0.186297	25	17	2940.13	0.296239
HPDE	23.1799	0.258215	15.5	13	1953.53	0.305546
HPDE	16.0769	0.310532	4.5	3.5	237.728	0.587229
HPDE	22.8201	0.373752	7	6.5	422.239	0.508324
HPDE	21.3797	0.221883	13.5	9.5	319.796	0.704005
HPDE	19.8992	0.125743	10.5	6.5	3122.89	0.290407
HPDE	25.9772	0.380735	17.5	19.5	3137.41	0.17274
HPDE	19.6416	0.251718	7	4	161.527	0.713832
HPDE	23.4258	0.305859	6.5	5.5	602.411	0.478784
HPDE	24.9012	0.292631	33.5	31	3572.12	0.211158
HPDE	20.3421	0.208653	13	8.5	533.325	0.620838
HPDE	22.3977	0.709762	30	26.5	2541.2	0.089379
HPDE	31.655	0.231912	9.5	7	6011.83	0.0729149
HPDE	22.4545	0.415136	9	14	1606.66	0.252183
HPDE	13.3034	0.229133	6	4.5	2825.66	0.245167
HPDE	22.1116	0.255728	5	3	368.6	0.524457
HPDE	20.8063	0.239881	16.5	16.5	3628	0.192872
HPDE	27.6165	0.0920325	10.5	10	5342.49	0.0226829
HPDE	17.9834	0.34999	20	17.5	1280.68	0.392479
HPDE	22.2265	0.294775	4	3	310.869	0.525309
HPDE	22.1404	0.266937	6.5	5.5	137.154	0.757123
HPDE	17.8055	0.162398	4	4	14361.6	0.00290601
HPDE	23.696	0.354741	46	37	3016.14	0.207357
HPDE	22.0828	0.441718	5	4	154.183	0.62358
HPDE	30.9019	0.433891	3915.5	2256	5127.55	0.0405069
HPDE	19.0826	0.370012	5	5	151	0.668528
HPDE	23.0145	0.285358	87	80.5	3512.58	0.338627
HPDE	14.9271	0.356635	106	85	3797.38	0.216238
HPDE	20.591	0.464445	128	97.5	3855.79	0.120359
HPDE	15.7973	0.344215	15.5	16	2833.53	0.146899
HPDE	23.2347	0.319628	77.5	69	2429.84	0.284959
HPDE	22.0251	0.251245	9	7	446.828	0.584427
HPDE	22.5958	0.300603	5	4	301.844	0.56032
HPDE	9.37302	0.208108	9	8	1902.79	0.332294
HPDE	22.3123	0.302038	20	16	2124.22	0.314271
HPDE	20.6219	0.220892	8.5	7	839.08	0.460213
HPDE	21.7926	0.27612	11.5	8.5	2103.61	0.285814
HPDE	22.4545	0.356991	9.5	7.5	1406.13	0.29979
HPDE	10.28	0.354329	7	5.5	1130.53	0.313791
HPDE	24.2273	0.327293	24.5	19.5	4312.15	0.11707
HPDE	24.3322	0.343101	45.5	41.5	3749.88	0.175498
HPDE	22.054	0.226794	10.5	7.5	4771.05	0.12544
HPDE	25.1302	0.382668	97	96	4285.98	0.151254
HPDE	20.8674	0.371766	7.5	7	597.427	0.462806
HPDE	20.591	0.423046	31.5	10.5	2722.56	0.160822
HPDE	12.7662	0.35252	28.5	24	1725.73	0.346829
HPDE	22.9591	0.335979	154	104	4809.46	0.133344
HPDE	24.3322	0.293539	117	106.5	4345.78	0.258739
HPDE	24.0427	0.275304	34	31.5	3695.69	0.206684
HPDE	20.0585	0.421793	9.5	8	1720.02	0.208921
HPDE	21.6166	0.211946	5.5	4.5	457.741	0.547564
HPDE	20.8063	0.181333	7	4.5	9993.56	0.0109368
HPDE	18.746	0.410717	121.5	99.5	4463.56	0.0983643
HPDE	18.4033	0.191134	4	3.5	751.766	0.425246
HPDE	15.757	0.444765	13.5	15.5	3581.63	0.115185
HPDE	27.9146	0.448413	308	130	3856.23	0.0535533
HPDE	25.9282	0.0567905	4	9	5783.11	0.0101216
HPDE	19.3805	0.425325	87	92.5	4316.63	0.168931
HPDE	25.1049	0.311493	3.5	4	698.217	0.432372
HPDE	23.5883	0.246481	116	84.5	2708.94	0.361134
HPDE	20.4046	0.204113	67	49	4705.14	0.242682
HPDE	22.2265	0.211575	13	6.5	3527.89	0.211219
HPDE	18.7121	0.430097	10.5	2.5	245.823	0.499277
HPDE	19.9311	0.225572	11	6	386.18	0.64189
HPDE	19.8992	0.184899	15	6.5	117.683	0.889695
HPDE	15.1388	0.223903	8	4.5	56.2335	0.950752
HPDE	19.3805	0.158227	30.5	18.5	9542.96	0.0869023
HPDE	21.1703	0.178683	26.5	19	3577.28	0.266181
HPDE	26.8687	0.58977	9.5	7	1056.08	0.25562
HPDE	17.6979	0.248032	2.5	2.5	544.225	0.457091
HPDE	10.1554	0.162543	188.5	142.5	7435.25	0.216012
HPDE	31.9353	0.413971	553.5	392.5	4333.88	0.159933
HPDE	21.7341	0.242071	52	42	4610.16	0.213209
HPDE	20.7143	0.221578	49	35	4586.91	0.240258
HPDE	20.248	0.337039	5.5	8.5	1822.43	0.255944
HPDE	24.8243	0.0693872	8	16	2482.29	0.182428
HPDE	19.4788	0.299593	11.5	7.5	4030.29	0.172754
HPDE	23.6422	0.425976	4.5	4	2255.91	0.152245
HPDE	16.5837	0.239035	262.5	160.5	6887.42	0.189455
HPDE	10.7641	0.252431	17	11	718.524	0.570386
HPDE	24.0162	0.0326123	18.5	19	4639.45	0.0508753
HPDE	13.9573	0.485318	99	87	2275.64	0.26452
HPDE	14.4503	0.238818	40.5	30.5	2821.8	0.339012
HPDE	15.389	0.235611	106.5	98.5	5924.05	0.221495
HPDE	23.2347	0.213318	12	14	1038.58	0.328902
HPDE	17.2609	0.409364	126.5	42	4630.69	0.089413
HPDE	28.1643	0.286859	7.5	9	6328.25	0.0407267
HPDE	14.9696	0.224385	86.5	76	7271.36	0.151235
HPDE	13.2555	0.187835	86	67	6894.85	0.181522
HPDE	14.4943	0.213614	87.5	78	3455.64	0.343799
HPDE	15.3061	0.221074	17.5	14.5	3706.01	0.224967
HPDE	20.248	0.186117	15.5	11	3275.92	0.303433
HPDE	12.5651	0.167501	16.5	12	4740.56	0.229225
HPDE	13.4935	0.34516	9.5	6.5	245.884	0.600689
HPDE	15.5126	0.190401	24	16.5	2658.52	0.331467
HPDE	14.5819	0.224744	54	48	4722.11	0.22264
HPDE	14.4503	0.229389	9	6	3524.03	0.205131
HPDE	21.0799	0.218748	11	7	2587.6	0.291951
HPDE	21.6166	0.219822	106.5	93.5	3420.7	0.204253
HPDE	21.2003	0.21649	73.5	64	7385.72	0.157514
HPDE	20.591	0.218605	46.5	29.5	4465.96	0.248658
HPDE	20.6527	0.221128	13	10	3149.05	0.274218
HPDE	20.9891	0.213042	110	90	8000.3	0.154151
HPDE	37.356	0.257566	15	11	2313.93	0.300645
HPDE	21.0496	0.210164	99	72.5	5548.56	0.249694
HPDE	21.8801	0.229389	61	49.5	6224.95	0.159284
HPDE	25.5323	0.609517	4	6	105.927	0.669006
HPDE	24.306	0.459995	3.5	2	188.589	0.521183
HPDE	22.1404	0.25401	12	6.5	680.374	0.486428
HPDE	21.3499	0.214377	41.5	32	5178.79	0.208122
HPDE	20.745	0.196266	23	15	6604.96	0.144395
HPDE	19.9631	0.229556	15	10	840.668	0.559161
HPDE	20.6527	0.213612	38.5	30.5	4780.71	0.219526
HPDE	22.3408	0.0794111	8.5	9	5259.47	0.0656955
HPDE	20.8979	0.208491	47.5	40	5140.47	0.221051
HPDE	20.9587	0.317255	319	297.5	5134.49	0.330137
HPDE	19.1492	0.661342	1014.5	1010	3798.41	0.16507
HPDE	19.7063	0.196356	39	31	5364.35	0.196398
HPDE	20.0267	0.201906	69	62	6978.56	0.18073
HPDE	23.4529	0.233026	41	37.5	4064.52	0.255221
HPDE	12.9641	0.0786417	18.5	11	8764.99	0.107181
HPDE	15.8376	0.0503035	5	3.5	10102.1	0.00340228
HPDE	28.6351	0.434291	6.5	18.5	3254.3	0.104296
HPDE	21.2902	0.204957	4.5	2.5	2651.56	0.232729
HPDE	20.5291	0.196298	22.5	16	4616.48	0.222291
HPDE	21.5281	0.23172	38.5	32	3868.42	0.278753
HPDE	13.3988	0.24271	85.5	70.5	4932.7	0.210253
HPDE	21.4689	0.234307	67.5	59	7033.2	0.161316
HPDE	23.0145	0.293259	268.5	201.5	4802.61	0.344293
HPDE	20.498	0.201886	5	3.5	1269.5	0.375259
HPDE	21.0496	0.358267	187.5	174	5801.48	0.041728
HPDE	23.9099	0.280741	12.5	11	2714.52	0.233227
HPDE	22.054	0.255646	57.5	50	5441.03	0.178794
HPDE	22.1691	0.227616	139	125	6253.78	0.210505
HPDE	22.2265	0.28506	32.5	32.5	2448.35	0.322609
HPDE	21.6166	0.232458	2	2	1134.77	0.330353
HPDE	21.8218	0.25533	17	12.5	355.95	0.713508
HPDE	14.3175	0.605275	165	152.5	2970.42	0.140621
HPDE	21.8218	0.236842	54.5	43.5	5154.09	0.207498
HPDE	21.5577	0.252227	233	214.5	8201.02	0.148622
HPDE	22.0828	0.253094	456	443	7085.59	0.210943
HPDE	24.4366	0.6174	20	19.5	1536.21	0.258597
HPDE	20.745	0.103657	12	5.5	5077.08	0.169372
HPDE	21.4095	0.257155	107.5	88.5	5364.76	0.242018
HPDE	29.1419	0.42214	2.5	9.5	1334.35	0.268854
HPDE	15.4716	0.208859	79	58.5	8821.33	0.108258
HPDE	14.5819	0.201227	119	100.5	9860.44	0.0968364
HPDE	15.3476	0.310113	273	261.5	6157.05	0.275459
HPDE	22.9036	0.213042	38.5	34.5	4843.49	0.264629
HPDE	22.5111	0.592915	49.5	44	2229.68	0.225731
HPDE	17.4078	0.246262	18.5	2.5	5000.01	0.0861972
HPDE	21.4689	0.261858	25.5	18	6912.38	0.0711806
HPDE	18.2644	0.25501	21	13.5	1127.42	0.279464
HPDE	17.8055	0.0784149	18	11	15760.4	0.00328465
HPDE	19.1824	0.213954	30	22	2421.34	0.420401
HPDE	20.3421	0.187999	60	44.5	7720.81	0.116191
HPDE	25.3572	0.331829	3	3	73.9755	0.761521
HPDE	21.3797	0.262162	197.5	189	6964.89	0.16552
HPDE	20.1851	0.187749	58	47.5	5862.24	0.227039
HPDE	21.9672	0.160248	100	92	7469.38	0.174387
HPDE	20.4669	0.201906	91	80	5707.52	0.27281
HPDE	24.306	0.323766	10.5	10	3968.4	0.122227
HPDE	24.5406	0.582698	5	15.5	1257.43	0.26889
HPDE	19.9631	0.20167	18	13.5	4873.67	0.197464
HPDE	20.2166	0.223973	99	93	5993.19	0.243107
HPDE	18.3687	0.0898312	10	10	2971.53	0.206702
HPDE	15.7165	0.188281	154.5	145.5	8211.6	0.164983
HPDE	15.5126	0.195211	55.5	48.5	6983.06	0.168181
HPDE	14.1386	0.508341	28	23.5	1419.07	0.395401
HPDE	27.385	0.582074	10	15.5	743.658	0.392102
HPDE	22.7082	0.302963	3	2.5	2784.92	0.150044
HPDE	25.1302	0.342353	15.5	15	2814.11	0.162277
HPDE	22.8479	0.2993	4.5	3	313.96	0.545758
HPDE	18.0893	0.127742	11.5	12	13805.8	0.0632016
HPDE	20.591	0.169959	30.5	22.5	2793.97	0.376062
HPDE	22.5676	0.260317	2.5	3	2210.03	0.230134
HPDE	24.3584	0.692798	94	92.5	2714.86	0.0957389
HPDE	23.6422	0.252033	4	4.5	169.644	0.727687
HPDE	24.2273	0.317808	81.5	79.5	3314.79	0.317931
HPDE	23.7764	0.314011	6.5	6	3720.22	0.130715
HPDE	28.8124	0.387341	9	10.5	1922.45	0.229326
HPDE	23.2347	0.309935	105.5	102	5232.16	0.203397
HPDE	22.8201	0.252605	4.5	4.5	1526.22	0.313064
HPDE	23.8299	0.382605	77	75.5	3572.99	0.222433
HPDE	21.7341	0.206315	10.5	9	1347.11	0.413232
HPDE	23.2347	0.273935	20.5	20	3081.87	0.240622
HPDE	21.1402	0.201868	13.5	10	2356.24	0.333191
HPDE	14.9696	0.204705	12.5	11.5	2319.63	0.332237
HPDE	20.4046	0.226518	13	8.5	1189.2	0.43635
HPDE	21.9092	0.223583	29	25	4317.01	0.216399
HPDE	23.2347	0.23041	3	2.5	3115.29	0.179768
HPDE	21.9382	0.191336	49.5	45	7228.61	0.156576
HPDE	22.1404	0.226538	6	5	3262.01	0.2244
HPDE	20.6527	0.306805	10	6	1319.61	0.307001
HPDE	24.5147	0.287621	7.5	7.5	1063.49	0.401485
HPDE	30.1512	0.394653	593	571.5	5398.98	0.1328
HPDE	24.1484	0.285922	95	91.5	4902.52	0.21511
HPDE	22.4545	0.217618	10	8	1901	0.329965
HPDE	22.1116	0.197672	29	25	6794.96	0.13508
HPDE	22.4545	0.281848	35.5	32.5	3500.34	0.216474
HPDE	22.9314	0.276562	80.5	70.5	4902.2	0.213611
HPDE	20.4358	0.202222	12.5	7	3125.04	0.275829
HPDE	24.9777	0.329374	75.5	76	4522.2	0.15794
HPDE	22.6239	0.287257	101	93.5	4817.75	0.249224
HPDE	24.122	0.320414	87.5	85	4040.1	0.204967
HPDE	21.7048	0.224699	17.5	14.5	2357.82	0.318978
HPDE	31.4533	0.460011	9	10	1537.42	0.236991
HPDE	22.1978	0.244818	42	36.5	4834.01	0.218584
HPDE	21.8801	0.262756	121	113	5789.31	0.216828
HPDE	27.7085	0.169681	17	9.5	4763.42	0.19864
HPDE	24.3584	0.352677	28	37.5	3374.59	0.208336
HPDE	22.7082	0.27303	32.5	29.5	3970.44	0.219889
HPDE	21.5577	0.248072	47.5	45	4607.66	0.224037
HPDE	22.3977	0.392321	85.5	85	3545.19	0.24877
HPDE	26.6546	0.377676	305.5	313.5	4549.13	0.180896
HPDE	28.7903	0.288167	72	54	6989.03	0.0692203
HPDE	24.2536	0.306547	13.5	9	1616.77	0.319334
HPDE	22.1691	0.225227	26	23.5	6160.39	0.141753
HPDE	22.9036	0.127136	2	3	4750.28	0.179264
HPDE	20.3421	0.231545	315.5	302.5	8794.99	0.183022
HPDE	19.8992	0.223723	6.5	6	1264.88	0.426835
HPDE	20.6835	0.257909	11.5	11.5	5977.91	0.108163
HPDE	17.9834	0.0869425	7	6	5069.08	0.129443
HPDE	24.5666	0.32793	8.5	8.5	599.322	0.508778
HPDE	21.7341	0.279787	144	130	6417.59	0.159293
HPDE	7.73578	0.274121	222.5	215	7410.71	0.102412
HPDE	21.3797	0.260759	76.5	73	6834.79	0.142374
HPDE	25.6318	0.384632	6.5	8	2233.01	0.206927
HPDE	24.3584	0.30949	21.5	22	2142.34	0.177754
HPDE	15.6759	0.348011	338	331	5811.28	0.291243
HPDE	16.8125	0.17874	85.5	74.5	8071.08	0.135222
HPDE	7.04673	0.235805	5.5	6.5	1658.93	0.326293
HPDE	23.7228	0.30236	9	6	2531.62	0.221497
HPDE	20.9891	0.526103	3	2.5	128.899	0.594287
HPDE	14.273	0.23028	41.5	38	5884.49	0.18824
HPDE	22.3692	0.280909	28.5	21	3265.03	0.237517
HPDE	13.0619	0.569825	1026	1040	4648.25	0.191768
HPDE	22.8758	0.308473	114.5	103.5	4168.58	0.28129
HPDE	20.8063	0.193438	12.5	7.5	2535.32	0.298756
HPDE	21.5577	0.271271	148.5	125.5	5359.19	0.243264
HPDE	20.8674	0.231552	3	2	176.362	0.647815
HPDE	24.3845	0.361008	54.5	47.5	4353.31	0.121184
HPDE	24.5925	0.291963	100	89.5	4150.21	0.233904
HPDE	19.803	0.201074	3.5	2.5	217.586	0.649756
HPDE	20.7143	0.158615	63.5	52.5	5984.16	0.202375
HPDE	12.8655	0.269446	12	7.5	1467.74	0.329247
HPDE	21.1703	0.205852	15	10.5	966.538	0.501019
HPDE	21.1402	0.221128	19.5	14	1477.7	0.468041
HPDE	20.4358	0.239993	246.5	227.5	6628.79	0.275858
HPDE	17.9125	0.075214	9	6.5	2148.9	0.188075
HPDE	19.0826	0.172612	34	30.5	5980.31	0.206686
HPDE	13.2073	0.472576	475	430	4353.04	0.157255
HPDE	15.5536	0.228003	1.5	2.5	308.047	0.56135
HPDE	21.851	0.255728	92	82.5	6506.52	0.17461
HPDE	22.054	0.297275	208.5	184	4194.52	0.371413
HPDE	15.5126	0.238818	137.5	116	7311.14	0.157127
HPDE	22.5394	0.285601	50.5	48.5	3758.07	0.256003
HPDE	13.9116	0.210015	126	112.5	6928.12	0.217416
HPDE	14.8415	0.382046	20	19	1289.86	0.399542
HPDE	20.8063	0.210476	17	12	2009.32	0.36633
HPDE	13.3988	0.24492	4.5	2.5	598.622	0.446091
HPDE	26.0995	0.416904	326	296	4400.62	0.19854
HPDE	17.5535	0.41225	374.5	372.5	3802.47	0.281278
HPDE	21.7048	0.213614	19	16.5	4664.92	0.188223
HPDE	27.1281	0.360589	1818.5	1586	6274.4	0.236957
HPDE	24.3584	0.263244	53	56	5908.99	0.125815
HPDE	22.4261	0.244938	26.5	24	3631.91	0.267618
HPDE	23.1524	0.225667	131.5	116.5	6600.56	0.179109
HPDE	24.6958	0.272046	4	3.5	2453.3	0.210826
HPDE	23.7764	0.320345	2.5	2	297.784	0.494868
HPDE	27.7545	0.342754	23	25	4348.01	0.097902
HPDE	15.7165	0.331032	3.5	3	1384.52	0.27136
HPDE	22.2837	0.207507	7	5	3161.88	0.232597
HPDE	22.8201	0.251609	6	4.5	5652.44	0.100245
HPDE	21.3797	0.239722	368	346.5	6384.79	0.305898
HPDE	13.159	0.239041	3	5.5	4903.21	0.116201
HPDE	24.67	0.287358	4.5	3	578.148	0.445031
HPDE	23.3986	0.269876	17	15.5	3504.33	0.175646
HPDE	23.4529	0.334723	5	4.5	3778.85	0.114869
HPDE	25.2061	0.319757	7	6	966.36	0.387676
HPDE	23.2347	0.521731	5	3.5	213.162	0.537818
HPDE	25.3572	0.360263	6.5	6.5	2712.13	0.15958
HPDE	24.85	0.343641	5.5	3	2541.66	0.155837
HPDE	21.0194	0.23705	22.5	15.5	2485.18	0.31047
HPDE	13.8658	0.335221	4.5	7	2329.32	0.206782
HPDE	19.5441	0.380625	31.5	35	2834.71	0.180637
HPDE	22.4261	0.271174	84.5	71	4487.58	0.237003
HPDE	24.1747	0.355555	304	314.5	5237.47	0.200961
HPDE	16.8503	0.481064	107	3.5	928.29	0.259765
HPDE	22.054	0.256124	8.5	4.5	2358.54	0.251998
HPDE	20.1851	0.218224	68	59.5	6108.01	0.207468
HPDE	19.3147	0.190204	16.5	15	4176.61	0.270814
HPDE	12.0478	0.31694	2.5	8	1934.26	0.2497
HPDE	20.4046	0.190833	22.5	19.5	5226.62	0.202781
HPDE	7.65304	0.188071	34	31.5	5380.73	0.205827
HPDE	19.674	0.211639	8.5	8	3023.55	0.285316
HPDE	13.3988	0.604075	6.5	6	880.227	0.312366
HPDE	8.13686	0.272271	36.5	35.5	4022.59	0.245694
HPDE	20.56	0.239201	49	44	4286.8	0.261371
HPDE	11.4518	0.307273	2	4	2384.77	0.198902
HPDE	12.8655	0.134838	6.5	3.5	1816.56	0.311099
HPDE	20.5291	0.198893	75.5	66	4680.8	0.283622
HPDE	19.1492	0.291346	5.5	6	2936.02	0.176886
HPDE	18.5412	0.313092	15.5	5	281.636	0.564219
HPDE	20.0902	0.251461	32.5	25.5	3077.92	0.283633
HPDE	19.7386	0.268763	47	32	3506.53	0.310758
HPDE	21.5281	0.467172	535.5	509	3391.29	0.451315
HPDE	20.6527	0.239722	66.5	58	4413.21	0.218519
HPDE	20.4046	0.269045	162	136.5	3603.14	0.302871
HPDE	18.746	0.250849	46	41.5	2786.24	0.344454
HPDE	20.4046	0.193848	12	9.5	2856.87	0.262872
HPDE	19.9311	0.193325	30	24.5	4453.41	0.228633
HPDE	22.2265	0.456822	288.5	266	2490.59	0.480798
HPDE	28.3221	0.334553	2.5	3.5	2797.26	0.155677
HPDE	27.034	0.449887	511	486.5	4630.47	0.189287
HPDE	29.2727	0.307017	134.5	128	6696.39	0.144392
HPDE	28.2771	0.204883	49.5	38	5191.05	0.218183
HPDE	26.0995	0.20759	17	13	4535.98	0.198595
HPDE	20.1851	0.295984	75	63.5	2464.98	0.414606
HPDE	19.0492	0.428156	430.5	432.5	4463.63	0.141573
HPDE	17.6619	0.294723	221	206	5857.88	0.175423
HPDE	20.3108	0.266463	9	6.5	1553.88	0.345532
HPDE	17.2977	0.175671	28.5	22	13032.9	0.0101122
HPDE	21.11	0.314014	108.5	97.5	4025.61	0.313518
HPDE	24.6183	0.57763	49	43	2611.96	0.191989
HPDE	20.0267	0.19049	13	8.5	1239.33	0.457735
HPDE	20.0267	0.24915	50	40	5193.4	0.219404
HPDE	20.4046	0.259736	88.5	66.5	3339.92	0.370049
HPDE	20.745	0.287346	201	180.5	4752.45	0.281168
HPDE	31.433	0.458651	1750.5	355.5	4142.24	0.106682
HPDE	23.0698	0.181859	81.5	75.5	13183.9	0.0192094
HPDE	21.7048	0.283596	172.5	163	5913.41	0.209895
HPDE	22.5676	0.387346	102.5	103.5	3288.64	0.32735
HPDE	21.7634	0.178772	19	15.5	5432.2	0.182598
HPDE	24.1747	0.327512	40	38	4893.15	0.0831029
HPDE	23.1524	0.431016	523	523.5	4478.58	0.229498
HPDE	18.6097	0.510553	325.5	324.5	2746.17	0.375929
HPDE	18.9823	0.319671	112	99	1520.67	0.582504
HPDE	19.5766	0.229777	111.5	101	3895.27	0.415908
HPDE	18.8476	0.150803	16	19	2485.04	0.330184
HPDE	20.5291	0.354739	139	137	4883.82	0.0989392
HPDE	22.1116	0.319794	208	168.5	3228.25	0.336998
HPDE	20.5291	0.321368	90	75.5	2366.57	0.422335
HPDE	21.8218	0.25689	9	5	1153.84	0.366956
HPDE	20.56	0.301799	55	49.5	3943.72	0.278418
HPDE	18.8814	0.25468	138	124.5	2847.9	0.390429
HPDE	13.159	0.248719	133	121.5	6916.43	0.185903
HPDE	18.746	0.254438	81	72.5	9448.72	0.0733231
HPDE	23.1799	0.336032	3.5	12.5	4456.76	0.0810644
HPDE	25.1808	0.542878	10	8.5	1092.6	0.281334
HPDE	26.4869	0.524162	3755.5	3584	5787.04	0.23723
HPDE	21.1703	0.265793	201.5	179	5178.29	0.290622
HPDE	26.8687	0.403263	2.5	3.5	955.119	0.300377
HPDE	20.8063	0.311757	143.5	128	4383.7	0.26541
HPDE	21.2003	0.237643	70	64	7406.12	0.116754
HPDE	16.6221	0.0940866	2.5	2.5	10441.4	0.0135892
HPDE	20.2166	0.198893	13.5	11	2069.56	0.37218
HPDE	20.745	0.269428	132	127.5	7013.71	0.195471
HPDE	19.4788	0.181522	41.5	40	3406.94	0.37763
HPDE	20.8979	0.23705	17	14.5	2771.44	0.28364
HPDE	22.7921	0.283752	24.5	23.5	2709.99	0.287287
HPDE	22.0828	0.343178	105.5	99.5	2613.01	0.43972
HPDE	19.3805	0.178545	112.5	105.5	7469.24	0.148825
HPDE	23.2895	0.300889	328	313.5	6363.51	0.185675
HPDE	14.4943	0.339494	42	14	5430.41	0.0525585
HPDE	17.9125	0.177396	38	34.5	5151.56	0.283694
HPDE	20.8369	0.222283	47	35.5	5861.14	0.131376
HPDE	20.4669	0.205055	3	2.5	6814.6	0.0598912
HPDE	20.4046	0.204705	52.5	47.5	6382.89	0.182366
HPDE	12.9641	0.210476	16	14	3206.23	0.29432
HPDE	19.5115	0.546765	31.5	30	1834.78	0.260382
HPDE	20.591	0.224122	46.5	43.5	7117.45	0.136742
HPDE	18.1245	0.19332	51.5	44	5044.94	0.273364
HPDE	13.2073	0.0729332	9.5	7.5	4322.67	0.23785
HPDE	22.0828	0.299761	187	176	4918.23	0.255125
HPDE	13.4935	0.234321	69.5	63	7223.02	0.141175
HPDE	21.2902	0.363945	77	84	4682.75	0.146993
HPDE	18.3687	0.239722	21.5	21	4817.49	0.201469
HPDE	18.6097	0.224268	44.5	40	8642.92	0.156677
HPDE	12.5143	0.230037	150	139	6233.87	0.205793
HPDE	19.2156	0.187656	56.5	51	6442.15	0.229364
HPDE	21.2603	0.554796	24.5	25.5	2628.47	0.185158
HPDE	13.6343	0.252431	84.5	75	5504.56	0.226401
HPDE	12.5143	0.210216	16	16.5	3303	0.294642
HPDE	13.3034	0.204705	103.5	97	7498.07	0.166249
HPDE	20.0902	0.229213	33	29.5	6848.34	0.142246
HPDE	26.0262	0.351448	23.5	23.5	4128.64	0.104967
HPDE	26.7023	0.390884	4.5	15.5	4551.69	0.0481078
HPDE	19.4461	0.218687	19.5	14	3077.76	0.305572
HPDE	17.2977	0.223328	82	69.5	3382.29	0.0777808
HPDE	21.7341	0.24271	7.5	6	1537.06	0.327549
HPDE	25.1555	0.225686	12.5	9	943.016	0.472952
HPDE	19.5766	0.187749	7	5	4184.23	0.0580412
HPDE	20.9587	0.264439	29.5	21.5	4045.08	0.195183
HPDE	19.8992	0.385691	150	146.5	3581.52	0.336495
HPDE	17.5535	0.211767	9	7.5	2120.87	0.345082
HPDE	22.8201	0.480906	542.5	534.5	3570.47	0.471643
HPDE	19.4134	0.269874	18	16.5	2322.77	0.312291
HPDE	20.9891	0.414237	217	214.5	3009.94	0.340107
HPDE	17.5897	0.357963	88.5	85	2786.62	0.222907
HPDE	21.2902	0.395652	257	240.5	2799.22	0.417565
HPDE	23.8299	0.588738	308.5	305.5	3634.13	0.195383
HPDE	13.3034	0.22604	56.5	50	5107.52	0.239105
HPDE	25.2565	0.314297	235.5	222	6980.83	0.300897
HPDE	21.1402	0.559632	591	577.5	4690.76	0.431992
HPDE	13.1106	0.53695	905.5	905.5	4274.83	0.277527
HPDE	28.0284	0.264577	11	10.5	2984.56	0.228981
HPDE	18.2295	0.15108	36	32	6541.68	0.188413
HPDE	18.746	0.47106	176	170	8849.77	0.150587
HPDE	18.5412	0.199229	156.5	146	8267.94	0.189196
HPDE	19.7708	0.378766	128.5	117	5198.75	0.24655
HPDE	21.6166	0.21241	3.5	2.5	760.568	0.425886
HPDE	24.9777	0.36658	3	3.5	2242.34	0.171026
HPDE	14.1835	0.373805	160.5	153.5	6010.97	0.079055
HPDE	17.8769	0.223328	32.5	29	3686.53	0.289155
HPDE	16.1165	0.319678	3	3	1112.31	0.307652
HPDE	13.159	0.218687	46	40	5457.41	0.210185
HPDE	21.9672	0.224385	19	16	2291.15	0.334869
HPDE	27.3617	0.561718	6.5	3.5	424.337	0.395543
HPDE	22.1978	0.20248	14.5	13	3899.2	0.234742
HPDE	22.2265	0.23028	34.5	32.5	5301.73	0.206467
HPDE	25.4324	0.31364	4	4.5	978.68	0.363914
HPDE	22.3692	0.227119	15	13.5	2325.96	0.330685
HPDE	20.56	0.178594	98.5	82.5	13498.3	0.00132475
HPDE	21.2003	0.204883	71	59.5	6323.35	0.194421
HPDE	22.054	0.268295	107	94	5658.04	0.217441
HPDE	22.2837	0.276562	35	29.5	2198.14	0.363528
HPDE	21.4095	0.271421	78.5	65.5	4170.12	0.282418
HPDE	24.8243	0.367486	296	304	4655.14	0.30495
HPDE	20.8063	0.207403	42.5	39.5	6457.91	0.180039
HPDE	19.8992	0.173416	58.5	51	4346.85	0.308945
HPDE	25.6318	0.304762	119	114	5107.7	0.214011
HPDE	20.591	0.181497	24	19.5	4340.47	0.251304
HPDE	23.4258	0.68408	26	32	1286.63	0.368809
HPDE	20.591	0.236688	86.5	81.5	7305.7	0.140125
HPDE	26.5829	0.568527	148	103	4127.15	0.180536
HPDE	22.6521	0.248983	34.5	30	5507.35	0.172624
HPDE	19.0158	0.224699	44.5	25	1514.73	0.510405
HPDE	21.851	0.240768	306	296.5	8601.61	0.152293
HPDE	19.7063	0.190665	61	44.5	3940.06	0.334608
HPDE	28.3446	0.391783	1170.5	1146.5	5473.05	0.236603
HPDE	30.8607	0.35444	238.5	228	3889.02	0.0602076
HPDE	18.6439	0.359832	178	127	6686.91	0.00179748
HPDE	25.4073	0.1973	62	57.5	8218.04	0.14615
HPDE	24.9012	0.369956	2.5	3	2845.62	0.125205
HPDE	20.248	0.461817	95	84.5	8072.58	0.196548
HPDE	21.1402	0.20742	113.5	98.5	8601.52	0.129614
HPDE	24.3584	0.568732	62.5	56.5	1632.35	0.282458
HPDE	23.3986	0.303688	260.5	253.5	6867.98	0.166339
HPDE	23.2073	0.318851	298	296	4659.47	0.321515
HPDE	23.0145	0.278803	152	148	5363.33	0.240952
HPDE	22.5111	0.319339	143	139	4194.44	0.253834
HPDE	22.4261	0.226585	73	69.5	6856.4	0.142912
HPDE	21.9672	0.237978	60.5	54	8035.42	0.12549
HPDE	20.9891	0.1516	121	107.5	10245	0.0876216
HPDE	22.4261	0.196717	47.5	43	5924.3	0.190514
HPDE	21.3201	0.313244	15	12	3171.89	0.171181
HPDE	20.4046	0.295446	3.5	2	149.71	0.620922
HPDE	21.5577	0.488684	12	8.5	459.041	0.47834
HPDE	26.4147	0.608899	4	3.5	14.461	0.960979
HPDE	21.4985	0.195897	22.5	18.5	5464.54	0.177443
HPDE	15.3061	0.313453	287.5	280	3893.66	0.37078
HPDE	12.3608	0.411078	1765.5	1749.5	6321.4	0.245261
HPDE	11.0558	0.348994	345	336	5112.34	0.283298
HPDE	15.3061	0.382385	149	147	3422.03	0.350842
HPDE	14.7123	0.218432	26	22	4753.11	0.223509
HPDE	21.3797	0.360152	500	486.5	4489.8	0.513723
HPDE	13.9573	0.161537	8	4	1999.36	0.322376
HPDE	20.3421	0.226518	14.5	11	2179.43	0.320356
HPDE	19.4788	0.202018	6.5	3.5	357.586	0.612608
HPDE	17.8055	0.525992	40	36	2375.98	0.246417
HPDE	17.7697	0.594182	9	8.5	906.96	0.294101
HPDE	18.0541	0.547752	4.5	3	386.782	0.385801
HPDE	20.498	0.61751	75.5	76	2913.78	0.125312
HPDE	29.1637	0.613197	75	54	1843.81	0.224698
HPDE	27.3152	0.636986	4	3.5	480.438	0.349668
HPDE	25.3823	0.349497	7	8.5	1817.47	0.256596
HPDE	20.248	0.239397	49	48.5	4236.26	0.264983
HPDE	21.9672	0.285741	23.5	22.5	4268.36	0.198434
HPDE	14.7986	0.294606	3	2.5	278.284	0.548414
HPDE	23.9365	0.317099	2	2.5	522.655	0.417794
HPDE	27.6395	0.396417	90	92	4326.68	0.144043
HPDE	26.2939	0.423382	13.5	14	2001.77	0.238765
HPDE	22.2837	0.373046	163.5	160.5	2958.74	0.381649
HPDE	20.4358	0.242269	17	17.5	1824.64	0.401527
HPDE	21.6166	0.233245	21	20	3167.92	0.26496
HPDE	21.0799	0.185705	6.5	6.5	1854.4	0.333726
HPDE	21.3499	0.278103	72	69.5	4744.35	0.199699
HPDE	19.7708	0.357945	2.5	2	197.084	0.554919
HPDE	20.0902	0.210598	7.5	6.5	3831.97	0.203842
HPDE	19.9949	0.201724	31	29.5	5058.91	0.215987
HPDE	20.0585	0.320294	60	55.5	3222.93	0.318454
HPDE	21.4689	0.366873	113.5	107.5	2549.71	0.425464
HPDE	7.48482	0.175621	27.5	19.5	3877.07	0.269257
HPDE	21.11	0.257029	25.5	24.5	3720.14	0.240742
HPDE	19.8672	0.24404	52	49	5868.08	0.211076
HPDE	20.3421	0.553675	20	18.5	2080.79	0.178382
HPDE	14.7555	0.12699	3	6	4396.15	0.0632744
HPDE	15.389	0.112269	9	6.5	1845.77	0.212808
HPDE	17.4808	0.205155	9.5	6.5	434.158	0.431763
HPDE	13.8198	0.596112	25.5	19	6029.52	0.121398
HPDE	13.1106	0.644485	2	3.5	179.806	0.510856
HPDE	22.1978	0.174113	7.5	6	3355.36	0.102173
HPDE	16.0769	0.335353	113.5	105.5	3089.94	0.33501
HPDE	20.3734	0.456538	816	807.5	4679.54	0.0654189
HPDE	16.8125	0.202013	80	74.5	6288.44	0.204209
HPDE	13.8658	0.297466	14.5	11	2097.06	0.266332
HPDE	32.8976	0.296052	271	269.5	8782.88	0.00366694
HPDE	18.1946	0.463131	400.5	83.5	6177.83	0.0115707
HPDE	15.4304	0.382631	133.5	134.5	4651.7	0.0532912
HPDE	12.1005	0.280884	80	82.5	5014.09	0.198614
HPDE	19.116	0.252471	199	188.5	6068.26	0.292527
HPDE	19.3477	0.28201	112.5	107.5	3512.04	0.40003
HPDE	21.4095	0.209373	44.5	43.5	4906.17	0.220997
HPDE	21.5577	0.258771	17	15	3318.16	0.228144
HPDE	20.248	0.234563	72.5	70.5	4873	0.226418
HPDE	22.2265	0.3127	85	78.5	3756.54	0.236119
HPDE	21.7048	0.266215	106.5	100.5	3960.78	0.27355
HPDE	19.116	0.224085	286	274.5	3548.88	0.123527
HPDE	18.6097	0.172087	17.5	15.5	3639.84	0.266929
HPDE	25.8298	0.401454	30	31.5	3370.6	0.184234
HPDE	20.3108	0.281931	101.5	92.5	4449.86	0.256892
HPDE	21.0799	0.210653	35	31.5	5785.56	0.178199
HPDE	21.5872	0.336215	2.5	2	1058.29	0.285662
HPDE	19.2487	0.173945	2	2	198.147	0.640881
HPDE	20.4669	0.288651	101.5	95.5	5329.55	0.194808
HPDE	28.546	0.170657	5.5	4.5	3125.38	0.227237
HPDE	19.4134	0.232863	22	14.5	2684.81	0.289396
HPDE	26.1482	0.319357	153	147	5303.93	0.192168
HPDE	20.56	0.291495	85.5	76.5	3479.42	0.295567
HPDE	20.3734	0.280884	65.5	60.5	3785.82	0.272373
HPDE	21.2303	0.33164	140.5	138	4167.47	0.274703
HPDE	25.4073	0.352629	22.5	26	3493.79	0.170603
HPDE	22.054	0.239879	12	11.5	1462.91	0.387924
HPDE	19.9949	0.172636	70	67	6776.67	0.158703
HPDE	20.0267	0.228947	81	73.5	6381.77	0.187646
HPDE	19.5766	0.234542	19.5	18	4389.41	0.245424
HPDE	21.3797	0.444681	291	282.5	3522.08	0.360775
HPDE	20.4358	0.193848	42.5	41	5724.65	0.177257
HPDE	19.6416	0.172727	8.5	7	1566.2	0.404018
HPDE	20.9891	0.283068	86	80.5	4911.92	0.21382
HPDE	13.3988	0.167143	33.5	32	6195.08	0.185345
HPDE	20.5291	0.169681	47	36.5	4455.55	0.269774
HPDE	19.9311	0.236762	32	29.5	3690.69	0.287862
HPDE	18.9823	0.297819	30.5	26.5	2447.17	0.402157
HPDE	23.0422	0.17339	48.5	41.5	7580.36	0.170502
HPDE	10.7047	0.348526	45	63.5	3980.1	0.16079
HPDE	19.8351	0.213318	29	22.5	3913.94	0.244463
HPDE	20.3108	0.175975	8.5	7.5	3478.22	0.227799
HPDE	19.9949	0.204883	55.5	48.5	3039.18	0.374603
HPDE	22.7362	0.288975	6	2	6080.09	0.0296936
HPDE	27.7085	0.339219	5.5	5.5	4210.62	0.0794283
HPDE	18.678	0.178831	31	28	5086.1	0.252523
HPDE	21.6461	0.248517	43.5	43.5	3784.02	0.222364
HPDE	21.4985	0.263793	50	45.5	3737.72	0.249546
HPDE	20.6527	0.228947	54.5	51	4956.34	0.235892
HPDE	21.0799	0.224085	45	44	4282.09	0.273041
HPDE	18.9823	0.337867	190.5	183	1694.03	0.736267
HPDE	22.4261	0.368904	925	890	6138.61	0.297262
HPDE	25.731	0.431095	131.5	125	1549.69	0.608007
HPDE	19.9949	0.231545	11	9.5	3386.41	0.218814
HPDE	11.6174	0.334067	18.5	25	2052.61	0.311488
HPDE	22.6239	0.275189	15	14.5	1990.48	0.32411
HPDE	11.2838	0.375545	341.5	336	3697.67	0.395712
HPDE	18.5755	0.453179	24.5	15.5	328.201	0.615347
HPDE	21.3201	0.224744	69	67.5	6217.9	0.168615
HPDE	17.5535	0.209607	60	54.5	3543.93	0.393003
HPDE	28.2546	0.213153	28	14	8329.97	0.0997314
HPDE	18.2644	0.160951	80	71	8479.34	0.199493
HPDE	21.3499	0.285461	114.5	112	6175.28	0.163172
HPDE	20.0267	0.223561	46	41.5	5457.48	0.214538
HPDE	21.4392	0.214377	16	13	4019.17	0.186542
HPDE	19.116	0.196063	27	27	4256.34	0.271063
HPDE	20.4669	0.20742	85	80.5	4659.92	0.321926
HPDE	19.2818	0.277652	72.5	69.5	2431.23	0.461306
HPDE	21.11	0.227206	69	67.5	7957.97	0.0803655
HPDE	20.745	0.384112	232	225	2107.54	0.571513
HPDE	22.9036	0.276723	2	2	955.536	0.332584
HPDE	22.2837	0.256129	3	2.5	2565.21	0.192001
HPDE	20.6835	0.371507	68.5	66.5	2296.6	0.41987
HPDE	22.9868	0.305269	355	360	6702.38	0.181247
HPDE	25.7804	0.407984	39.5	45	4031.23	0.0951158
HPDE	25.1302	0.383013	265.5	271	4817.94	0.149057
HPDE	21.4689	0.28117	41	36	3686.95	0.155265
HPDE	22.3977	0.294989	173	153.5	5751.81	0.227403
HPDE	25.4073	0.326972	4	4	1804.85	0.241558
HPDE	22.6239	0.244111	7	4	1136.59	0.351863
HPDE	21.2902	0.207517	17.5	15.5	2592.09	0.360378
HPDE	23.6152	0.308328	307.5	304.5	5220.53	0.287973
HPDE	21.5281	0.20897	61	46.5	8180.64	0.131996
HPDE	20.6835	0.153133	70.5	57.5	6907.33	0.209955
HPDE	20.7143	0.23611	73	61	4874.11	0.284183
HPDE	26.9869	0.0224174	13	12.5	4275.18	0.102447
HPDE	19.7063	0.196144	11.5	9	1139.61	0.463382
HPDE	23.0145	0.223959	5.5	4	698.127	0.476946
HPDE	19.6091	0.201074	5	3	3860.21	0.211817
HPDE	20.9891	0.239397	39.5	28.5	5488.73	0.181248
HPDE	19.9311	0.321949	8.5	2.5	2499.36	0.145955
HPDE	31.6751	0.290004	2	8	3613.49	0.0983113
HPDE	21.9672	0.269183	147.5	88	7301.19	0.109931
HPDE	20.745	0.239397	102	89	6107.01	0.217388
HPDE	20.1851	0.240306	43.5	39	3678.28	0.27046
HPDE	22.4261	0.311589	256.5	237	4092.04	0.387282
HPDE	21.3499	0.227184	16.5	13.5	3594.39	0.23778
HPDE	20.591	0.191543	70	59	5626.61	0.216765
HPDE	23.2073	0.312157	214.5	210.5	4605.22	0.278719
HPDE	20.3421	0.234603	17	11	4515.37	0.208048
HPDE	20.248	0.1875	24.5	18	2837.81	0.339745
HPDE	19.8351	0.194175	24	18	5066.12	0.226487
HPDE	20.7757	0.264268	8	6.5	1766.2	0.313649
HPDE	20.56	0.221883	23.5	17.5	2225.93	0.362554
HPDE	21.3499	0.244433	68	61	5199.47	0.23232
HPDE	19.9631	0.216887	12.5	8	3130.07	0.282184
HPDE	19.1492	0.336445	10	7.5	99.2287	0.844725
HPDE	24.2273	0.370303	39	34	2064.41	0.28618
HPDE	21.3499	0.222214	2.5	2.5	199.884	0.63045
HPDE	22.054	0.269379	82.5	75	4461.9	0.258894
HPDE	24.4106	0.316594	83.5	60	4019.43	0.182442
HPDE	20.4358	0.218558	55.5	50	6129.21	0.220226
HPDE	22.8479	0.277197	40.5	38	3076.53	0.28062
HPDE	20.9891	0.259906	71.5	64	3568.83	0.333427
HPDE	20.6527	0.199277	32	25.5	2914.24	0.333433
HPDE	20.4669	0.33609	13	9.5	865.452	0.422158
HPDE	23.6152	0.337014	164	148.5	4361.44	0.243331
HPDE	20.8063	0.191134	16	12	1048.26	0.509116
HPDE	20.3421	0.215737	8	5.5	1821.3	0.34321
HPDE	26.7262	0.360458	9.5	9.5	2701.66	0.180052
HPDE	20.6835	0.224385	63	58.5	5482.86	0.235281
HPDE	22.3408	0.313989	73.5	56.5	4520.36	0.213372
HPDE	21.2303	0.278803	75	70.5	3070.49	0.354121
HPDE	29.0544	0.0532792	23	23.5	5309.61	0.0607601
HPDE	23.4258	0.448162	7	6	272.973	0.609123
HPDE	20.591	0.167529	20	16	9426.19	0.0683997
HPDE	18.9823	0.110952	92	75	8564.7	0.204094
HPDE	32.6841	0.513428	12	12	2675.9	0.15091
HPDE	26.2454	0.221373	11.5	13.5	4517.12	0.206656
HPDE	20.1219	0.417421	133	69	5032.52	0.0419561
HPDE	22.3408	0.430697	228	178.5	4311.78	0.0938742
HPDE	20.1219	0.182349	30	24.5	7617.46	0.146671
HPDE	20.3734	0.224042	52.5	47.5	6251.29	0.197566
HPDE	20.8979	0.252431	204.5	187	6875.35	0.244723
HPDE	20.1219	0.215737	99	81	7366.01	0.179871
HPDE	21.0799	0.196374	57	51.5	8757.72	0.105981
HPDE	18.2644	0.290805	4	8	3331.44	0.168622
HPDE	18.4724	0.389431	1210.5	611.5	5210.09	0.0156791
HPDE	22.1116	0.232847	34.5	36.5	5081.09	0.192061
HPDE	12.9641	0.203403	17	15.5	4345.31	0.229906
HPDE	11.8882	0.187717	57	24	6278.04	0.110868
HPDE	19.9311	0.166982	42	34.5	7676.52	0.181484
HPDE	12.2573	0.341123	313.5	282	3819.21	0.463125
HPDE	20.591	0.229364	200	183	7495.83	0.210099
HPDE	12.3608	0.337122	284.5	267	3152.6	0.51168
HPDE	20.1219	0.202898	36.5	33	5267.8	0.222614
HPDE	15.2227	0.297752	217	196	7146.2	0.0347191
HPDE	14.4943	0.188397	21	13.5	1212.45	0.510412
HPDE	20.8674	0.171072	30.5	27	6073.06	0.170517
HPDE	13.2555	0.208742	11	8	536.345	0.601427
HPDE	22.1978	0.234133	8	6	691.772	0.496105
HPDE	21.0194	0.271188	108	98	4178	0.333995
HPDE	25.2313	0.273383	6.5	12.5	1844.93	0.3582
HPDE	21.851	0.278059	58	53	5330.61	0.175866
HPDE	23.8032	0.338782	9	8.5	1196.21	0.365408
HPDE	14.3619	0.17879	74	62.5	5726.3	0.264639
HPDE	20.2795	0.204696	91	77	6915.77	0.214249
HPDE	13.8658	0.277197	56.5	48.5	3152.91	0.312087
HPDE	28.9666	0.236668	90	79.5	6056.51	0.25105
HPDE	28.232	0.437749	2511.5	2397.5	5935.54	0.268713
HPDE	18.1595	0.205192	65.5	51.5	4440.58	0.342801
HPDE	19.7386	0.26442	111.5	96.5	8293.05	0.14797
HPDE	21.9382	0.303045	84	73.5	4088.17	0.251188
HPDE	24.3322	0.617711	409.5	405	3943.06	0.0819843
HPDE	22.0251	0.297466	2.5	2.5	629.693	0.413197
HPDE	20.1535	0.190401	28.5	21	4374.26	0.224494
HPDE	8.51908	0.298727	175	161.5	4868.68	0.223929
HPDE	13.3988	0.184553	49	41	8940.53	0.0998551
HPDE	20.2795	0.213126	65	60.5	6679.49	0.189958
HPDE	20.745	0.192479	17.5	14	3746.14	0.210335
HPDE	23.8566	0.295438	7.5	5.5	5715.13	0.0466396
HPDE	21.3499	0.223779	8	6	2203.31	0.301801
HPDE	22.7082	0.279446	3.5	2.5	5740.82	0.0594783
HPDE	19.0492	0.187656	31	27.5	3146.1	0.344945
HPDE	23.6152	0.277762	4.5	4	4305.43	0.123276
HPDE	24.4887	0.342968	286.5	290	6382.82	0.155067
HPDE	21.7048	0.302631	46	34.5	4104.86	0.180434
HPDE	21.8801	0.288904	249.5	221.5	5596.65	0.264406
HPDE	19.5766	0.186807	139	120	6677.73	0.240346
HPDE	21.4392	0.249554	110	97.5	6182.14	0.220178
HPDE	21.1703	0.226605	135	109.5	4460.25	0.28629
HPDE	20.5291	0.360442	90	55.5	5922.6	0.011638
HPDE	19.803	0.187557	70	52	4845.44	0.353874
HPDE	21.2003	0.293953	306	267	6054.18	0.295409
HPDE	22.0251	0.33257	36	24.5	1960.2	0.356977
HPDE	20.8674	0.106874	48.5	37	4067.35	0.331364
HPDE	22.8201	0.244818	147.5	141	6772.85	0.208
HPDE	25.6318	0.147913	142.5	108.5	14391.1	0.04064
HPDE	21.6755	0.312113	285.5	243	5711.35	0.276541
HPDE	13.3512	0.347848	17	14	591.138	0.541851
HPDE	20.9283	0.156856	46	33	5316.67	0.233909
HPDE	19.7386	0.169663	77	57	7332.94	0.220054
HPDE	25.0032	0.371448	68	69.5	5190.23	0.0564659
HPDE	21.7048	0.294163	258.5	187.5	5965.06	0.276703
HPDE	23.5342	0.284626	23.5	20	3015.74	0.245639
HPDE	18.5068	0.289951	6	4.5	76.0708	0.832231
HPDE	22.1404	0.200114	68	46.5	6427.98	0.154227
HPDE	19.6091	0.208141	63	36.5	5649.6	0.265665
HPDE	26.2697	0.359051	213.5	204	4449.46	0.179705
HPDE	20.7143	0.241666	61	52	6690.52	0.174227
HPDE	23.7228	0.309419	152	121.5	4521.34	0.255962
HPDE	20.8979	0.168739	19.5	11.5	2576.75	0.345136
HPDE	24.0427	0.527144	40	39.5	3552.01	0.125883
HPDE	23.9631	0.300921	286	220	4851.42	0.281795
HPDE	21.6166	0.198847	58.5	37	3732.36	0.297767
HPDE	19.5115	0.571104	123.5	95	2447.19	0.182158
HPDE	28.5237	0.416446	30.5	40	3497.51	0.157195
HPDE	17.7339	0.151552	49	36.5	1022.18	0.600375
HPDE	21.0194	0.191052	101.5	69	7634.47	0.158567
HPDE	21.1402	0.211053	96.5	63.5	7430.8	0.158188
HPDE	18.9487	0.209942	105.5	77.5	10354	0.142101
HPDE	14.0935	0.301035	4	2	69.8458	0.738825
HPDE	15.8777	0.290521	20.5	13	4059.95	0.125851
HPDE	16.6603	0.292547	29	22	1882.12	0.325125
HPDE	14.5819	0.33739	33.5	37	2943.09	0.225019
HPDE	16.6985	0.368237	285.5	286	4968.31	0.14277
HPDE	14.273	0.249088	34	23.5	4900.09	0.0309716
HPDE	15.5126	0.323766	51.5	43	2804.04	0.278912
HPDE	12.9641	0.26151	8.5	6	803.722	0.439206
HPDE	15.1388	0.660816	30	43	3383.98	0.0957276
HPDE	17.0007	0.305728	79	68	4808.37	0.132487
HPDE	13.0619	0.238439	22.5	17	1373.14	0.455613
HPDE	16.6221	0.38086	107.5	115.5	2846.03	0.274376
HPDE	24.5925	0.342353	38.5	33.5	1683.47	0.348523
HPDE	21.2003	0.241507	7	3.5	3841.21	0.158531
HPDE	21.5577	0.188426	11	9	3105.17	0.267161
HPDE	22.8479	0.326267	68	68	2484.44	0.280384
HPDE	18.1245	0.263807	45	47.5	5115.59	0.02808
HPDE	17.2977	0.341295	111	74.5	5085.88	0.110222
HPDE	16.9257	0.236002	18.5	11	1222.51	0.428252
HPDE	16.9257	0.356433	45	44.5	4055.94	0.136759
HPDE	12.9149	0.169419	7.5	7	3172.99	0.0948954
HPDE	21.4985	0.229346	7.5	5	1152.14	0.380553
HPDE	13.8658	0.116075	21.5	19.5	4082.5	0.0559407
HPDE	15.2227	0.224343	47	44	4389.05	0.238361
HPDE	17.187	0.364584	82	82	3894.57	0.104879
HPDE	25.3572	0.402321	122	109	3177.74	0.0596899
HPDE	14.7986	0.207213	24	11	1375.3	0.444436
HPDE	12.7162	0.602328	9	8.5	330.981	0.528782
HPDE	14.4062	0.174346	17	18.5	1796.77	0.243942
HPDE	15.6759	0.287358	16.5	15	2934.67	0.206919
HPDE	24.6183	0.644655	8	7	613.687	0.334395
HPDE	21.7634	0.197672	7.5	5.5	3145.78	0.226241
HPDE	15.6353	0.410441	21.5	22.5	1922.99	0.238258
HPDE	16.0769	0.334152	13.5	10.5	437.68	0.583901
HPDE	28.3221	0.283038	19	15	4083.38	0.0344248
HPDE	22.5111	0.346885	3	2.5	70.9658	0.737033
HPDE	25.332	0.329713	152.5	155	5252.66	0.146555
HPDE	23.1249	0.343811	6.5	5	1409.06	0.273552
HPDE	25.3572	0.311242	33.5	31.5	1729.33	0.375215
HPDE	15.1808	0.146042	8.5	5	4999.23	0.185888
HPDE	21.4985	0.227982	8.5	6	819.49	0.49339
HPDE	20.9587	0.204641	7	3	704.047	0.483557
HPDE	22.5676	0.257566	38.5	32	3959.9	0.260898
HPDE	15.7165	0.497057	39.5	47.5	2349.21	0.172645
HPDE	23.5342	0.295138	14	11.5	1144.03	0.416232
HPDE	21.851	0.27431	37.5	23	5559.37	0.119733
HPDE	31.4735	0.629894	9.5	14	2640.22	0.103275
HPDE	28.4566	0.587063	55	55	3607.57	0.22197
HPDE	22.5394	0.593756	1.5	5.5	23.0461	0.957853
HPDE	13.8658	0.251897	1.5	2.5	6200.84	0.0360956
HPDE	24.122	0.286044	15.5	14	1370.42	0.40492
HPDE	13.2555	0.319537	2.5	2	77.0536	0.703978
HPDE	25.4073	0.642602	52	54	913.049	0.49553
HPDE	22.9868	0.277619	12	10.5	2425.47	0.274858
HPDE	21.9382	0.242487	3.5	3	454.503	0.512716
HPDE	22.7362	0.22089	9.5	7	2683.93	0.245286
HPDE	22.3977	0.490534	6	6	347.441	0.495413
HPDE	29.6616	0.467651	121	106	3589.05	0.0595681
HPDE	21.9672	0.249294	6.5	5	573.429	0.488181
HPDE	21.851	0.343127	4.5	5.5	849.107	0.385922
HPDE	15.6759	0.604483	9.5	15	226.106	0.64152
HPDE	26.1726	0.345536	44	45.5	3028.57	0.208532
HPDE	25.1049	0.288974	7.5	7.5	1447.03	0.301481
HPDE	25.1808	0.20523	4	3	1001.5	0.39809
HPDE	25.4324	0.236687	3.5	3.5	417.243	0.51642
HPDE	27.1515	0.286296	9	7	1442.12	0.320911
HPDE	24.2798	0.280742	11	8.5	1534.75	0.318449
HPDE	24.85	0.279579	8.5	8	816.455	0.44882
HPDE	19.9311	0.357731	46	51.5	4066.28	0.111941
HPDE	19.9631	0.288419	20	7	9290.72	0.00994419
HPDE	21.6755	0.209938	8	6.5	252.15	0.71929
HPDE	24.67	0.223684	9	7	950.795	0.445066
HPDE	22.8758	0.230154	6.5	5	3125.92	0.180284
HPDE	22.9868	0.263336	12.5	10.5	1134.33	0.435124
HPDE	20.1851	0.637827	25	23.5	2732.13	0.165231
HPDE	21.4095	0.21776	3.5	2.5	1634.96	0.306592
HPDE	23.6691	0.305134	15.5	14.5	872.253	0.482408
HPDE	33.8137	0.266345	15.5	6	6242.04	0.0590537
HPDE	24.85	0.273671	6.5	7	2147.1	0.24412
HPDE	23.7228	0.348811	14	13.5	2469.93	0.249589
HPDE	23.3713	0.322546	6.5	5.5	661.716	0.450926
HPDE	25.5572	0.555356	35	33	2443.09	0.141373
HPDE	22.4261	0.240754	6.5	5	6479.34	0.0621746
HPDE	21.6755	0.230495	24	14.5	1263.01	0.486676
HPDE	22.7921	0.249372	12	13	5226.77	0.114872
HPDE	26.1969	0.597469	136.5	129	2548.01	0.261562
HPDE	25.3572	0.326274	75	74.5	5943.9	0.102743
HPDE	13.4935	0.412061	10	8.5	1041.42	0.314341
HPDE	22.1691	0.194859	8	3	158.107	0.723479
HPDE	21.4985	0.233139	22.5	15	3982	0.215547
HPDE	23.3441	0.441781	4	3.5	356.033	0.457147
HPDE	20.0585	0.229389	8	5	227.744	0.708307
HPDE	22.9591	0.749195	30	10.5	60.9226	0.835363
HPDE	24.306	0.372114	34.5	32.5	2618.61	0.26179
HPDE	21.9962	0.413813	22	19.5	3013.29	0.0792313
HPDE	25.6567	0.380899	16	14.5	1082.3	0.381291
HPDE	24.5406	0.441324	26.5	24	1214.01	0.35457
HPDE	16.1559	0.160972	119.5	106.5	4060.85	0.199083
HPDE	21.1402	0.239761	7.5	4	216.679	0.663286
HPDE	21.1402	0.221578	13.5	9	1377.71	0.413377
HPDE	20.7757	0.570733	17	10	1209.03	0.260072
HPDE	23.1249	0.29461	11.5	11	2159.81	0.264328
HPDE	14.9696	0.530427	31.5	25	1688.6	0.224053
HPDE	21.6166	0.516802	18	16.5	1653.59	0.209303
HPDE	26.0995	0.190833	5.5	5.5	1876.94	0.326737
HPDE	23.9897	0.354674	18	18	1152.4	0.406526
HPDE	31.2502	0.312006	32.5	22	3566.15	0.186263
HPDE	22.1978	0.321593	9	6	791.673	0.413608
HPDE	28.5237	0.345906	27.5	28	4076.35	0.147672
HPDE	20.745	0.201724	7	4.5	1444.79	0.359016
HPDE	16.5453	0.384468	13.5	10.5	463.574	0.533805
HPDE	23.1799	0.372195	12	10.5	1290.11	0.342179
HPDE	25.2565	0.422861	9	7	1244.56	0.276534
HPDE	21.6755	0.510244	5	3	179.986	0.524282
HPDE	24.7987	0.33704	9	14	834.721	0.420886
HPDE	24.8243	0.315526	15.5	15.5	2224.46	0.25852
HPDE	25.7804	0.372726	124.5	117.5	3626.21	0.21056
HPDE	29.7901	0.376157	127	131	4625.04	0.0921407
HPDE	24.3845	0.567683	11	10.5	1557.86	0.204312
HPDE	26.7023	0.370283	44.5	43	2629.21	0.269848
HPDE	27.8461	0.376243	70.5	70.5	5101.06	0.0639858
HPDE	22.8758	0.28161	4.5	3.5	790.577	0.397778
HPDE	26.6785	0.356665	15.5	11.5	1738.7	0.312884
HPDE	24.9522	0.352164	62	63	3885.63	0.179175
HPDE	21.3499	0.31963	2.5	2.5	20.4913	0.961978
HPDE	23.2073	0.276626	7.5	6	2000.1	0.257427
HPDE	21.3499	0.567296	47	56	2749.63	0.106454
HPDE	16.5453	0.426123	19	19.5	3175.55	0.116169
HPDE	22.8758	0.241666	55.5	23	782.914	0.579314
HPDE	24.2536	0.335863	6.5	11	2984.25	0.0915814
HPDE	15.9177	0.301271	21	18	2079.52	0.318586
HPDE	26.6307	0.438704	3	2.5	32.7714	0.816786
HPDE	16.8125	0.250646	4	2.5	3614.69	0.158066
HPDE	17.3712	0.346526	58	61.5	4503.22	0.130104
HPDE	17.0755	0.341566	21.5	27	3563.15	0.153237
HPDE	16.6221	0.678638	37.5	38.5	1471.62	0.241503
HPDE	17.2977	0.287736	6.5	5	2731.44	0.191134
HPDE	16.3128	0.294024	18	18	3235.82	0.200764
HPDE	15.757	0.184692	8	5.5	703.093	0.508177
HPDE	18.746	0.328621	77.5	71.5	5360.1	0.0943475
HPDE	20.591	0.301517	91	92	5313.38	0.154569
HPDE	22.054	0.286529	68	60.5	6044.77	0.131133
HPDE	22.5676	0.155814	24.5	22.5	5453.73	0.0378807
HPDE	14.8415	0.20248	6	3	385.211	0.56491
HPDE	18.0893	0.255853	10.5	8	1166.03	0.400407
HPDE	16.9633	0.283303	79	79.5	1404.8	0.493979
HPDE	17.5535	0.142278	9.5	3.5	5276.07	0.146044
HPDE	15.757	0.243065	6.5	5	999.178	0.393707
HPDE	15.2644	0.218894	7.5	5	3048.19	0.22582
HPDE	21.0496	0.17263	10.5	9.5	2160.06	0.348805
HPDE	28.8565	0.335806	69.5	71.5	4441.39	0.134072
HPDE	16.4294	0.448714	13	14	2086.02	0.183845
HPDE	14.5381	0.312945	31.5	45	4729.83	0.118127
HPDE	23.7496	0.304361	32	33.5	4135.71	0.146167
HPDE	11.7265	0.24884	11.5	10	2150.63	0.239314
HPDE	16.1559	0.636274	14	16	1819.83	0.18909
HPDE	14.5819	0.200133	6	4.5	2528.83	0.251682
HPDE	18.2295	0.303838	14.5	12	2924.19	0.1878
HPDE	35.3959	0.504373	731.5	697	4374.19	0.113747
HPDE	16.1165	0.243444	11	7.5	1353.88	0.385315
HPDE	24.6958	0.595576	14.5	12	695.844	0.396385
HPDE	12.666	0.611703	21.5	23	923.316	0.393538
HPDE	12.1005	0.27443	9.5	8.5	727.875	0.498195
HPDE	17.4443	0.300659	10.5	9.5	1383.03	0.327445
HPDE	12.9641	0.288018	14	9.5	295.591	0.689893
HPDE	15.6759	0.271922	7.5	5	608.679	0.493533
HPDE	15.9975	0.289648	6	4	574.965	0.461916
HPDE	15.0967	0.211053	4.5	3	749.987	0.432098
HPDE	14.7123	0.320374	16	15.5	1671.21	0.346911
HPDE	14.0935	0.706277	37.5	48	2014.98	0.183803
HPDE	17.8412	0.366365	40	38.5	2766.52	0.240684
HPDE	25.4324	0.355069	12	11.5	1682.18	0.271488
HPDE	22.4261	0.226458	3.5	2	672.755	0.413843
HPDE	24.201	0.681173	16	17	691.156	0.388254
HPDE	20.0902	0.218641	8.5	3.5	1290.04	0.363296
HPDE	22.2551	0.277169	14.5	7.5	3019.42	0.188984
HPDE	24.306	0.323332	29.5	30.5	2840.69	0.23569
HPDE	21.6166	0.213552	9	6.5	1779	0.328688
HPDE	15.9975	0.360423	21	24.5	3526.44	0.138082
HPDE	14.7555	0.26615	9	4.5	109.634	0.790388
HPDE	21.3201	0.253053	33	22.5	2414.63	0.315189
HPDE	13.9116	0.506949	1009.5	931.5	4368.29	0.0329977
HPDE	20.591	0.182548	6	3.5	816.363	0.440028
HPDE	16.5837	0.65367	166	161.5	2891.03	0.117135
HPDE	26.3664	0.616924	2.5	2.5	206.442	0.462635
HPDE	23.7228	0.3344	17.5	14	713.822	0.40196
HPDE	18.1946	0.485415	5	3.5	458.642	0.344442
HPDE	24.5925	0.475729	4	3	504.589	0.368307
HPDE	24.2273	0.613249	16	14.5	151.406	0.813847
HPDE	25.4824	0.366038	14	15.5	2057.5	0.266189
HPDE	26.0507	0.273383	57	48.5	2989.69	0.198875
HPDE	23.696	0.311422	46	46.5	2714.61	0.291586
HPDE	24.4106	0.30675	15	13	1194.62	0.389674
HPDE	30.0454	0.387758	103.5	110	4652.01	0.0479252
HPDE	20.8979	0.502168	15	13.5	1085.56	0.29494
HPDE	19.9311	0.252251	7.5	6.5	1004.6	0.442332
HPDE	15.5536	0.333026	30	34	3478.15	0.195201
HPDE	35.5932	0.392963	79.5	56.5	3740.8	0.115423
HPDE	21.7048	0.21776	11.5	9	1491.07	0.389199
HPDE	22.054	0.256074	38	30	2730.44	0.331915
HPDE	24.2273	0.320229	13.5	11	1815	0.27711
HPDE	28.8124	0.648667	24.5	21.5	4513.86	0.0672891
HPDE	32.2724	0.481051	172	102	3997.48	0.127432
HPDE	26.4869	0.384495	32	37	3254.91	0.182085
HPDE	20.9283	0.210347	6	3.5	562.854	0.520477
HPDE	24.8243	0.330687	37.5	49	3767.97	0.179314
HPDE	20.6527	0.235975	4.5	3	182.278	0.673168
HPDE	22.1116	0.367302	27.5	15	256.566	0.788261
HPDE	23.3986	0.296916	6.5	3	382.032	0.482936
HPDE	27.9829	0.369917	59	53	4673.37	0.0683844
HPDE	21.851	0.260529	22	13	1377.43	0.421157
HPDE	22.6239	0.272436	3.5	2.5	118.536	0.680439
HPDE	22.2551	0.60325	21	13	1056.18	0.306433
HPDE	32.1142	0.302672	19.5	9	3846.6	0.131483
HPDE	21.7048	0.236895	6	3.5	466.684	0.504048
HPDE	33.1674	0.424873	21.5	25.5	3658.99	0.0880188
HPDE	22.8479	0.243944	14.5	11	1142.5	0.429743
HPDE	21.4689	0.630887	13.5	9	341.179	0.512393
HPDE	26.4147	0.63145	40	41	1413.23	0.295945
HPDE	24.6958	0.305134	9	9.5	1668.1	0.293354
HPDE	23.2621	0.268503	13.5	9	77.8804	0.877739
HPDE	16.3907	0.681122	16.5	15.5	610.288	0.436878
HPDE	21.5577	0.224399	25.5	11	1337.47	0.459496
HPDE	23.1524	0.282696	25	18.5	1370.43	0.424451
HPDE	22.4545	0.236688	7.5	4.5	741.258	0.463692
HPDE	13.0131	0.274953	4.5	4.5	101.793	0.788044
HPDE	23.0422	0.259728	6.5	6	879.008	0.411199
HPDE	17.9125	0.539873	29	33	2275.54	0.164785
HPDE	22.1404	0.267543	16	12	2340.3	0.301674
HPDE	24.67	0.0409761	26.5	17.5	2501.47	0.147914
HPDE	24.1747	0.306346	83	78	5896.35	0.0358518
HPDE	21.7341	0.257909	30.5	11.5	729.357	0.560835
HPDE	15.8376	0.470886	23.5	22.5	1730.72	0.253145
HPDE	21.8218	0.269736	22	16	1191.86	0.464638
HPDE	35.4318	0.502284	392.5	399.5	4032.03	0.0191289
HPDE	23.9631	0.311439	44	42	4296.58	0.150615
HPDE	15.0545	0.272487	12.5	11.5	2075.91	0.30335
HPDE	24.8243	0.365692	42.5	42	3284.33	0.184399
HPDE	27.2452	0.382326	49	51	3232.96	0.179339
HPDE	25.607	0.395589	370.5	376.5	4837.91	0.159196
HPDE	13.0131	0.184983	92.5	111.5	3335.16	0.128441
HPDE	13.4462	0.24271	21	19	949.92	0.535885
HPDE	21.9672	0.298262	74.5	73	4217.05	0.217991
HPDE	13.3512	0.473424	51	52.5	1811.5	0.282915
HPDE	27.7545	0.174638	41	37.5	5622.38	0.0217152
HPDE	22.7642	0.266537	7.5	5.5	356.675	0.593482
HPDE	21.0496	0.242277	22.5	19	2446.71	0.317779
HPDE	23.6691	0.349169	11	10	1419.83	0.339621
HPDE	20.3421	0.34298	32.5	24.5	3615.97	0.157451
HPDE	22.3123	0.404469	19	20.5	3443.87	0.108721
HPDE	25.4324	0.269126	48	28.5	2643.47	0.271681
HPDE	21.7048	0.240754	9.5	8.5	759.506	0.499395
HPDE	23.4529	0.311262	11	9.5	2066	0.248926
HPDE	16.8125	0.380629	148	144.5	3104.29	0.221057
HPDE	21.8801	0.237112	28.5	21	1908.35	0.384553
HPDE	24.4627	0.31568	33	9	6083.21	0.0271405
HPDE	24.4887	0.31268	60.5	63.5	4046.76	0.179066
HPDE	24.3584	0.318008	48	46	3285.07	0.237665
HPDE	23.2347	0.359947	55	58.5	3836.87	0.149095
HPDE	12.1005	0.44563	85.5	79	3428.22	0.128312
HPDE	21.1703	0.558383	12.5	11	1204.66	0.276094
HPDE	29.2292	0.407797	56.5	52.5	2977.31	0.204306
HPDE	22.5676	0.249003	6	3.5	276.244	0.600499
HPDE	25.4324	0.349978	11	10	1579.34	0.28793
HPDE	24.3584	0.314011	7	5	468.804	0.490735
HPDE	24.5147	0.331593	45.5	16.5	3439.61	0.155504
HPDE	25.2313	0.336683	14.5	10.5	2024.22	0.242974
HPDE	23.2073	0.274524	10.5	9	140.469	0.848348
HPDE	20.0267	0.453665	13	9	247.065	0.63887
HPDE	21.2303	0.271387	6	3	128.736	0.702109
HPDE	26.5349	0.370763	158	163.5	5037.11	0.119043
HPDE	30.6952	0.272216	12	5	1101.82	0.360145
HPDE	22.8201	0.382508	9	4.5	257.548	0.573299
HPDE	25.5074	0.344691	10.5	11	1614.65	0.294236
HPDE	21.8801	0.493965	54	51	1977.28	0.328797
HPDE	11.8882	0.599417	27	28.5	3821.56	0.153251
HPDE	23.8566	0.306346	77.5	75	4454.97	0.194734
HPDE	17.6979	0.330817	8	3.5	4607.32	0.0720389
HPDE	22.054	0.245759	5	3	122.918	0.723776
HPDE	22.7082	0.261053	15.5	8	576.969	0.532955
HPDE	24.7215	0.319678	10.5	11.5	2165.01	0.240114
HPDE	27.2218	0.328081	84	85	2782.51	0.3158
HPDE	20.4358	0.257596	26.5	20.5	3392.21	0.269201
HPDE	19.2156	0.240285	5.5	3.5	323.415	0.60063
HPDE	20.9891	0.282792	9.5	9.5	1104.66	0.41748
HPDE	23.8032	0.332481	42.5	31	2980.8	0.230126
HPDE	20.6219	0.244818	10	4	957.025	0.400027
HPDE	23.7496	0.309545	7	3.5	82.6515	0.786627
HPDE	24.306	0.325287	36	36	3148.78	0.236138
HPDE	23.3168	0.300439	26	22.5	1894.94	0.368851
HPDE	21.0194	0.250426	12	7.5	4071.74	0.188751
HPDE	29.3162	0.600036	23.5	18.5	1256.05	0.303
HPDE	27.8232	0.389342	42.5	49	4257.16	0.0960617
HPDE	31.8954	0.320905	23	23.5	4661.27	0.0180559
HPDE	24.1747	0.0929977	15	9	8322.44	0.0104356
HPDE	19.674	0.166745	5	4.5	423.753	0.611546
HPDE	24.3845	0.382173	20.5	17	1492.08	0.346742
HPDE	20.5291	0.532926	21.5	19.5	871.575	0.36508
HPDE	27.4778	0.345533	16	17.5	1352.19	0.388024
HPDE	21.5577	0.305457	7.5	7.5	590.687	0.511992
HPDE	24.773	0.381653	3.5	2.5	58.4468	0.738541
HPDE	24.1484	0.446721	18	19.5	1730.24	0.267496
HPDE	30.7781	0.601632	77.5	76.5	2551.12	0.13604
HPDE	22.6521	0.196266	8.5	5.5	4489.89	0.182311
HPDE	29.8541	0.617412	81.5	78	2129.87	0.20007
HPDE	21.9672	0.278749	17	13	2240.85	0.305839
HPDE	26.9397	0.378087	32	30	2640.41	0.231861
HPDE	21.3797	0.229452	23.5	17	2422.81	0.339258
HPDE	28.367	0.671104	28.5	24	1164.58	0.313248
HPDE	24.6958	0.333641	68	78	4235.19	0.179498
HPDE	22.6801	0.402267	27	19	1619.43	0.282428
HPDE	27.9374	0.40639	57.5	60.5	2248.84	0.280361
HPDE	16.0373	0.405995	51	51	1837.38	0.33352
HPDE	21.11	0.228983	7.5	8	1645.68	0.351124
HPDE	22.7921	0.274524	33	23	1791.95	0.398482
HPDE	24.6442	0.330542	64.5	56.5	3646.89	0.202357
HPDE	23.2621	0.295138	35	25.5	2413.19	0.287229
HPDE	21.8218	0.298161	12	11.5	1482.71	0.355333
HPDE	24.4887	0.296829	59.5	51.5	3216.25	0.213646
HPDE	24.6442	0.318616	94	81.5	2481.6	0.32784
HPDE	16.8125	0.424587	4	3	52.5049	0.777173
HPDE	23.7764	0.313779	91	84.5	5338.41	0.154628
HPDE	15.9177	0.316594	45	40	2309.17	0.30011
HPDE	21.8801	0.386885	635.5	632.5	5959.32	0.0629772
HPDE	22.2551	0.234426	7.5	5.5	1525.41	0.335392
HPDE	22.6801	0.277619	17	10	1219.13	0.391356
HPDE	26.4869	0.707824	84	81	1641.35	0.312586
HPDE	23.3713	0.611	14.5	16.5	1604.96	0.217032
HPDE	10.823	0.204696	13	7	464.266	0.49327
HPDE	26.8924	0.415017	470.5	451.5	4629.16	0.152387
HPDE	26.4147	0.40639	77	59	3502.38	0.120746
HPDE	22.054	0.270441	103	96.5	4506.57	0.298959
HPDE	20.5291	0.231565	28.5	20.5	2833.8	0.289814
HPDE	21.4985	0.319493	50	40	2585.18	0.375257
HPDE	24.7215	0.391257	97	89.5	3441.29	0.195599
HPDE	18.2295	0.172612	16.5	9.5	4653.67	0.18994
HPDE	21.3201	0.570729	119.5	115.5	2420.12	0.311053
HPDE	26.0751	0.330763	105	30	4561.2	0.122351
HPDE	24.67	0.234321	12.5	10	617.323	0.61812
HPDE	20.9283	0.212848	16	12.5	836.126	0.546509
HPDE	16.0769	0.400389	17.5	19.5	3208.46	0.153442
HPDE	11.8882	0.375889	157	157.5	3653.07	0.202313
HPDE	14.2283	0.358386	4	5	54.9095	0.87033
HPDE	32.8783	0.30657	8.5	5	3940.63	0.102262
HPDE	29.0982	0.58309	70.5	68.5	4662.83	0.0167943
HPDE	21.2603	0.242205	5	2.5	49.0452	0.868357
HPDE	19.7386	0.288456	9.5	14	995.863	0.326028
HPDE	24.1484	0.383713	31	30	1053.75	0.428548
HPDE	25.7804	0.411725	45.5	57.5	2514.38	0.240398
HPDE	28.7681	0.433369	56	18	606.173	0.42556
HPDE	21.0799	0.216199	7.5	3.5	596.152	0.495191
HPDE	20.745	0.226373	22.5	15	989.142	0.539712
HPDE	23.3168	0.329737	91.5	90	4111.78	0.257411
HPDE	20.248	0.39336	6	2	37.2996	0.802067
HPDE	21.8218	0.238818	10	7.5	2815.58	0.252656
HPDE	22.0251	0.255646	17	12.5	2035.27	0.325793
HPDE	15.389	0.331442	17	15.5	1298.78	0.381586
HPDE	24.4366	0.639896	60.5	52	930.479	0.524995
HPDE	32.3316	0.630703	10.5	9	192.535	0.585814
HPDE	21.1703	0.234879	10	4.5	2793.12	0.234778
HPDE	22.6801	0.208742	13	16	158.46	0.951723
HPDE	27.7774	0.438094	4	3	950.808	0.291037
HPDE	20.9283	0.223959	7.5	5	135.14	0.790112
HPDE	27.8232	0.312006	33	11	7758.01	0.0144283
HPDE	25.607	0.369465	24.5	15.5	1109.45	0.310662
HPDE	25.0795	0.364049	123.5	119	4442.2	0.166509
HPDE	22.6801	0.320831	124	113	4711.82	0.262419
HPDE	26.0017	0.340768	94	99	1297.36	0.498032
HPDE	21.2003	0.241899	7.5	4	193.68	0.689696
HPDE	22.3692	0.303688	9	7	256.894	0.649056
HPDE	21.7926	0.249811	16	12	688.958	0.549543
HPDE	22.4261	0.293584	23.5	17	1146.43	0.458871
HPDE	22.5958	0.356991	9.5	6	205.349	0.661902
HPDE	20.8063	0.674563	47.5	49.5	1753.82	0.208793
HPDE	23.5071	0.343079	86.5	80.5	4429.6	0.0642095
HPDE	24.0162	0.335417	37.5	30.5	3196.4	0.191347
HPDE	26.1239	0.385779	34	35	3468.14	0.127878
HPDE	24.7987	0.346979	42	15	5339.22	0.0817735
HPDE	11.7265	0.637615	90.5	95	2581.74	0.184815
HPDE	28.4119	0.520247	16	18	2664.43	0.170712
HPDE	26.6785	0.357778	21.5	25	2244.99	0.242262
HPDE	21.7926	0.270917	55.5	15.5	4235.26	0.142434
HPDE	22.4545	0.321952	36	25	1324.86	0.461632
HPDE	25.9036	0.38588	94	94.5	3862.67	0.117141
HPDE	28.0056	0.372977	572	463.5	5486.42	0.172214
HPDE	22.8479	0.62095	29	44	819.466	0.432318
HPDE	21.3797	0.388146	15.5	12	1002.61	0.376522
HPDE	34.5218	0.305497	18	15	3304.53	0.177548
HPDE	23.7228	0.280424	10	8.5	1368.82	0.345338
HPDE	26.1482	0.455489	5.5	6	855.531	0.354141
HPDE	22.3692	0.287088	11.5	8.5	348.895	0.621562
HPDE	20.3108	0.212926	12.5	7	987.918	0.495394
HPDE	32.5865	0.586559	323.5	326.5	3996.85	0.137631
HPDE	25.8544	0.336186	83.5	72	4430.07	0.131076
HPDE	22.5958	0.237709	19	14.5	1105.57	0.480539
HPDE	25.9036	0.329143	32.5	27	3334.36	0.178892
HPDE	26.2454	0.350145	59	52	5513.59	0.0331418
HPDE	21.7048	0.22606	26.5	16	4895.18	0.182543
HPDE	23.6152	0.284626	7	5	179.738	0.690771
HPDE	23.8299	0.274262	17	10.5	813.4	0.480291
HPDE	25.6567	0.29081	27.5	21	1638.48	0.343518
HPDE	24.1747	0.277128	75.5	62.5	3812.06	0.250244
HPDE	25.8051	0.62124	10	7.5	768.13	0.41021
HPDE	19.0826	0.256412	6.5	5.5	1765.84	0.315227
HPDE	23.8566	0.336289	98	94	5027.1	0.129999
HPDE	23.2073	0.307567	12.5	6.5	304.251	0.605889
HPDE	21.6461	0.235197	22.5	15	2268.59	0.348213
HPDE	23.9099	0.363988	32	35	3528.01	0.147349
HPDE	21.1703	0.27612	6.5	5	115.379	0.803307
HPDE	26.6785	0.366959	70	66	3984.8	0.148592
HPDE	23.2621	0.301904	22.5	16.5	1578.02	0.349889
HPDE	20.9283	0.234162	45	32.5	3473.24	0.308699
HPDE	20.6219	0.199025	11	4	9069.4	0.0732675
HPDE	19.1824	0.501409	8.5	11	69.0833	0.952081
HPDE	22.5676	0.110229	5.5	10.5	4142.16	0.0381096
HPDE	25.4073	0.359412	3	12.5	1320.58	0.247851
HPDE	12.8655	0.298107	40	34	1678.45	0.275404
HPDE	16.2345	0.530346	22	18	1562.73	0.260445
HPDE	22.1404	0.335441	16	12	227.175	0.734066
HPDE	25.9036	0.35752	16	11.5	1718.93	0.265358
HPDE	17.0382	0.362332	195.5	195.5	5678.04	0.142811
HPDE	20.248	0.20759	11	5	1935.62	0.326211
HPDE	14.0482	0.187827	3	6.5	1760.41	0.352928
HPDE	16.2737	0.353581	206.5	183.5	5699.69	0.102219
HPDE	25.5323	0.351531	91.5	84.5	4115.05	0.22152
HPDE	21.7926	0.304766	129	103.5	5648.77	0.163645
HPDE	20.6835	0.707496	22.5	14.5	425.983	0.455069
HPDE	24.1747	0.262162	30.5	32	1375.71	0.388056
HPDE	20.6219	0.180277	36.5	23	4466.98	0.210515
HPDE	12.5651	0.258411	69.5	59.5	4598.99	0.201424
HPDE	26.6785	0.19275	29.5	20	5959.7	0.145299
HPDE	21.11	0.275842	18.5	13	942.203	0.479893
HPDE	22.7921	0.289276	40.5	27	2529.24	0.275893
HPDE	15.3061	0.450033	107	81.5	2370	0.225691
HPDE	16.1559	0.462908	2.5	10	873.606	0.368254
HPDE	23.0698	0.277197	42.5	32.5	4543.41	0.153831
HPDE	18.1245	0.343783	63	55.5	3758.82	0.137484
HPDE	14.4062	0.269428	17	15.5	1643.44	0.410101
HPDE	25.5323	0.371611	49	50.5	1243.32	0.369759
HPDE	14.273	0.675858	75	68	1235.96	0.328861
HPDE	23.7764	0.377403	22	17	1192.37	0.37613
HPDE	24.201	0.32291	84.5	80	2922.44	0.295246
HPDE	28.4343	0.406496	223	211	4436.19	0.131249
HPDE	17.2977	0.38824	11	7	533.996	0.468845
HPDE	20.0585	0.151523	11.5	6	1074.49	0.459532
HPDE	22.7362	0.239263	26	16.5	3490.32	0.221756
HPDE	25.0287	0.367086	18	17	1556.81	0.327791
HPDE	25.7804	0.339091	9.5	10.5	1590.64	0.299849
HPDE	30.716	0.416034	16.5	20.5	1715.42	0.262238
HPDE	21.2603	0.259248	6	3.5	32.8981	0.984984
HPDE	22.1978	0.251937	13.5	9	2535.5	0.269172
HPDE	25.4073	0.310605	77.5	70	3768.85	0.222899
HPDE	22.9591	0.343078	11	8	222.253	0.655098
HPDE	22.3123	0.323668	78	61	2789.53	0.33939
HPDE	23.6691	0.421735	24	19	962.825	0.424998
HPDE	22.1978	0.400117	58	48	3090.51	0.204678
HPDE	24.6958	0.369449	159.5	157	4517.08	0.166658
HPDE	14.9271	0.3635	22	16	2269.51	0.236428
HPDE	20.745	0.632372	44	36.5	821.199	0.436955
HPDE	11.7806	0.433353	11.5	15	815.776	0.41887
HPDE	25.9527	0.425247	306	285	4857.71	0.103389
HPDE	25.607	0.541395	194.5	196	5085.53	0.183638
HPDE	21.1703	0.262304	17	12.5	1516.64	0.358892
HPDE	23.3441	0.379981	177.5	146.5	4025.33	0.184993
HPDE	26.0995	0.419432	83.5	89	1815.27	0.411003
HPDE	22.3977	0.231912	62.5	56	6506.99	0.106217
HPDE	14.4503	0.436394	8	6.5	338.556	0.517741
HPDE	14.3619	0.224574	14.5	10.5	561.384	0.717776
HPDE	20.9283	0.202546	27	18.5	2823.93	0.303164
HPDE	27.6626	0.397053	332	338	3787.71	0.214884
HPDE	22.6521	0.333514	45.5	31.5	3180.14	0.227146
HPDE	21.8218	0.365237	235	231.5	4216.97	0.252619
HPDE	28.1191	0.332371	58.5	58	3691.73	0.162362
HPDE	23.1249	0.295697	27.5	17.5	1792.77	0.335655
HPDE	19.9311	0.141117	14.5	9	1173.84	0.505724
HPDE	22.2551	0.294044	37.5	28.5	2246.2	0.343872
HPDE	24.306	0.296423	93.5	78	4340.39	0.170376
HPDE	22.6239	0.305557	8.5	5.5	355.994	0.56285
HPDE	23.0145	0.300424	38	26	1899.03	0.339979
HPDE	23.8032	0.307831	25.5	19.5	902.606	0.513132
HPDE	25.2313	0.374266	20	13.5	623.346	0.498558
HPDE	12.4634	0.450207	54	51	3112.65	0.149923
HPDE	20.498	0.193455	13.5	7	3905.49	0.207445
HPDE	24.0162	0.337662	16	9.5	1244.52	0.341532
HPDE	21.0799	0.206315	14.5	9	906.383	0.478937
HPDE	21.6166	0.283298	9	5.5	194.731	0.711031
HPDE	24.8243	0.369449	24.5	19.5	1543.73	0.341459
HPDE	21.7048	0.279067	34	18.5	1769.36	0.349881
HPDE	21.1402	0.234157	3.5	2.5	59.6329	0.822376
HPDE	21.3201	0.292395	7	4.5	73.1279	0.858863
HPDE	17.5535	0.429195	5.5	6	692.233	0.376058
HPDE	22.8758	0.398499	18.5	14	674.454	0.471866
HPDE	23.2895	0.331974	94.5	88	3409.52	0.227824
HPDE	20.5291	0.266463	12.5	13	1547.75	0.363311
HPDE	21.7048	0.313596	57	46	3525.73	0.181303
HPDE	24.4106	0.320031	16	15	1045.75	0.426473
HPDE	23.5612	0.356274	135.5	111	4901.35	0.136887
HPDE	24.2536	0.423619	65	62	3410.22	0.139247
HPDE	19.4461	0.227857	10	5	1088.66	0.407726
HPDE	19.674	0.417557	4.5	4.5	1125.83	0.283149
HPDE	20.7757	0.273109	23	17	1001.91	0.481912
HPDE	21.11	0.280214	14	10	501.013	0.557532
HPDE	25.9036	0.417732	78	67.5	2894.66	0.184535
HPDE	21.7634	0.34126	71.5	64.5	2098.07	0.411718
HPDE	19.3477	0.361855	6	3.5	74.7256	0.792524
HPDE	20.7757	0.318267	23	15	1299.68	0.44614
HPDE	19.3805	0.14779	17	8	4556.27	0.196688
HPDE	21.2902	0.357125	51.5	43.5	1991.35	0.375315
HPDE	22.0828	0.311069	6	4.5	235.769	0.613315
HPDE	20.8063	0.267135	9	5.5	331.86	0.607801
HPDE	22.6239	0.362062	293	286	5774.88	0.0849217
HPDE	25.0795	0.157383	12	6.5	3871.59	0.206501
HPDE	16.1953	0.372807	34.5	24.5	1183.24	0.434087
HPDE	12.7662	0.372126	6.5	6	464.56	0.494525
HPDE	13.2555	0.207409	6	2.5	1152.36	0.381449
HPDE	15.5126	0.404087	53	53	2762.53	0.220116
HPDE	14.8843	0.382974	40	38	3314.35	0.170057
HPDE	14.6255	0.301732	32	21.5	1282.86	0.432835
HPDE	14.5381	0.351849	9	4.5	176.956	0.662027
HPDE	21.9672	0.389876	69	68	3283.69	0.216251
HPDE	15.0545	0.288342	7.5	4	189.583	0.644232
HPDE	27.1984	0.436713	766	750	4604.47	0.109578
HPDE	13.159	0.287043	18	11	1184.22	0.409343
HPDE	14.4943	0.426437	71	50.5	3466.53	0.133969
HPDE	15.6759	0.372133	83	71.5	4542.48	0.101185
HPDE	16.3128	0.427513	148	101	3391.73	0.235526
HPDE	26.0017	0.244401	14	10.5	2046.72	0.158524
HPDE	27.6626	0.287642	13	10	2848.82	0.19103
HPDE	23.8833	0.287793	20.5	14.5	3300.12	0.196622
HPDE	22.9314	0.241057	48	36.5	3951.86	0.242681
HPDE	24.306	0.27592	26	15.5	6744.24	0.0552706
HPDE	23.2347	0.266682	93.5	80.5	5459.95	0.172738
HPDE	24.9012	0.368934	152	145	4959.33	0.13527
HPDE	21.9962	0.255646	10	7	401.058	0.62182
HPDE	23.0973	0.253616	55.5	47.5	3451.56	0.280174
HPDE	21.2303	0.195683	32	31	2142.37	0.493201
HPDE	29.8967	0.385033	1065	1038.5	5143.02	0.0586134
HPDE	22.1691	0.208742	7	5.5	2141.88	0.3046
HPDE	23.8032	0.286119	86	82	4855.43	0.203608
HPDE	20.2795	0.286194	8.5	5	197.152	0.688271
HPDE	21.7341	0.441089	20.5	18.5	1461.13	0.296665
HPDE	23.4529	0.156678	89	79	1150.9	0.521423
HPDE	23.8299	0.277786	87.5	83.5	5098.87	0.165277
HPDE	23.6152	0.310989	94.5	54	3599.68	0.0931846
HPDE	21.2902	0.224343	17	8	3238.49	0.212215
HPDE	19.0826	0.34843	2.5	2.5	29.2242	0.878463
HPDE	23.1524	0.256578	23	18	2707.33	0.282891
HPDE	25.0541	0.316121	11.5	14	1889.04	0.305024
HPDE	24.8756	0.246483	25	16.5	5907.92	0.0942041
HPDE	19.6416	0.456681	6.5	8	790.992	0.357482
HPDE	21.7048	0.203368	9	5	1472.22	0.366029
HPDE	26.6307	0.267497	11.5	7.5	523.851	0.527559
HPDE	21.0799	0.216199	29	23	4348.77	0.269967
HPDE	21.4095	0.195084	10.5	7	847.715	0.498124
HPDE	22.9314	0.242039	37.5	24.5	3405.4	0.235304
HPDE	22.1404	0.218894	5	3.5	2512.88	0.233397
HPDE	21.8218	0.174244	34	19	3485.11	0.305434
HPDE	21.7926	0.259895	6	3.5	242.611	0.625698
HPDE	22.6521	0.256583	27.5	20	785.314	0.541655
HPDE	16.2737	0.321626	3.5	3	159.143	0.627298
HPDE	16.1165	0.415568	34.5	33.5	1349.85	0.376059
HPDE	20.4358	0.260832	19	21	4108.14	0.183757
HPDE	23.8833	0.254151	11.5	11.5	3022.43	0.220696
HPDE	29.9393	0.682247	12	8	854.112	0.294709
HPDE	18.4033	0.357125	42.5	27.5	1423.88	0.253881
HPDE	20.56	0.345092	33	26.5	609.387	0.621441
HPDE	21.4985	0.260171	19	12.5	1268.13	0.442211
HPDE	16.888	0.227837	5.5	4	516.259	0.504691
HPDE	15.389	0.386088	67	64.5	3116.79	0.199705
HPDE	23.8833	0.309595	53.5	47.5	3649.59	0.207996
HPDE	21.8801	0.20958	62	54	7776.97	0.0854902
HPDE	22.7642	0.2786	19.5	17	3157.74	0.219343
HPDE	25.3823	0.409681	119	119	3373.03	0.172884
HPDE	23.7228	0.273033	110.5	115	6046.17	0.12444
HPDE	18.0893	0.265293	3.5	2.5	193.38	0.616944
HPDE	21.3201	0.194312	84.5	84	5088.38	0.289973
HPDE	15.1388	0.306445	18.5	18	2872.7	0.202068
HPDE	15.2644	0.289366	10.5	9.5	1491	0.355739
HPDE	15.389	0.513365	134	30.5	2028.24	0.189078
HPDE	20.1219	0.215405	20	13.5	2556.35	0.31581
HPDE	15.9577	0.429881	6.5	5	375.366	0.480241
HPDE	23.8032	0.271394	9	9	2080.07	0.262954
HPDE	17.0007	0.25533	5.5	3.5	129.997	0.730494
HPDE	14.4062	0.224385	8	5.5	286.538	0.659643
HPDE	16.6221	0.419685	485.5	498	3874.15	0.286557
HPDE	15.6759	0.233801	25	19	2491.4	0.312232
HPDE	14.8843	0.254438	10	6	1362.67	0.355821
HPDE	17.8412	0.20776	5.5	3.5	950.075	0.388417
HPDE	18.746	0.508599	6.5	5.5	254.885	0.549665
HPDE	22.7082	0.228317	16	12.5	2686.35	0.223996
HPDE	22.7921	0.308825	15.5	16	1445.28	0.367694
HPDE	20.7143	0.265293	26	20	3680	0.230794
HPDE	23.1249	0.286201	64	57.5	3519.37	0.247273
HPDE	22.6239	0.308473	44	35.5	3966.13	0.172331
HPDE	22.6239	0.250133	178	180.5	6911.94	0.10008
HPDE	21.1703	0.178856	21.5	14	4286.52	0.223162
HPDE	25.1049	0.337033	53.5	62.5	3614.55	0.210077
HPDE	24.9522	0.311653	52.5	53	1964.36	0.306662
HPDE	19.7386	0.61503	451	2.5	396.789	0.352372
HPDE	25.607	0.273588	9	6	1924.26	0.275686
HPDE	21.7926	0.289775	6.5	3.5	457.358	0.503591
HPDE	19.3805	0.35827	24.5	23	2954.83	0.162837
HPDE	21.1703	0.237602	4.5	3	679.601	0.437726
HPDE	24.7987	0.296439	10.5	9	1127.42	0.39516
HPDE	22.9868	0.327495	12.5	9	1995.58	0.237682
HPDE	19.5766	0.205193	18	8.5	563.746	0.615243
HPDE	20.2166	0.339589	3	2	204.881	0.567294
HPDE	20.8979	0.247568	7	3	335.211	0.545243
HPDE	23.4529	0.413044	12.5	10.5	1200.85	0.330014
HPDE	12.4634	0.345485	22.5	13.5	3118.61	0.194904
HPDE	12.5651	0.218449	7.5	4.5	636.924	0.480785
HPDE	23.8299	0.360858	15	13	2200.19	0.22691
HPDE	22.9591	0.323678	105	97.5	3865.82	0.187179
HPDE	33.8137	0.351176	39.5	35.5	2994.94	0.134926
HPDE	14.7123	0.40613	149.5	151.5	3580.71	0.203905
HPDE	13.3034	0.362703	37.5	32	2066.19	0.29943
HPDE	20.591	0.370015	56	50.5	3882.15	0.096656
HPDE	17.0755	0.354135	58	9	5194.15	0.0381038
HPDE	16.1953	0.35857	38.5	29	4934.32	0.075034
HPDE	14.273	0.189874	11.5	8	5842	0.135978
HPDE	21.0194	0.247223	13	10.5	2347.1	0.29729
HPDE	18.746	0.365513	205	202.5	4547.02	0.113532
HPDE	13.0131	0.446319	26.5	29.5	1891.77	0.247477
HPDE	13.7736	0.416192	83.5	78	3111.8	0.163956
HPDE	20.9891	0.226666	35.5	29	3794.73	0.266087
HPDE	23.1524	0.284864	82	78.5	4985.72	0.127547
HPDE	20.0585	0.215938	28.5	12	2332.63	0.334323
HPDE	23.6152	0.308089	55	51	4352.09	0.169325
HPDE	22.8201	0.324363	89	74	4879.71	0.150934
HPDE	22.4261	0.328106	54.5	51.5	4985.81	0.102087
HPDE	14.4943	0.373128	40.5	38.5	3342.87	0.143511
HPDE	25.0795	0.346857	56.5	49	4481.46	0.0895333
HPDE	21.1402	0.171182	45	37.5	3751.86	0.270785
HPDE	21.7048	0.302362	51.5	44	2656.72	0.249221
HPDE	22.7921	0.279107	186.5	177	6237.56	0.141615
HPDE	28.2546	0.424799	772	772	5143.34	0.0772822
HPDE	20.1851	0.270917	27.5	27.5	3159	0.259916
HPDE	20.7143	0.20759	19.5	11.5	413.239	0.695453
HPDE	29.0982	0.253275	20	17	6457.66	0.0429005
HPDE	12.6157	0.393884	15.5	16	2125.39	0.146278
HPDE	21.5281	0.233245	10	8	2134.82	0.280243
HPDE	19.8672	0.138637	4.5	2.5	5131.94	0.157205
HPDE	14.7555	0.244748	8	7	1409.75	0.348775
HPDE	20.3734	0.450175	7.5	7	793.984	0.349548
HPDE	22.6801	0.376237	33	24.5	2484.01	0.247431
HPDE	11.9416	0.398982	31	27.5	3508.29	0.134879
HPDE	25.6318	0.35131	54.5	48	4015.59	0.106451
HPDE	23.6152	0.268411	10	7	4795.85	0.10219
HPDE	27.9829	0.385859	8.5	13.5	3422	0.116316
HPDE	23.5612	0.351951	48	45.5	4029.02	0.147982
HPDE	20.3421	0.219186	20	11	988.25	0.525729
HPDE	19.116	0.217611	5	5	120.981	0.821411
HPDE	27.4315	0.451573	128.5	128	4063.66	0.117542
HPDE	20.4669	0.268887	21.5	12.5	2153.5	0.305253
HPDE	20.498	0.239993	18	11.5	1394.05	0.391494
HPDE	19.674	0.167501	18.5	13.5	2180.33	0.363373
HPDE	17.3345	0.225044	4	2	38.2337	0.906077
HPDE	12.9149	0.311757	14.5	11	949.662	0.409675
HPDE	25.4324	0.413902	22.5	25	2518.7	0.199085
HPDE	22.054	0.289936	32	27	2888.33	0.241948
HPDE	19.2487	0.344561	55.5	54.5	3872.12	0.177289
HPDE	22.7921	0.354562	102	96.5	5093.1	0.0797209
HPDE	21.7048	0.287321	104.5	94	8638.2	0.0381828
HPDE	23.3441	0.392967	20.5	17	2416.36	0.19323
HPDE	21.1402	0.338969	79.5	72.5	4556.52	0.0908619
HPDE	22.0251	0.336494	82	80	3251.74	0.27089
HPDE	24.8756	0.422404	103.5	111	3285.24	0.147215
HPDE	15.0121	0.0753179	16.5	12	1171.02	0.2957
HPDE	19.7708	0.193262	47.5	50	3730.69	0.0711204
HPDE	26.3423	0.364956	37	31.5	2776.72	0.179094
HPDE	22.1116	0.38588	13.5	13.5	899.591	0.411619
HPDE	26.4869	0.398605	17	18	893.867	0.348583
HPDE	25.2061	0.361499	635	641	5535.12	0.148514
HPDE	22.4261	0.423828	73	72.5	3371.09	0.119678
HPDE	23.5883	0.297215	113	107	6388.24	0.0861024
HPDE	24.306	0.326474	119.5	121.5	3601.72	0.2
HPDE	24.122	0.377441	10	8	495.634	0.514515
HPDE	19.8672	0.184763	28.5	19.5	3179.96	0.307442
HPDE	25.731	0.374121	40	40	3274	0.170892
HPDE	21.7926	0.254428	28.5	18	1884.19	0.360043
HPDE	31.3316	0.385924	160	140.5	4810.58	0.10295
HPDE	23.5342	0.237301	37.5	26.5	3024.88	0.310619
HPDE	25.9282	0.37244	295	216.5	5288.22	0.0548335
HPDE	20.0267	0.166797	20.5	14	4540.39	0.227351
HPDE	25.3069	0.579675	30	29.5	4032.36	0.052889
HPDE	26.8687	0.380432	26	28	5250.11	0.0254789
HPDE	16.4294	0.367099	201.5	210.5	5647.05	0.118133
HPDE	22.5394	0.252192	6	4.5	1060.5	0.371412
HPDE	22.7362	0.309161	22.5	17	2832.8	0.231174
HPDE	22.054	0.242412	7	4.5	2290.89	0.238981
HPDE	18.5755	0.424313	2.5	2.5	377.123	0.440884
HPDE	23.1524	0.344481	8	4.5	374.09	0.520405
HPDE	28.5683	0.42772	7	5.5	401.742	0.437464
HPDE	23.8032	0.235162	14.5	10.5	1676.41	0.376562
HPDE	22.1116	0.175522	22.5	15.5	3014.78	0.305346
HPDE	24.5666	0.254137	33	28.5	2530.59	0.334324
HPDE	31.1277	0.361864	4.5	5.5	3746.79	0.0727572
HPDE	22.5394	0.213141	7.5	5	1565.56	0.350969
HPDE	22.7362	0.194405	16.5	12	4956.84	0.191566
HPDE	24.4366	0.408619	6.5	4	251.669	0.544128
HPDE	21.9092	0.219046	13.5	8	372.395	0.683373
HPDE	21.9672	0.208742	10	6	2161.64	0.308098
HPDE	22.1691	0.237602	15.5	8.5	952.467	0.483389
HPDE	25.7557	0.347449	14.5	17.5	2524.06	0.241221
HPDE	23.1524	0.240824	8	4.5	86.3136	0.857977
HPDE	26.916	0.342328	9	21	2513.28	0.220278
HPDE	24.0162	0.237912	141.5	129	5667.05	0.210894
HPDE	21.6461	0.195084	9.5	6.5	652.108	0.53907
[truncated: 6,694 more rows]

## Sheet: HEYA8
Cell Line	Diameter	Strain	Transit Time	Entry Time	Elastic Modulus	Beta
	um	-	ms	ms	Pa	-
Mock	24.85	0.138063	267.5	201.25	1105.26	0.741652
Mock	22.8201	0.096634	37.5	25	2438.66	0.188687
Mock	32.2922	0.463253	472.5	298.75	3570.32	0.188992
Mock	8.51908	0.661296	680	712.5	3657.22	0.137176
Mock	27.0576	0.178779	128.75	138.75	4009.25	0.0543184
Mock	28.0056	0.114669	11.25	17.5	2503.08	0.197733
Mock	35.7716	0.538395	31.25	33.75	2257.41	0.170879
Mock	24.6442	0.483063	22.5	16.25	398.06	0.58332
Mock	27.7085	0.625341	15	31.25	972.868	0.412927
Mock	30.1512	0.583507	71.25	77.5	2078.51	0.352681
Mock	41.8718	0.443169	51.25	53.75	3478.51	0.0960713
Mock	19.9631	0.439923	36.25	30	1375.08	0.340765
Mock	19.2818	0.284717	63.75	47.5	2277.09	0.274394
Mock	28.5237	0.500559	63.75	8.75	349.453	0.491434
Mock	9.09728	0.352641	195	6.25	2507.12	0.232583
Mock	26.4147	0.419829	7.5	6.25	110.024	0.756832
Mock	22.1978	0.362382	43.75	35	3497.05	0.194258
Mock	36.9102	0.43844	46.25	33.75	2279.36	0.230693
Mock	17.2609	0.598252	618.75	16.25	1338.21	0.254506
Mock	14.273	0.55732	847.5	273.75	4125.89	0.119365
Mock	24.2273	0.307673	63.75	6.25	65.4394	0.930975
Mock	28.9886	0.652129	358.75	32.5	1966.23	0.199007
Mock	40.3228	0.522045	232.5	245	2436.64	0.347191
Mock	28.7903	0.576709	370	388.75	3792.62	0.0445355
Mock	25.9772	0.107195	31.25	7.5	5647.77	0.0562775
Mock	23.8566	0.34968	307.5	276.25	4645.64	0.155358
Mock	8.21472	0.497141	746.25	27.5	1607.52	0.30569
Mock	30.4662	0.314886	182.5	122.5	1307.48	0.639899
Mock	22.5676	0.491468	11.25	7.5	361.531	0.494322
Mock	45.3041	0.713969	2817.5	42.5	3641.77	0.035351
Mock	23.2073	0.240129	23.75	13.75	1913.09	0.345064
Mock	7.97885	0.360533	36.25	33.75	1837.26	0.298371
Mock	32.2922	0.648835	58.75	71.25	2022.88	0.260677
Mock	28.0511	0.490654	50	31.25	1928.94	0.234194
Mock	34.095	0.590197	51.25	27.5	3635.95	0.0586104
Mock	36.8412	0.349914	185	147.5	3623.78	0.150386
Mock	25.2061	0.428232	21.25	7.5	326.397	0.5582
Mock	17.187	0.475623	1493.75	15	1686.45	0.171373
Mock	27.2919	0.482762	81.25	55	3849.91	0.142517
Mock	8.05824	0.337153	83.75	75	3101.23	0.30806
Mock	24.6442	0.474305	15	13.75	541.52	0.485692
Mock	22.4261	0.34792	458.75	212.5	5291.88	0.120898
Mock	9.4407	0.0656214	168.75	168.75	4310.14	0.0411733
Mock	18.2295	0.345775	32.5	28.75	1042.91	0.526033
Mock	23.1249	0.491361	1270	27.5	1800.41	0.251294
Mock	26.1969	0.408651	8.75	8.75	308.15	0.590868
Mock	37.0823	0.54389	131.25	120	5455.41	0.038851
Mock	28.6573	0.383894	347.5	22.5	2342.9	0.194918
Mock	39.8623	0.346339	8.75	6.25	303.12	0.556713
Mock	31.3113	0.412415	7.5	6.25	130.02	0.719222
Mock	37.4921	0.325128	5	11.25	1246.5	0.294148
Mock	32.3512	0.484785	1182.5	165	1794.54	0.507949
Mock	22.2265	0.269534	1333.75	832.5	3462.14	0.583694
Mock	23.2895	0.540368	245	183.75	3211.62	0.172936
Mock	30.3196	0.610299	433.75	436.25	3515.38	0.116971
Mock	27.5934	0.336354	3.75	18.75	1419.07	0.363159
Mock	24.4887	0.401019	16.25	13.75	1122.28	0.367587
508-3p	25.8298	0.616378	992.5	1007.5	3508.56	0.173734
508-3p	26.8924	0.247017	148.75	120	2709.9	0.225694
508-3p	23.0973	0.58693	12.5	8.75	310.953	0.520061
508-3p	37.7459	0.605007	530	330	4118.44	0.0238458
508-3p	26.845	0.459035	3.75	15	740.953	0.415985
508-3p	23.0422	0.53799	12.5	13.75	179.234	0.719665
508-3p	36.1962	0.705154	177.5	167.5	2085.55	0.193664
508-3p	29.3379	0.464406	35	33.75	2050.21	0.207308
508-3p	30.9637	0.569634	156.25	162.5	3184.42	0.0675887
508-3p	34.0763	0.427589	1441.25	10	280.806	0.531487
508-3p	28.5013	0.661806	28.75	35	1224.31	0.387979
508-3p	37.7796	0.721764	380	406.25	3848.67	0.00430728
508-3p	28.0056	0.491828	23.75	27.5	1248.83	0.302114
508-3p	31.0048	0.598112	7.5	10	371.432	0.504975
508-3p	46.62	0.465012	47.5	43.75	2925.78	0.12576
508-3p	31.6952	0.454306	17.5	16.25	2595.81	0.14278
508-3p	33.9453	0.546642	108.75	112.5	2274.66	0.208741
508-3p	36.6853	0.639363	577.5	380	2618.53	0.380075
508-3p	34.5955	0.698504	871.25	606.25	4791.4	0.0832048
508-3p	26.916	0.608967	128.75	20	353.176	0.576446
508-3p	29.8541	0.4804	197.5	173.75	3523.26	0.182943
508-3p	24.0692	0.558216	8.75	8.75	1367.03	0.23124
508-3p	12.7662	0.49385	387.5	30	2773.83	0.135059
508-3p	20.1219	0.471093	170	147.5	3586.65	0.125895
508-3p	11.1704	0.220767	982.5	25	2040.93	0.175186
508-3p	34.6873	0.59869	98.75	93.75	2082.4	0.321545
508-3p	50.4248	0.620497	511.25	491.25	4684.14	0.0682747
508-3p	8.13686	0.565003	630	117.5	2401.68	0.249771
508-3p	31.2298	0.630269	278.75	306.25	3878.77	0.0396346
508-3p	33.3397	0.475158	11.25	20	2016.94	0.185732
508-3p	11.8345	0.523663	5	12.5	1715.15	0.223737
508-3p	47.5127	0.414923	115	37.5	2304.13	0.196913
508-3p	56.6442	0.726018	415	276.25	2783.87	0.126338
508-3p	27.5934	0.465312	113.75	128.75	4310.67	0.00263104
508-3p	37.8302	0.681089	117.5	23.75	1146.08	0.334957
508-3p	45.3041	0.526894	162.5	75	2051.05	0.279289
508-3p	25.3069	0.526647	58.75	80	976.477	0.523809
508-3p	27.2452	0.304195	81.25	93.75	5188.71	0.0358103
508-3p	33.416	0.509056	221.25	66.25	3943.36	0.0451743
508-3p	9.167	0.386913	296.25	5	1722.86	0.160697
508-3p	20.8369	0.538352	230	30	1821.94	0.245648
508-3p	8.29186	0.560705	675	208.75	3398.24	0.0668646
508-3p	27.2685	0.471276	17.5	12.5	2620.76	0.160187
508-3p	28.3221	0.528089	118.75	120	2810.71	0.199205
508-3p	23.3168	0.356486	13.75	11.25	1154.2	0.350317
508-3p	28.5683	0.598053	50	78.75	2275.27	0.197314
508-3p	22.2837	0.452483	6.25	7.5	250.506	0.587169
508-3p	27.9374	0.409106	40	52.5	1243.19	0.426591
508-3p	36.1434	0.489934	1022.5	27.5	3876.65	0.0634926
508-3p	28.3894	0.191482	198.75	172.5	4298.07	0.0743319
508-3p	31.3316	0.670604	50	50	1538.83	0.277907
508-3p	29.2727	0.561627	93.75	55	3936.41	0.107424
508-3p	8.13686	0.665191	1428.75	247.5	3732.19	0.125667
508-3p	30.1512	0.566448	50	12.5	487.796	0.491746
508-5p	13.5875	0.492824	61.25	40	1161.45	0.425765
508-5p	29.7259	0.182385	57.5	55	3124.22	0.108927
508-5p	26.8213	0.101639	6.25	8.75	4881.94	0.0745772
508-5p	15.0121	0.488327	2021.25	35	700.186	0.563664
508-5p	30.5497	0.593316	250	185	1776.82	0.406451
508-5p	20.8063	0.460076	116.25	106.25	1808.31	0.409704
508-5p	34.8339	0.636616	55	50	1140.72	0.357796
508-5p	10.0925	0.539942	7.5	12.5	1865.37	0.184561
508-5p	40.8872	0.59694	118.75	20	1297.55	0.242567
508-5p	27.8689	0.386123	22.5	21.25	1819.67	0.276399
508-5p	24.8756	0.490654	7.5	8.75	837.355	0.33579
508-5p	23.7764	0.414407	3.75	5	498.849	0.436777
508-5p	28.2095	0.227206	118.75	118.75	3004.83	0.15126
508-5p	21.7341	0.600303	95	76.25	2616.89	0.165471
508-5p	26.0262	0.45166	7.5	6.25	822.859	0.343147
508-5p	8.05824	0.432049	53.75	45	2079.65	0.245659
508-5p	23.7764	0.488489	8.75	18.75	889.751	0.404274
508-5p	29.8114	0.52804	16.25	7.5	569.897	0.40661
508-5p	23.9099	0.518992	21.25	20	2202.28	0.153901
508-5p	24.6442	0.528775	11.25	8.75	998.869	0.287955
508-5p	12.7162	0.636509	441.25	20	659.792	0.399677
508-5p	41.0426	0.480873	353.75	125	2449.06	0.179088
508-5p	38.2652	0.706298	7.5	15	439.004	0.458692
508-5p	8.21472	0.611539	687.5	21.25	1034.44	0.335349
508-5p	11.8882	0.442733	31.25	20	681.831	0.50277
508-5p	9.96557	0.263766	745	31.25	5934.74	0.0770849
508-5p	45.7516	0.657369	175	133.75	2575.93	0.213275
508-5p	20.7143	0.625169	367.5	47.5	2188.57	0.16048
508-5p	29.3595	0.528089	5	16.25	1103.75	0.321599
508-5p	26.9397	0.414812	15	22.5	1889.19	0.2399
508-5p	8.81292	0.428787	242.5	18.75	691.894	0.448964
509-3p	56.6779	0.628539	8.75	8.75	429.167	0.479238
509-3p	23.5612	0.619581	16.25	41.25	3494.73	0.100822
509-3p	78.331	0.205658	10	17.5	8344.08	0.0301228
509-3p	20.7757	0.335804	3.75	20	1787.86	0.294299
509-3p	28.6573	0.699938	162.5	28.75	2931.78	0.0289833
509-3p	31.1482	0.323749	183.75	210	4158.5	0.0146869
509-3p	31.433	0.18896	11.25	7.5	7736.2	0.0206254
509-3p	44.0646	0.343262	12.5	21.25	3053.87	0.149138
509-3p	40.3386	0.695922	53.75	30	1418.09	0.226126
509-3p	53.1896	0.371471	6.25	12.5	3199.13	0.0720267
509-3p	34.3739	0.224892	28.75	48.75	3691.24	0.0429417
509-3p	25.9527	0.657235	38.75	20	3573.19	0.0572926
509-3p	18.7121	0.202364	500	90	3319.99	0.111022
509-3p	8.05824	0.372382	921.25	137.5	3278.41	0.0440344
509-3p	31.8555	0.57233	227.5	250	3387.95	0.126149
509-3p	28.5013	0.460552	205	21.25	2114.72	0.222371
509-3p	8.21472	0.729496	831.25	5	135.55	0.570408
509-3p	22.4828	0.534357	28.75	10	477.866	0.443379
509-3p	31.1482	0.511912	198.75	30	3497.66	0.030181
509-3p	29.9818	0.615861	6.25	17.5	1393.88	0.197484
509-3p	28.7017	0.563531	15	18.75	2224.34	0.135558
509-3p	28.0964	0.446066	3.75	8.75	1051.52	0.310271
509-3p	31.8555	0.45264	6.25	5	669.767	0.373578
509-3p	21.0799	0.575533	7.5	32.5	4094.74	0.129143
509-3p	31.4937	0.489124	230	262.5	4105.98	0.111503
509-3p	29.1637	0.679054	7.5	8.75	580.411	0.355578
509-3p	32.1934	0.581748	16.25	6.25	724.314	0.303805
509-3p	25.7557	0.383818	196.25	8.75	1177.05	0.256639
509-3p	33.7195	0.509726	107.5	100	4413.04	0.00108876
509-3p	25.2565	0.479092	916.25	8.75	5487.46	0.0716214
509-3p	36.3891	0.526074	257.5	25	3020.84	0.0347187
509-3p	38.3483	0.747965	157.5	11.25	664.958	0.316291
509-3p	41.1201	0.791038	791.25	327.5	3325.65	0.173652
509-3p	10.94	0.416967	58.75	75	2100.24	0.295242
509-3p	25.3572	0.643097	37.5	31.25	3420.84	0.0842729
509-3p	19.5441	0.638447	18.75	27.5	4614.59	0.0528577
509-3p	8.81292	0.503281	158.75	10	1007.76	0.304193
509-3p	11.2272	0.356721	512.5	10	1470.71	0.305519
509-3p	40.4646	0.585191	322.5	50	3742.21	0.0145993
509-3p	33.6249	0.265153	231.25	81.25	3459.66	0.0929589
509-3p	30.4453	0.521195	7.5	5	421.138	0.422587
509-3p	39.7984	0.157569	80	83.75	2510.88	0.260058
509-3p	32.9363	0.745014	1063.75	75	969.657	0.388424
509-5p	8.81292	0.593932	992.5	593.75	4103.35	0.073149
509-5p	25.1302	0.61667	423.75	272.5	4823.8	0.176423
509-5p	8.59348	0.384509	165	45	2257.92	0.288368
509-5p	26.0751	0.497439	25	22.5	1532.84	0.280522
509-5p	20.0585	0.426707	42.5	65	2319.46	0.235287
509-5p	16.4682	0.631602	117.5	86.25	3790.87	0.154574
509-5p	24.2798	0.473146	342.5	177.5	2763.97	0.190101
509-5p	17.7697	0.512194	60	61.25	3035.11	0.186809
509-5p	20.9587	0.320898	40	37.5	7780.64	0.00629374
509-5p	19.0826	0.48251	28.75	21.25	1158.46	0.377624
509-5p	19.5115	0.437814	87.5	76.25	2659.63	0.210143
509-5p	21.0194	0.57924	35	21.25	439.797	0.58609
509-5p	20.7143	0.377203	77.5	71.25	657.618	0.740411
509-5p	21.4392	0.566883	35	35	1342.47	0.295559
509-5p	24.0692	0.584083	251.25	168.75	2203.47	0.398834
509-5p	25.3572	0.435797	150	158.75	3546.79	0.184083
509-5p	24.7473	0.734853	32.5	13.75	328.585	0.537174
509-5p	16.2345	0.0684806	157.5	86.25	5185.73	0.0269094
509-5p	19.2156	0.219059	146.25	120	4690.21	0.0625188
509-5p	34.7057	0.603357	388.75	73.75	2007.39	0.265418
509-5p	19.4788	0.457689	172.5	56.25	2664.77	0.170209
509-5p	12.666	0.610724	118.75	92.5	2205.84	0.259304
509-5p	30.3825	0.593304	52.5	18.75	3854.44	0.0491476
509-5p	23.2347	0.317658	1030	106.25	5006.33	0.13101
509-5p	22.7642	0.333799	355	187.5	4263.76	0.00689761
509-5p	21.9962	0.422475	353.75	102.5	3413.68	0.138091
509-5p	19.9631	0.314364	207.5	31.25	3454.95	0.187565
509-5p	16.6985	0.354318	26.25	22.5	2823.76	0.18526
509-5p	13.3988	0.407622	71.25	16.25	3569.9	0.0694739
509-5p	18.1245	0.451825	60	41.25	3898.71	0.0711806
509-5p	18.0893	0.394352	10	8.75	1244.66	0.276962
509-5p	17.6619	0.656167	742.5	311.25	4236.91	0.127304
509-5p	25.6318	0.386004	133.75	35	2112.28	0.311442
509-5p	27.2218	0.671638	68.75	51.25	2251.41	0.198769
509-5p	25.5074	0.564761	118.75	63.75	2800.04	0.132116
509-5p	23.3168	0.407533	71.25	36.25	2145.25	0.30319
509-5p	24.2273	0.364956	1163.75	336.25	4889.32	0.0620992
509-5p	21.7926	0.706699	266.25	100	3338.9	0.145011
509-5p	18.9151	0.359811	20	16.25	2078.04	0.269434
509-5p	28.9446	0.611646	62.5	61.25	2106.81	0.245051
509-5p	21.5281	0.584294	36.25	37.5	1633.2	0.304598
509-5p	22.3123	0.447075	60	40	1653.4	0.27559
509-5p	23.8833	0.576095	60	56.25	2045.94	0.24737
509-5p	25.8298	0.54529	25	16.25	2012.32	0.170488
509-5p	44.2376	0.0671302	293.75	115	5615.09	0.0105724
509-5p	29.0982	0.364011	115	105	4971.02	0.0847472
509-5p	13.4462	0.269923	21.25	13.75	1664.53	0.314749
509-5p	18.9151	0.612794	110	77.5	1885.1	0.327918
509-5p	17.187	0.487203	53.75	57.5	2390.02	0.224303
509-5p	23.7496	0.429259	10	12.5	79.3948	0.936605
509-5p	16.8503	0.430912	37.5	46.25	1687.06	0.315026
509-5p	20.2795	0.501085	96.25	100	4609.98	0.136693
509-5p	18.8476	0.419106	43.75	40	5502.64	0.0858132
509-5p	12.3092	0.62666	220	196.25	2815.16	0.198494
509-5p	18.5068	0.517081	17.5	23.75	1385.88	0.289542
509-5p	16.888	0.376906	7.5	8.75	1549.41	0.25627
509-5p	39.2832	0.13675	127.5	10	2117.86	0.207705
509-5p	8.51908	0.650478	37.5	35	2055.03	0.264656
509-5p	26.6068	0.581167	1358.75	465	3655.41	0.118816
509-5p	8.05824	0.649785	235	156.25	3331.94	0.153083
509-5p	20.2166	0.477127	17.5	17.5	370.198	0.592832
509-5p	35.3058	0.474576	23.75	28.75	2009.26	0.212699
509-5p	26.6546	0.622822	68.75	72.5	1596.31	0.3228
509-5p	30.5289	0.590453	113.75	65	1587.32	0.301111
509-5p	17.8412	0.462559	26.25	23.75	2142.77	0.197406
509-5p	22.9868	0.566703	251.25	237.5	5101.71	0.0722041
509-5p	18.1946	0.339219	12.5	8.75	668.435	0.456908
509-5p	25.9036	0.486863	383.75	383.75	3965.55	0.200725
509-5p	28.0964	0.123862	811.25	15	2643.14	0.179944
509-5p	27.2685	0.524218	77.5	72.5	1218.88	0.470517
509-5p	23.8833	0.606589	93.75	81.25	2178.98	0.184152
509-5p	30.4453	0.45389	537.5	407.5	5448.21	0.0129728
509-5p	24.0956	0.063635	16.25	27.5	6935.37	0.0173016
509-5p	30.6745	0.371194	11.25	17.5	2197.61	0.203792
509-5p	24.4887	0.392766	501.25	40	2666.07	0.19296
509-5p	19.5441	0.127313	211.25	212.5	4454.51	0.0275764
509-5p	12.8655	0.353394	187.5	88.75	2157.47	0.22995
509-5p	24.1484	0.485681	558.75	202.5	4856.11	0.00632296
509-5p	11.1132	0.447524	37.5	25	2209.7	0.198191
509-5p	19.9949	0.442111	15	20	1822.56	0.262954
509-5p	15.6353	0.5367	428.75	360	3816.8	0.146218
509-5p	28.367	0.480903	798.75	675	4097.74	0.130642
509-5p	35.6468	0.728991	613.75	392.5	3855.81	0.0756338
509-5p	30.003	0.515926	11.25	15	1117.42	0.298809
130b	21.5872	0.356464	25	20	3662.19	0.176006
130b	26.4388	0.478414	120	63.75	1399.87	0.365289
130b	28.6795	0.485965	7.5	15	2034.99	0.154548
130b	27.175	0.531041	65	61.25	2197.24	0.199344
130b	17.8412	0.492196	35	16.25	1097.07	0.320368
130b	9.4407	0.415099	66.25	48.75	6106.5	0.0405402
130b	32.3512	0.410068	797.5	377.5	2807.33	0.102814
130b	28.0737	0.535863	41.25	22.5	1128.41	0.31352
130b	29.0325	0.499862	5	11.25	889.255	0.333401
130b	24.5925	0.499747	11.25	45	1845.88	0.229368
130b	37.8302	0.519207	56.25	32.5	1572.03	0.306395
130b	10.94	0.341019	276.25	193.75	6322.23	0.0975446
130b	39.3964	0.692867	118.75	128.75	2788.31	0.0708943
130b	42.1295	0.528797	56.25	8.75	827.134	0.358596
130b	38.7939	0.460627	43.75	21.25	2593.39	0.128245
130b	28.6795	0.630888	91.25	45	2280.96	0.150098
130b	22.3123	0.534946	173.75	92.5	4319.82	0.0119455
130b	33.8702	0.543139	188.75	82.5	3204.85	0.0454149
130b	30.5497	0.642061	123.75	70	2504.5	0.157155
130b	11.2838	0.252547	262.5	243.75	5407.6	0.0745256
130b	11.1704	0.505957	12.5	7.5	475.314	0.421768
130b	24.306	0.265734	251.25	8.75	3412.09	0.128305
130b	20.7757	0.31769	102.5	135	2157.65	0.262963
130b	31.189	0.709267	66.25	10	1112.38	0.206814
130b	28.8124	0.307961	150	55	4769.02	0.0734772
130b	34.9615	0.330573	2025	25	1548.92	0.25033
130b	30.6122	0.70766	275	122.5	1697.52	0.271892
130b	22.1404	0.42355	37.5	32.5	1079.43	0.430219
130b	24.3584	0.412796	7.5	8.75	3541.36	0.103659
130b	20.6835	0.48753	187.5	21.25	1763.18	0.175125
130b	35.5215	0.697673	512.5	40	3033.85	0.0403344
130b	27.7315	0.521577	31.25	20	502.759	0.536615
130b	36.3541	0.548078	78.75	65	2830.7	0.0989387
130b	23.3986	0.453535	28.75	26.25	2029.4	0.217204
130b	29.1637	0.65318	146.25	145	3469.72	0.0331844
130b	28.9446	0.503719	41.25	31.25	3405.96	0.0481043
130b	24.8243	0.572476	85	13.75	1655.92	0.178579
130b	15.2644	0.48693	252.5	235	3441.36	0.179507
130b	39.2994	0.283333	17.5	15	4718.06	0.0395856
130b	33.889	0.263936	71.25	46.25	5717.66	0.0386267
130b	24.7987	0.381668	63.75	37.5	3846.18	0.157427
130b	34.3369	0.740842	330	322.5	4118.7	0.0454036
130b	22.0251	0.409089	13.75	7.5	2479.11	0.154455
130b	12.0478	0.611364	95	11.25	693.213	0.363542
130b	35.1069	0.753929	67.5	97.5	2374.38	0.137127
130b	37.1509	0.758892	8.75	11.25	524.989	0.416825
SCR	23.8833	0.555822	266.25	266.25	3209.73	0.169106
SCR	18.4379	0.490893	272.5	222.5	2615.02	0.367967
SCR	22.5958	0.674548	156.25	136.25	2346.1	0.256005
SCR	20.9283	0.509428	18.75	15	313.757	0.605555
SCR	22.1116	0.239919	8.75	33.75	1185.83	0.654803
SCR	28.2771	0.358531	815	333.75	3708.33	0.0833895
SCR	34.2626	0.240983	5	23.75	2363.63	0.169471
SCR	23.2073	0.208505	703.75	278.75	3212.63	0.192706
SCR	24.7473	0.455839	101.25	100	5263.63	0.0755431
SCR	19.674	0.537654	52.5	46.25	1594.01	0.288308
SCR	33.7195	0.648464	55	25	1374.29	0.282144
SCR	29.3379	0.577172	118.75	93.75	2260.08	0.228206
SCR	18.7121	0.487498	13.75	7.5	206.678	0.618898
SCR	24.122	0.587117	157.5	172.5	1246.7	0.630484
SCR	24.2536	0.542402	33.75	21.25	2299.57	0.163335
SCR	17.7697	0.643709	30	22.5	1817.82	0.307299
SCR	9.09728	0.763236	1260	121.25	1354.73	0.42222
SCR	19.7386	0.630346	313.75	303.75	4145.85	0.0305731
SCR	19.803	0.118625	1033.75	551.25	5376.22	0.0186105
SCR	27.7315	0.63871	3321.25	53.75	5360.55	0.0556529
SCR	25.731	0.148551	156.25	120	4065.63	0.0522702
SCR	20.1535	0.328848	47.5	32.5	3991.54	0.187396
SCR	20.1535	0.407632	45	36.25	536.157	0.696558
SCR	18.678	0.582108	8.75	25	272.352	0.689897
SCR	9.02703	0.157751	77.5	35	4534.54	0.106646
SCR	21.8218	0.550817	70	41.25	1691.48	0.270786
SCR	24.0162	0.474482	72.5	48.75	2319.59	0.237103
SCR	20.248	0.442891	45	32.5	1522.49	0.282537
SCR	25.2565	0.543989	17.5	12.5	1086.06	0.27225
SCR	25.2313	0.53537	165	125	2703.17	0.195064
SCR	26.2697	0.59075	225	156.25	2298.51	0.224951
SCR	23.1524	0.632756	16.25	12.5	137.477	0.788099
SCR	27.8232	0.107726	65	58.75	3216.7	0.118997
SCR	28.6573	0.650098	396.25	418.75	3018.56	0.18152
SCR	27.7085	0.554466	33.75	36.25	1730.95	0.248741
SCR	32.015	0.339855	172.5	27.5	2224.44	0.351759
SCR	22.0251	0.57296	42.5	13.75	448.09	0.478872
SCR	24.7987	0.531688	5	15	453.213	0.528506
SCR	8.81292	0.205647	185	52.5	5909.58	0.0931859
SCR	29.5541	0.457886	297.5	18.75	1008.53	0.391753
SCR	21.6755	0.653236	752.5	517.5	3529.39	0.177752
SCR	23.5342	0.533241	128.75	143.75	2204.59	0.29391
SCR	50.0446	0.29666	257.5	211.25	2477.79	0.44575
SCR	17.1127	0.160715	283.75	122.5	6047.54	0.0426766
SCR	11.7806	0.424653	186.25	11.25	725.401	0.439019
SCR	23.4258	0.278488	42.5	42.5	3423.17	0.169127
SCR	18.2644	0.369445	161.25	83.75	4967.68	0.00618539
SCR	20.591	0.671177	15	47.5	9371.91	0.0239829
SCR	28.3894	0.329033	360	147.5	4211.06	0.162894
SCR	21.4689	0.635143	35	32.5	1920.82	0.270641
SCR	16.1953	0.485026	15	17.5	729.229	0.456241
SCR	26.2212	0.600336	13.75	15	927.744	0.334857
SCR	24.6442	0.556448	160	93.75	2714.33	0.171121
SCR	23.0973	0.260161	17.5	17.5	5263.35	0.0718874
SCR	24.2536	0.629874	6.25	12.5	136.002	0.769028
SCR	23.2073	0.470909	90	88.75	2669.03	0.226614
SCR	11.5073	0.400805	467.5	250	3749.98	0.183316
SCR	16.5068	0.453522	16.25	12.5	377.541	0.540467
SCR	19.116	0.649861	30	28.75	840.929	0.46068
SCR	19.4788	0.533195	6.25	10	158.719	0.676664
SCR	24.4106	0.463215	36.25	45	3862.13	0.0409297
SCR	26.0507	0.305985	40	50	1980.41	0.342604
SCR	20.8369	0.512699	26.25	32.5	3080.94	0.0956998
SCR	25.8544	0.658901	32.5	33.75	750.653	0.443283
SCR	24.2798	0.200606	363.75	78.75	2840.02	0.140292
SCR	15.2644	0.401948	22.5	38.75	2185.07	0.204848
SCR	22.3692	0.300813	31.25	6.25	688.735	0.463145
SCR	23.2895	0.462481	8.75	12.5	1069.69	0.31888
SCR	20.7143	0.0773887	76.25	73.75	3512.2	0.327983
SCR	24.6958	0.086674	21.25	13.75	4182.91	0.0822281
SCR	22.4261	0.499198	75	63.75	1894.5	0.323619
SCR	23.7496	0.682067	27.5	25	554.919	0.54468
SCR	29.6616	0.355018	842.5	93.75	5078.99	0.0574174
SCR	19.8351	0.505957	13.75	23.75	777.643	0.441168
SCR	8.13686	0.12863	176.25	147.5	4588.24	0.0318976
SCR	35.4677	0.517311	27.5	20	1092.4	0.325599
SCR	36.9275	0.312669	17.5	16.25	2483.93	0.167376
SCR	53.5356	0.231802	3.75	18.75	7539.05	0.0573266
SCR	25.5074	0.167026	147.5	135	2498.08	0.456107
SCR	24.9777	0.560391	45	32.5	265.14	0.779741
SCR	23.6422	0.471424	22.5	5	167.897	0.625021
SCR	22.7921	0.573264	15	15	882.501	0.337176
SCR	25.1808	0.550812	7.5	6.25	244.702	0.528135
SCR	22.1404	0.575841	16.25	7.5	139.634	0.667659
SCR	26.4388	0.433434	280	31.25	5249.64	0.000527209
SCR	25.8051	0.556099	7.5	10	319.64	0.524879
SCR	39.2507	0.521535	477.5	25	830.236	0.429825
SCR	22.3977	0.340528	17.5	6.25	449.772	0.535816
SCR	30.2776	0.534665	162.5	190	2903.69	0.126925
SCR	33.7006	0.485812	402.5	136.25	2891.78	0.183028
SCR	38.3649	0.426247	47.5	10	817.779	0.370126
SCR	21.5577	0.512579	17.5	12.5	536.244	0.492911
SCR	30.3825	0.225771	958.75	282.5	4801.91	0.106361
SCR	22.9591	0.31459	20	22.5	3876.03	0.126715
SCR	26.1239	0.643884	18.75	13.75	781.721	0.360486
SCR	13.8658	0.637722	42.5	26.25	3662.4	0.0973623
SCR	19.4788	0.293317	187.5	106.25	4459.88	0.0234803
SCR	14.9696	0.230449	237.5	38.75	6411.5	0.0780854
SCR	23.4258	0.499974	13.75	35	2029.43	0.195678
SCR	27.3152	0.689155	135	123.75	1331.12	0.455873
SCR	26.7023	0.585714	51.25	38.75	841.202	0.465409
SCR	18.0893	0.492255	681.25	440	5234.96	0.100426
SCR	31.8954	0.52983	91.25	65	2160	0.279163
SCR	18.1946	0.434447	10	6.25	546.899	0.427663
SCR	27.1046	0.171443	40	73.75	6114.65	0.0418473
SCR	20.4358	0.538694	17.5	12.5	627.4	0.420706
SCR	26.8213	0.524218	10	41.25	887.55	0.472692
SCR	23.8833	0.498407	15	10	487.557	0.456834
SCR	22.3692	0.116619	38.75	33.75	7997.81	0.0348713
SCR	15.4716	0.568518	15	13.75	213.668	0.660151
SCR	28.367	0.528941	8.75	11.25	282.303	0.58464
SCR	17.1499	0.527494	128.75	16.25	4192.33	0.0695798
SCR	8.95623	0.382691	3.75	5	1256.76	0.28942
SCR	26.5109	0.427716	15	11.25	2626.88	0.174999
SCR	28.4566	0.207316	32.5	23.75	2636.9	0.183374
SCR	21.6461	0.460521	7.5	8.75	444.067	0.483365
SCR	23.4258	0.428326	3.75	6.25	1039.68	0.310453
SCR	27.7315	0.754424	6.25	5	52.4814	0.732712
SCR	27.3385	0.622912	535	177.5	2830.06	0.303072
SCR	22.9314	0.468177	6.25	38.75	1816.76	0.270118
SCR	25.9282	0.509184	76.25	70	2892.13	0.16229
SCR	20.2795	0.361666	8.75	18.75	2259.91	0.246074
SCR	26.2939	0.122914	16.25	11.25	6100.68	0.101726
SCR	24.6958	0.529589	31.25	27.5	1254.15	0.303739
SCR	21.3499	0.40243	40	43.75	2165.37	0.241195
SCR	32.5083	0.625374	135	141.25	5101.96	0.145873
SCR	8.05824	0.326313	43.75	37.5	6027.41	0.0481499
SCR	26.3664	0.56826	266.25	162.5	2938.99	0.164337
SCR	31.0458	0.581252	250	16.25	872.221	0.343793
SCR	23.2347	0.423557	10	15	1618.52	0.262784

## Sheet: Breast Cancer Panel
Cell Line	Diameter	Strain	Transit Time	Entry Time	Elastic Modulus	Beta
	um	-	ms	ms	Pa	-
MCF7	23.8566	0.375977	40	39	2205.54	0.295968
MCF7	21.2303	0.35312	23	19	1974.61	0.291237
MCF7	23.5071	0.439754	8	12.5	4013.21	0.119959
MCF7	19.6416	0.219895	8.5	4	987.237	0.41378
MCF7	28.2095	0.423512	364	341.5	3927.58	0.271069
MCF7	22.4545	0.220293	6.5	2.5	3630.9	0.0307553
MCF7	24.8756	0.389159	94.5	102	3554.19	0.180236
MCF7	22.3123	0.347322	31.5	25	1740.73	0.352644
MCF7	19.674	0.273325	6	2.5	405.13	0.484629
MCF7	30.8607	0.35419	134	126	3287.4	0.292833
MCF7	26.3181	0.367509	54	52.5	5882.16	0.0627617
MCF7	20.9283	0.315156	32	23	1673.83	0.385795
MCF7	23.1249	0.393677	90.5	71.5	4368.64	0.0957148
MCF7	22.5394	0.356983	119	114.5	3414.28	0.311
MCF7	21.1703	0.332597	8.5	5.5	387.767	0.543447
MCF7	11.7806	0.368107	210.5	159.5	3365.34	0.308717
MCF7	19.8992	0.292098	16	2	6055.51	0.0257207
MCF7	19.4788	0.280687	24.5	12	1575.44	0.368255
MCF7	21.9092	0.300399	54	40.5	3001.69	0.289263
MCF7	24.0427	0.353912	39	28	2518.13	0.246434
MCF7	13.4462	0.339117	66.5	52.5	2874.74	0.269583
MCF7	21.4689	0.315489	172	140	4255.64	0.300485
MCF7	26.3664	0.383011	309	307.5	4444.65	0.260283
MCF7	20.2795	0.238529	36	23.5	2879.15	0.317905
MCF7	20.591	0.258254	22.5	16.5	2903.44	0.287379
MCF7	22.1116	0.336905	50.5	30	4499.36	0.114515
MCF7	23.6152	0.602039	16	12.5	993.348	0.294513
MCF7	29.2292	0.547409	936	880	4163.32	0.120052
MCF7	25.332	0.40732	204.5	192.5	4174.54	0.187472
MCF7	23.3986	0.392141	84.5	69.5	2807.59	0.275383
MCF7	20.4358	0.30631	6	3	53.4526	0.83128
MCF7	19.8351	0.291782	7	4	900.524	0.381865
MCF7	15.389	0.40821	33.5	40	2690.13	0.217544
MCF7	22.6801	0.375739	81	75	2918.38	0.279315
MCF7	23.8833	0.373038	274.5	251.5	3816.59	0.363647
MCF7	21.1703	0.319262	13	10	1503.09	0.322025
MCF7	22.3408	0.340224	32.5	22.5	2216.06	0.280551
MCF7	22.6521	0.359762	116	100	2788.63	0.371048
MCF7	23.1799	0.372353	286.5	242	4172.11	0.244262
MCF7	23.2073	0.379877	41.5	33	2141.47	0.299013
MCF7	19.803	0.251588	7.5	2.5	307.13	0.553947
MCF7	22.8201	0.368958	47	34.5	2523.49	0.262599
MCF7	27.1515	0.422023	652.5	602.5	4687.18	0.148944
MCF7	31.9553	0.43768	79	79.5	1729.99	0.345994
MCF7	20.9587	0.352932	221.5	173	4249.08	0.231224
MCF7	21.6166	0.33718	23.5	16	1732.43	0.31379
MCF7	22.1116	0.321401	37	32	2466.93	0.311514
MCF7	21.4689	0.309247	5.5	3.5	203.074	0.625792
MCF7	21.6461	0.295693	22.5	3	857.367	0.259447
MCF7	27.9601	0.583096	38	45	1498.3	0.33541
MCF7	23.1799	0.353742	10	6.5	988.836	0.366772
MCF7	22.8758	0.361889	82	73.5	3333.96	0.241983
MCF7	24.0427	0.399904	22	19	1878.37	0.262293
MCF7	24.773	0.45825	172	175.5	3828.43	0.176444
MCF7	24.0956	0.362209	14.5	9.5	1089.1	0.355548
MCF7	23.9897	0.388311	21.5	17	1528.7	0.319027
MCF7	28.6128	0.41081	13.5	12.5	754.427	0.440612
MCF7	21.9092	0.380318	7	3.5	1192.28	0.275906
MCF7	23.2347	0.733573	162	167	2390.49	0.124478
MCF7	25.2565	0.372339	25	27.5	824.811	0.515257
MCF7	20.9891	0.351381	18.5	6	1183.82	0.320031
MCF7	21.3797	0.369693	7	2.5	737.2	0.338213
MCF7	24.3845	0.382748	53.5	51	2557.64	0.262043
MCF7	19.5441	0.282471	12	4	295.759	0.587681
MCF7	21.0194	0.31192	51.5	36	2727.85	0.292402
MCF7	23.5071	0.371432	98.5	89	3024.09	0.308504
MCF7	24.7215	0.38537	45	47	2621.9	0.233747
MCF7	25.607	0.450505	9	8.5	655.141	0.387298
MCF7	22.7921	0.348629	15	12	1657.53	0.30152
MCF7	22.4545	0.350804	36	29.5	2373.26	0.277119
MCF7	30.9225	0.338243	31.5	26.5	1986.74	0.324034
MCF7	22.3692	0.412183	40	37.5	1752.6	0.415098
MCF7	22.054	0.343974	24	17.5	2130.76	0.273729
MCF7	21.2303	0.209967	18	11	2690.95	0.212333
MCF7	23.2621	0.381944	12.5	10	1562.64	0.289628
MCF7	22.054	0.329039	11.5	7.5	1799.25	0.270836
MCF7	22.3408	0.349986	16	12.5	1588.45	0.318543
MCF7	23.6691	0.318078	17.5	13.5	1897.13	0.295836
MCF7	16.8125	0.455321	71.5	75.5	3414.32	0.142804
MCF7	27.7315	0.487609	3	4.5	925.186	0.283732
MCF7	22.1116	0.333995	4	3	1151.31	0.300586
MCF7	11.5073	0.422317	98.5	106.5	4390.1	0.110465
MCF7	21.7341	0.342334	188.5	161.5	3873.24	0.272454
MCF7	14.8843	0.0879126	3.5	3.5	2106.63	0.124607
MCF7	26.3664	0.36662	3.5	6	2777.19	0.155543
MCF7	23.3986	0.322189	436.5	395	6792.66	0.271106
MCF7	12.7662	0.410451	186	177.5	2967.99	0.350192
MCF7	11.8882	0.331789	39	40	2380.24	0.314593
MCF7	18.9487	0.251665	34	23.5	663.255	0.679563
MCF7	20.8369	0.330701	70	59	2806.5	0.312815
MCF7	31.2298	0.363444	104	107	3829.92	0.243931
MCF7	24.9522	0.412544	190	180.5	3542.42	0.271594
MCF7	22.6521	0.403946	460	456	4590.99	0.24026
MCF7	19.8992	0.297724	186.5	75	5027.18	0.170646
MCF7	23.3168	0.403269	113	109	2671.32	0.334912
MCF7	23.2895	0.467222	52	59.5	2641.72	0.292166
MCF7	20.0585	0.467264	18	14.5	1090.33	0.410234
MCF7	19.9631	0.357267	4.5	2.5	388.977	0.459056
MCF7	20.0585	0.484684	15	13	1088.85	0.35839
MCF7	21.2902	0.362643	12	8	1092.34	0.35747
MCF7	22.3123	0.375053	23	23.5	1868.88	0.304396
MCF7	21.5281	0.595661	62.5	29	6194.98	0.0376661
MCF7	20.9891	0.398942	16.5	12.5	1636.88	0.296415
MCF7	14.0028	0.431566	31	27.5	1831.96	0.283607
MCF7	22.6239	0.403453	40	32	2183.07	0.247703
MCF7	24.9522	0.512984	57	54	2277.2	0.242276
MCF7	24.5406	0.473774	59	73	2445.16	0.248813
MCF7	20.6219	0.438173	12	15.5	243.545	0.760226
MCF7	20.1851	0.302638	8	5	957.729	0.371674
MCF7	19.4134	0.339592	24.5	12	1702.73	0.310913
MCF7	26.3906	0.442646	91.5	2.5	533.499	0.371043
MCF7	21.6461	0.484648	14.5	19.5	579.137	0.557619
MCF7	15.757	0.556404	77.5	80.5	2425.96	0.180397
MCF7	31.2502	0.535913	158.5	143	2966.93	0.171805
MCF7	23.3441	0.401883	83.5	80	3225.38	0.262367
MCF7	23.5612	0.438761	14	14.5	317.5	0.642935
MCF7	20.6835	0.31608	6	4	1121.68	0.336407
MCF7	12.7162	0.39305	42.5	38	2041.27	0.334241
MCF7	22.6239	0.359775	13.5	16	4274.23	0.110058
MCF7	23.7228	0.40354	20.5	27	1088.52	0.355449
MCF7	24.4627	0.443423	41.5	42	1702.9	0.309023
MCF7	25.1808	0.455728	197	190	4401.62	0.110493
MCF7	20.7757	0.376545	29	22.5	2495.32	0.221493
MCF7	21.7341	0.382885	4	2	552.361	0.377918
MCF7	22.8201	0.409229	98	89	3384.45	0.179768
MCF7	36.9792	0.499849	37.5	29	2274.64	0.157231
MCF7	20.745	0.395026	21	16.5	1386.47	0.338622
MCF7	13.4462	0.580035	7	7	498.59	0.403235
MCF7	21.2003	0.34737	7.5	6.5	616.962	0.447498
MCF7	27.3617	0.49052	99.5	93.5	3070.96	0.16862
MCF7	20.4669	0.319074	26.5	23	2248.31	0.303746
MCF7	24.6442	0.410657	201	200	3823.21	0.264194
MCF7	19.2156	0.404185	2.5	2	37.5792	0.784765
MCF7	22.9036	0.458874	36.5	29.5	2058.63	0.2381
MCF7	22.054	0.450995	23.5	18.5	1547.87	0.269834
MCF7	16.0769	0.514582	18	18.5	3051.06	0.0900613
MCF7	18.8138	0.426742	4.5	2	774.314	0.300445
MCF7	20.4046	0.368443	5	2.5	191.552	0.549283
MCF7	23.0973	0.431322	5	9.5	61.657	0.922102
MCF7	21.5872	0.439791	5.5	5	1959.3	0.174278
MCF7	24.9777	0.62041	18	2.5	424.552	0.358142
MCF7	25.2313	0.483253	3	8.5	70.981	0.904784
MCF7	12.4634	0.476853	53	66.5	2694.06	0.202942
MCF7	22.6801	0.456145	62	54.5	2029.98	0.283714
MCF7	23.48	0.477978	18.5	23	902.384	0.43845
MCF7	20.6219	0.367374	9.5	6.5	544.588	0.478847
MCF7	22.4261	0.386846	9.5	7.5	816.91	0.384302
MCF7	18.9151	0.333723	16	8.5	577.682	0.502903
MCF7	23.0422	0.423588	25.5	25.5	2508.35	0.187364
MCF7	22.6801	0.37094	25.5	20	1544.31	0.331511
MCF7	22.9591	0.370068	14.5	12.5	2018.33	0.239733
MCF7	21.5872	0.342753	5	3	871.957	0.334429
MCF7	26.2212	0.510094	13	20	1840.68	0.245903
MCF7	26.9397	0.453431	14	12.5	1389.28	0.250843
MCF7	22.2837	0.389581	167.5	167	3652.48	0.252442
MCF7	21.0799	0.333798	17.5	13.5	1794.68	0.303564
MCF7	22.6239	0.545455	26.5	12.5	884.521	0.407199
MCF7	21.4392	0.35473	14	9.5	752.743	0.449018
MCF7	20.9587	0.334255	19.5	14	1297.68	0.389287
MCF7	20.1535	0.312485	22	12.5	1735.27	0.306366
MCF7	21.8801	0.369485	10	6	574.984	0.458552
MCF7	27.0811	0.344792	34.5	27.5	1591.07	0.385576
MCF7	19.1824	0.331572	10	4.5	354.48	0.537035
MCF7	19.9631	0.303415	46.5	38.5	2469.49	0.365909
MCF7	15.5536	0.453901	34	30.5	2528.32	0.190214
MCF7	22.9036	0.39741	79	72.5	3443.12	0.199938
MCF7	19.7063	0.336957	25	15	1823.46	0.304861
MCF7	21.2603	0.377561	61	58.5	5550.58	0.0754773
MCF7	20.8063	0.366794	63	53.5	2513.95	0.301234
MCF7	26.0751	0.537259	610	544	3667.76	0.179076
MCF7	23.5071	0.422913	62.5	60.5	2836.89	0.221514
MCF7	22.6521	0.421911	50.5	44.5	2548.45	0.226645
MCF7	12.8159	0.299745	11.5	5	1284.18	0.327438
MCF7	23.9631	0.473571	243	224.5	3088.46	0.269198
MCF7	22.9868	0.427327	75	68	2235.95	0.322425
MCF7	20.4358	0.360942	8.5	6	671.662	0.430774
MCF7	22.1404	0.331221	86.5	36.5	6373.22	0.0215951
MCF7	22.9314	0.452119	44	49.5	3183.27	0.11566
MCF7	24.4887	0.495778	18	5	581.372	0.362014
MCF7	14.8843	0.43859	5.5	3	109.443	0.642419
MCF7	31.7754	0.417341	68.5	66	2137.99	0.228284
MCF7	20.9891	0.405903	24.5	22	2028.7	0.264094
MCF7	22.2265	0.432521	27	23.5	2159.04	0.2369
MCF7	10.28	0.348588	9.5	7.5	1181.25	0.344643
MCF7	26.0995	0.526283	1414	1338.5	4365.9	0.182967
MCF7	21.9092	0.408752	276.5	279	3863.42	0.285207
MCF7	25.6567	0.427552	29	29.5	2155.62	0.252106
MCF7	23.0698	0.439021	63.5	70.5	3193.9	0.171582
MCF7	14.0028	0.390772	10.5	8.5	1194.08	0.32283
MCF7	21.3797	0.382335	16	12.5	1014.31	0.402988
MCF7	27.1515	0.460087	228	229.5	3693	0.187002
MCF7	23.2621	0.415014	314.5	309.5	4507.26	0.191006
MCF7	21.4095	0.387381	24.5	20	1846.49	0.300582
MCF7	14.5819	0.469032	1345	54.5	2073.96	0.315408
MCF7	22.7362	0.398968	20	18	2285.12	0.215125
MCF7	25.5074	0.524066	48	50	1806.44	0.250884
MCF7	19.6091	0.384952	45.5	34	3073.42	0.193472
MCF7	23.9099	0.456191	28.5	28.5	1905.28	0.272523
MCF7	25.1049	0.48149	165.5	156	3707.77	0.112834
MCF7	24.1484	0.479332	12.5	11	767.339	0.378477
MCF7	19.9631	0.399857	22	14.5	2216.67	0.229564
MCF7	22.9868	0.471088	26.5	25	1688.24	0.278073
MCF7	20.4046	0.47108	183	188.5	3506.12	0.183728
MCF7	14.2283	0.0798957	31	31.5	1774.68	0.271183
MCF7	22.1978	0.487594	14.5	13.5	1450.19	0.261964
MCF7	22.5394	0.745211	3.5	6	1925.23	0.160062
MCF7	21.9962	0.468307	19.5	20	1779.2	0.239822
MCF7	23.2073	0.435794	148	137.5	2986.51	0.304339
MCF7	25.0795	0.427606	144	136.5	3244.89	0.231395
MCF7	27.4778	0.52907	47	49	5593.32	0.00817941
MCF7	23.8833	0.458728	78.5	78.5	3078.88	0.180788
MCF7	30.3825	0.186797	152	125.5	10964.7	0.0434725
MCF7	19.5766	0.304022	68	56	4912.38	0.194832
MCF7	20.2795	0.314862	16.5	11	1638.67	0.333775
MCF7	28.0056	0.665562	251.5	3	661.74	0.270687
MCF7	18.8476	0.430055	8.5	14	682.766	0.521514
MCF7	25.3572	0.358884	85	81.5	2689.14	0.321312
MCF7	20.4669	0.374838	26	23	2276.66	0.256822
MCF7	12.1005	0.402186	14	13.5	1245.87	0.335005
MCF7	21.0194	0.346318	29.5	25.5	2060.89	0.322553
MCF7	21.6755	0.430301	139	136	3270.42	0.180828
MCF7	27.7774	0.508785	216.5	205	3316.44	0.144352
MCF7	21.0496	0.352772	28	25	2028.99	0.309666
MCF7	22.2551	0.449776	125	120.5	4286.22	0.062199
MCF7	22.6521	0.434635	22	26.5	2416.36	0.223395
MCF7	20.7757	0.316145	6.5	5	988.501	0.372316
MCF7	28.0056	0.484573	164.5	185	3674.6	0.109965
MCF7	23.4258	0.421194	166	144	3569.94	0.192333
MCF7	20.2166	0.399216	7.5	13	935.151	0.473101
MCF7	10.7641	0.425022	128	118	3069.34	0.271162
MCF7	28.0284	0.557613	78	58	3442.15	0.100931
MCF7	25.332	0.422907	1844.5	1708.5	5524.77	0.104363
MCF7	29.0544	0.450574	30	23.5	2244.66	0.195172
MCF7	26.8687	0.572027	174.5	180.5	2720.25	0.213744
MCF7	23.7228	0.767177	167.5	24.5	2194.66	0.177342
MCF7	22.054	0.439039	193.5	198.5	5763.7	0.0231318
MCF7	23.1524	0.424199	90	83.5	2743.8	0.265397
MCF7	17.9834	0.498666	5.5	11	308.469	0.647327
MCF7	24.0427	0.428119	75.5	75.5	2970.34	0.219565
MCF7	24.0692	0.447363	3.5	3	670.488	0.326529
MCF7	24.7215	0.418666	163.5	167	3564.25	0.22948
MCF7	21.1402	0.3402	13.5	10.5	1659.75	0.299201
MCF7	25.9772	0.421637	43	43	2403.01	0.265524
MCF7	25.4824	0.619338	114	105	2458.14	0.229869
MCF7	23.4529	0.426885	91	85	3300.42	0.182925
MCF7	13.7273	0.138279	608.5	6	257.566	0.652861
MCF7	22.9868	0.434203	249	251	4002.74	0.266312
MCF7	25.4574	0.438187	459.5	33.5	3236.77	0.0828895
MCF7	21.2902	0.372226	33	29.5	1654.96	0.386306
MCF7	25.4574	0.633167	56	50.5	1390.58	0.257384
MCF7	14.0028	0.414935	23.5	19.5	1847.75	0.260522
MCF7	27.0105	0.644512	268	274	3053.6	0.114129
MCF7	22.8201	0.396513	267.5	264.5	4267.39	0.228202
MCF7	23.2347	0.511264	51	3.5	872.729	0.261345
MCF7	14.3619	0.329235	5	4	980.732	0.335167
MCF7	19.0492	0.297263	10	5	1133.22	0.356152
MCF7	16.8125	0.538921	521.5	436.5	3483.06	0.0751249
MCF7	24.201	0.506636	25	24	2357.34	0.159944
MCF7	22.7642	0.51247	9	8	820.713	0.32472
MCF7	20.8369	0.489983	17	12.5	1028.52	0.328112
MCF7	22.6801	0.494513	64.5	60.5	2845.99	0.173674
MCF7	22.4545	0.49386	16	13.5	1244.01	0.290574
MCF7	26.0751	0.499157	27.5	32	3310.4	0.139656
MCF7	23.2347	0.430159	79.5	73	3009.4	0.206171
MCF7	23.7496	0.506095	18.5	17.5	1696.7	0.240928
MCF7	23.2347	0.40462	62	59.5	3331.05	0.218514
MCF7	26.2454	0.460852	4	3.5	351.938	0.449233
MCF7	23.0973	0.378491	12.5	8.5	1077.04	0.351911
MCF7	21.0799	0.373987	3.5	2.5	109.553	0.658327
MCF7	22.5676	0.355381	15	13	2226.48	0.255404
MCF7	20.7143	0.299708	4	2	234.302	0.548778
MCF7	23.3713	0.459618	12.5	12.5	421.58	0.508191
MCF7	21.7634	0.409663	25	19.5	1747.25	0.271869
MCF7	23.9099	0.521309	39	44	3573.48	0.16169
MCF7	22.1404	0.444987	8.5	7.5	834.616	0.356505
MCF7	18.8476	0.306941	3.5	2.5	202.515	0.589248
MCF7	21.0799	0.334486	21.5	18	1584.18	0.355089
MCF7	6.48204	0.399288	24	25.5	1771.72	0.321701
MCF7	9.70668	0.560418	25.5	22.5	2411.15	0.176259
MCF7	13.4935	0.425055	6.5	11	2275.84	0.220449
MCF7	7.73578	0.455807	16	20.5	2069.82	0.20681
MCF7	13.0619	0.311807	4	3	162.937	0.640274
MCF7	21.3201	0.364098	10.5	9	1161.92	0.358558
MCF7	18.9151	0.285362	8.5	4	438.002	0.51975
MCF7	19.2818	0.439113	4.5	9	1717.96	0.303623
MCF7	11.3961	0.430951	55.5	56.5	2368.16	0.261575
MCF7	19.0492	0.234268	4.5	2.5	887.315	0.386877
MCF7	18.4033	0.245692	6	5	852.408	0.439188
MCF7	22.9036	0.367408	20.5	18	1737.34	0.325791
MCF7	29.4245	0.565366	10	8.5	2279.2	0.0987944
MCF7	20.6527	0.401567	14	19	3588.69	0.164926
MCF7	23.4529	0.387778	27	24.5	1329	0.412293
MCF7	22.2551	0.351403	20	17.5	1519.17	0.342849
MCF7	22.7082	0.665513	76	71.5	1648.75	0.343729
MCF7	21.1402	0.431076	27.5	31	1080.35	0.468413
MCF7	21.0496	0.318909	5.5	3	246.464	0.567512
MCF7	23.5071	0.478092	29.5	33.5	788.82	0.509338
MCF7	24.3322	0.604311	39	36	2429.4	0.148023
MCF7	23.9365	0.590845	118.5	116.5	3047.11	0.126377
MCF7	19.8351	0.489502	1.5	7	1307.52	0.362154
MCF7	12.8159	0.430382	142.5	128	3688.14	0.215463
MCF7	24.3322	0.368458	53.5	42.5	3191.06	0.164078
MCF7	22.3692	0.252618	3	7	4835.13	0.0879144
MCF7	23.5071	0.390214	38.5	33.5	1931.88	0.306949
MCF7	13.3512	0.405006	92	89	3446.99	0.222284
MCF7	22.8479	0.262598	65	35	2305.75	0.179541
MCF7	31.2909	0.394857	30.5	23	3519.39	0.133399
MCF7	25.879	0.495865	77	57	1630.37	0.285657
MCF7	21.2303	0.368999	6	10.5	3938.38	0.117146
MCF7	22.5111	0.457186	1.5	6.5	64.8038	0.915298
MCF7	24.1747	0.453261	2485	2331	6160.11	0.206721
MCF7	14.3175	0.396327	15	11.5	1600.51	0.286803
MCF7	28.2095	0.302054	4	3	626.774	0.419513
MCF7	22.4545	0.420221	48.5	33.5	2595.68	0.207575
MCF7	21.9962	0.410589	17.5	9.5	1201.06	0.322048
MCF7	19.3477	0.377605	4	3.5	467.468	0.4479
MCF7	20.0267	0.488543	4.5	9.5	3236.25	0.133207
MCF7	14.7555	0.404406	47	42	2120.67	0.299569
MCF7	21.0194	0.40801	15.5	13.5	1208.48	0.347303
MCF7	19.7063	0.602197	5	5.5	123.573	0.645026
MCF7	23.2895	0.622915	12	12	1046.63	0.27972
MCF7	23.1524	0.430088	43	40	1320.07	0.414682
MCF7	17.6619	0.316199	3	2.5	251.929	0.54894
MCF7	11.9416	0.579337	276.5	23.5	3082.61	0.0913749
MCF7	16.3518	0.457605	35.5	35	3181.55	0.147944
MCF7	20.1851	0.503263	11	12.5	110.163	0.810562
MCF7	28.6795	0.558959	400	396.5	3463.7	0.141235
MCF7	22.7362	0.539036	6	5	506.008	0.383211
MCF7	21.7926	0.540211	7	5.5	1641.19	0.177705
MCF7	25.6815	0.487588	102.5	100	2473.29	0.250458
MCF7	23.1524	0.42326	36.5	31.5	2242.29	0.243683
MCF7	22.054	0.394841	26	18.5	1599.04	0.303288
MCF7	26.7023	0.473222	184.5	204	3684.78	0.140509
MCF7	15.6759	0.382674	8	5.5	1025.88	0.333269
MCF7	16.6221	0.531981	109	115	2917.76	0.156866
MCF7	28.746	0.546807	3	8.5	1018.29	0.374123
MCF7	21.5281	0.439363	4	9	3477.34	0.13528
MCF7	22.0828	0.393063	8.5	5	1084.82	0.312102
MCF7	20.4358	0.350188	6.5	4.5	345.261	0.535457
MCF7	15.5126	0.660371	12.5	6	1341.38	0.18179
MCF7	15.4304	0.468915	6	7.5	2056.16	0.169403
MCF7	24.0162	0.423074	41	37.5	2648.55	0.201539
MCF7	14.5381	0.414147	4.5	4	272.579	0.522319
MCF7	22.1978	0.357093	8.5	5.5	638.569	0.431708
MCF7	21.7048	0.511662	4.5	9.5	2173.73	0.213311
MCF7	15.3061	0.386951	5	3	956.334	0.304872
MCF7	20.6219	0.354789	22	17	2077.3	0.267858
MCF7	6.48204	0.463712	42	40.5	2288.05	0.245583
MCF7	25.6567	0.378563	165.5	141.5	4779.34	0.0553055
MCF7	23.3441	0.519309	7	11.5	713.689	0.433675
MCF7	27.501	0.511644	27	30	1568.41	0.278048
MCF7	23.7228	0.469553	1614	1612	5271.63	0.118627
MCF7	22.1691	0.365951	28.5	24	2609.41	0.225232
MCF7	20.56	0.287678	4	2	197.353	0.569917
MCF7	22.9314	0.372896	69	65.5	2289.63	0.323392
MCF7	21.6755	0.303287	9.5	5.5	1498.41	0.291571
MCF7	24.6958	0.400312	214.5	217.5	4192.65	0.253097
MCF7	24.1484	0.409936	45.5	35.5	2098.47	0.301987
MCF7	15.1388	0.408532	119.5	130	3363.11	0.224782
MCF7	25.4073	0.439054	936.5	911	4829.2	0.267845
MCF7	31.3113	0.331909	16.5	15	2122.27	0.286131
MCF7	25.6815	0.403648	44	38.5	2360.08	0.269057
MCF7	23.0145	0.394743	44	42	3076.79	0.198632
MCF7	22.4545	0.428455	73	65	2718.34	0.246169
MCF7	29.0544	0.416433	335.5	339	4528.72	0.165971
MCF7	22.9868	0.391388	108.5	96.5	3758.48	0.184079
MCF7	26.5829	0.438886	86	94	2943.84	0.218247
MCF7	24.3584	0.553743	313	317	3629.33	0.057078
MCF7	20.56	0.337741	27	15.5	1943.6	0.299711
MCF7	22.8201	0.432227	131.5	119	3145.41	0.222314
MCF7	22.7082	0.404414	209.5	181	3315.44	0.278325
MCF7	26.2939	0.432071	72	82.5	3197.23	0.180099
MCF7	19.9631	0.436058	28.5	32.5	6092.59	0.0511788
MCF7	25.4073	0.44528	46.5	51	2533.1	0.232905
MCF7	25.4824	0.453396	2133	2073.5	5166.07	0.148415
MCF7	22.2837	0.359611	14	8.5	955.942	0.369741
MCF7	22.9036	0.401833	41.5	36.5	2327.76	0.258951
MCF7	21.4985	0.373792	29.5	18	2067.45	0.264432
MCF7	23.0422	0.404242	28	24.5	1961.21	0.281158
MCF7	24.4366	0.441222	75	84.5	2840.11	0.24722
MCF7	17.2977	0.0548954	4	10	406.262	0.620208
MCF7	22.5394	0.460338	61	11.5	4322.08	0.0103468
MCF7	25.0541	0.560696	23.5	21	2226.2	0.153373
MCF7	25.5572	0.443677	226	234	3982.61	0.216073
MCF7	9.90149	0.443284	1036	1011.5	4751.44	0.0917922
MCF7	23.5071	0.450535	32.5	35	4355.14	0.115872
MCF7	21.5281	0.34603	32.5	24	2085.24	0.298952
MCF7	21.7634	0.341463	57.5	27	2148.94	0.303448
MCF7	26.3664	0.478321	1391.5	1342.5	4904.77	0.154404
MCF7	18.7121	0.277212	9	3	450.351	0.478484
MCF7	27.8917	0.351531	3.5	2	365.431	0.44539
MCF7	21.0496	0.361269	6.5	2.5	426.052	0.434598
MCF7	23.0145	0.4276	15.5	12.5	1333.28	0.310481
MCF7	25.1808	0.444134	31	41.5	3074.41	0.13902
MCF7	22.3692	0.425931	22	20.5	808.212	0.461864
MCF7	21.5281	0.362691	13	7.5	1031.92	0.355777
MCF7	23.9365	0.422468	102	98	3396.42	0.178911
MCF7	23.0145	0.261296	210.5	141	8195.61	0.00059867
MCF7	21.9382	0.373446	5.5	3	436.726	0.438805
MCF7	23.0973	0.411854	41	31.5	1890.39	0.301098
MCF7	21.2603	0.522466	24	30	460.155	0.618853
MCF7	9.83698	0.420268	297	308.5	3953.7	0.227696
MCF7	21.8801	0.37203	17	14	1849.45	0.269776
MCF7	12.9149	0.360173	30	23	1985.9	0.286322
MCF7	21.6166	0.384251	42.5	36.5	2088.93	0.312029
MCF7	21.1402	0.424261	63	54	2703.06	0.253243
MCF7	28.4119	0.365783	11	5.5	3034.86	0.147222
MCF7	13.5406	0.478211	119.5	117.5	3215.8	0.168233
MCF7	15.4716	0.472029	8.5	7	781.496	0.351516
MCF7	13.5875	0.468934	33.5	29	2231.4	0.200538
MCF7	18.1595	0.391065	5	2	47.9065	0.748719
MCF7	21.8801	0.392848	22.5	23	348.065	0.735406
MCF7	22.8479	0.411484	536.5	491.5	4533.93	0.339875
MCF7	20.4046	0.373036	34.5	22.5	1887.63	0.300244
MCF7	24.5925	0.409824	349.5	348.5	4356.5	0.236821
MCF7	22.1404	0.376469	126.5	119.5	3633.06	0.246339
MCF7	13.5406	0.348251	9.5	6.5	273.731	0.6084
MCF7	23.0422	0.428419	104.5	98	3291.63	0.209788
MCF7	14.1835	0.37902	40.5	34.5	3033.07	0.181813
MCF7	22.3692	0.390502	115	105	3195.27	0.240805
MCF7	24.8243	0.328412	753.5	730.5	6640.67	0.00559553
MCF7	23.0145	0.356901	82.5	76	3513.23	0.241355
MDA-MB-231	18.9487	0.264134	5	2	474.125	0.462748
MDA-MB-231	23.0698	0.367181	8	4.5	985.238	0.31865
MDA-MB-231	25.9036	0.4237	52	54.5	3062.43	0.165832
MDA-MB-231	22.8201	0.406783	20	10.5	672.472	0.446742
MDA-MB-231	19.9631	0.291512	28	3.5	147.081	0.684015
MDA-MB-231	17.3712	0.215482	19	2.5	624.496	0.451421
MDA-MB-231	19.116	0.281293	13	3	173.211	0.63705
MDA-MB-231	18.746	0.260284	20.5	2.5	164.862	0.643865
MDA-MB-231	18.8476	0.285239	12	6	70.4894	0.949673
MDA-MB-231	20.5291	0.348562	8	4	317.49	0.528454
MDA-MB-231	18.1946	0.255462	18	3	615.5	0.461651
MDA-MB-231	24.5147	0.404925	4.5	2.5	699.513	0.341896
MDA-MB-231	22.9591	0.417993	94	67.5	2386.73	0.29908
MDA-MB-231	20.745	0.325807	5	2.5	142.861	0.628642
MDA-MB-231	23.4529	0.432288	8.5	4.5	241.626	0.55556
MDA-MB-231	23.5883	0.404952	7.5	5	172.629	0.636317
MDA-MB-231	19.8672	0.350832	35.5	14	1124.89	0.392877
MDA-MB-231	21.11	0.362398	15	5.5	524.309	0.466873
MDA-MB-231	20.4358	0.320466	9.5	3	98.6251	0.708781
MDA-MB-231	21.0799	0.329677	13	5.5	729.141	0.41904
MDA-MB-231	23.6691	0.406473	200	146.5	3483.47	0.22884
MDA-MB-231	20.0267	0.204607	5.5	2	213.105	0.6202
MDA-MB-231	23.2073	0.413405	17	9	846.076	0.377908
MDA-MB-231	20.4358	0.310801	8.5	3.5	150.234	0.68629
MDA-MB-231	17.2977	0.426171	4.5	3.5	36.1762	0.859355
MDA-MB-231	20.56	0.320893	33	13	284.627	0.710198
MDA-MB-231	21.5577	0.356423	46	30	2571.85	0.267604
MDA-MB-231	22.9036	0.343066	1442.5	800.5	5231.3	0.0727311
MDA-MB-231	21.0799	0.306672	9	5	382.097	0.558599
MDA-MB-231	19.4134	0.35644	8.5	2.5	345.361	0.473432
MDA-MB-231	18.4379	0.238146	4.5	2	100.023	0.704229
MDA-MB-231	26.4628	0.425661	38	39	1958.76	0.279124
MDA-MB-231	18.1245	0.269072	22.5	8	621.744	0.515685
MDA-MB-231	7.22515	0.419588	762	64.5	3876.98	0.123108
MDA-MB-231	14.4503	0.379278	11.5	9	341.69	0.578021
MDA-MB-231	20.8063	0.317189	8.5	3	419.256	0.476412
MDA-MB-231	19.674	0.217632	6.5	3	292.516	0.589584
MDA-MB-231	20.9587	0.381015	8.5	4	452.046	0.455224
MDA-MB-231	21.7048	0.314607	22	12	2229.98	0.259406
MDA-MB-231	20.8674	0.299523	14	5	673.158	0.444091
MDA-MB-231	22.3408	0.323022	18.5	6.5	225.729	0.656122
MDA-MB-231	24.2536	0.422394	44	38.5	2812.98	0.184023
MDA-MB-231	26.4869	0.444573	139.5	121.5	3401.81	0.170959
MDA-MB-231	23.5612	0.404112	53.5	25	4233.92	0.0991289
MDA-MB-231	8.74039	0.531087	11.5	14	354.508	0.559727
MDA-MB-231	19.2818	0.238769	7.5	2	4135.73	0.121934
MDA-MB-231	22.8479	0.365742	60.5	38.5	2287.44	0.264059
MDA-MB-231	19.1824	0.509967	2.5	8	2248.39	0.2206
MDA-MB-231	20.3734	0.374183	14	5.5	31.6366	0.995338
MDA-MB-231	26.6068	0.470172	60.5	41	2269.02	0.221427
MDA-MB-231	7.73578	0.38161	12.5	9.5	1255.26	0.310476
MDA-MB-231	16.4294	0.303019	6.5	4.5	1012.13	0.359912
MDA-MB-231	20.4358	0.345853	14	8	1065.03	0.363788
MDA-MB-231	7.89865	0.338087	16	13.5	1349.74	0.347342
MDA-MB-231	23.8566	0.436144	278.5	282	4059.27	0.164253
MDA-MB-231	24.5666	0.428425	16	13.5	1589.66	0.257104
MDA-MB-231	8.05824	0.340286	17.5	12	1470.42	0.332666
MDA-MB-231	22.2551	0.395908	8	4.5	305.396	0.520633
MDA-MB-231	24.0956	0.418849	82.5	72	2803.09	0.219093
MDA-MB-231	22.8201	0.404763	19.5	13.5	1722.41	0.25764
MDA-MB-231	20.9891	0.320749	10	5	140.829	0.71148
MDA-MB-231	23.8032	0.368467	35	21	1779.9	0.302867
MDA-MB-231	26.75	0.276446	23	8.5	1247.94	0.399902
MDA-MB-231	22.8201	0.437598	11	8	246.93	0.594185
MDA-MB-231	25.6815	0.454824	1481.5	1398.5	5221.26	0.155289
MDA-MB-231	22.9591	0.431048	62.5	59	2768.37	0.249917
MDA-MB-231	20.0902	0.305441	28.5	17.5	1236.53	0.450975
MDA-MB-231	19.1492	0.295826	22.5	6	793.396	0.428241
MDA-MB-231	21.6166	0.422402	86	73	1614.83	0.434902
MDA-MB-231	19.8992	0.333831	16.5	4.5	1106.24	0.324305
MDA-MB-231	18.2295	0.346284	10	4	38.1571	0.921229
MDA-MB-231	20.8369	0.376003	12.5	8	853.375	0.398861
MDA-MB-231	20.0267	0.310457	21	11	1562.38	0.3071
MDA-MB-231	20.9891	0.409313	46	24.5	2190.14	0.240576
MDA-MB-231	21.2902	0.378552	77.5	39.5	1986.46	0.31755
MDA-MB-231	25.8051	0.492522	13.5	15	1489.72	0.255042
MDA-MB-231	13.9116	0.469392	24.5	21.5	1731.59	0.259731
MDA-MB-231	14.1835	0.3524	5	2.5	794.926	0.329215
MDA-MB-231	22.5394	0.458952	16.5	16.5	1291.24	0.308434
MDA-MB-231	19.7386	0.399775	18.5	11	446.788	0.530794
MDA-MB-231	9.77205	0.431301	25.5	17.5	987.734	0.380839
MDA-MB-231	14.8415	0.352171	18	9	1580.35	0.278675
MDA-MB-231	15.7973	0.470007	236	217.5	3520.82	0.157103
MDA-MB-231	12.9641	0.278357	9.5	3	323.167	0.533351
MDA-MB-231	20.0902	0.33898	7.5	3.5	920.78	0.339491
MDA-MB-231	16.3518	0.465326	249	248.5	3798.99	0.196287
MDA-MB-231	13.9573	0.0841917	37.5	15	1942.11	0.20459
MDA-MB-231	15.1388	0.406897	32.5	24	1844.03	0.28105
MDA-MB-231	13.3988	0.288756	8.5	2	371.613	0.465644
MDA-MB-231	14.1835	0.45975	30	28.5	2563.05	0.159375
MDA-MB-231	22.1691	0.471472	113	112	3081.7	0.189774
MDA-MB-231	22.8201	0.412765	9	4.5	363.92	0.477682
MDA-MB-231	21.2303	0.379881	8	4.5	897.784	0.339813
MDA-MB-231	25.879	0.446273	7.5	11	1308.21	0.275733
MDA-MB-231	23.0698	0.467804	19.5	18	2361.71	0.150179
MDA-MB-231	30.716	0.359792	727.5	12.5	3921.53	0.0801323
MDA-MB-231	13.3988	0.376575	21	15.5	1097.19	0.380248
MDA-MB-231	23.6152	0.463316	9	7.5	653.372	0.396372
MDA-MB-231	21.4689	0.384718	15	11	1146.71	0.354715
MDA-MB-231	22.0251	0.45391	3.5	2.5	492.631	0.381755
MDA-MB-231	20.4358	0.350699	9.5	3.5	122.12	0.670322
MDA-MB-231	19.5115	0.361045	8	4	86.9757	0.756996
MDA-MB-231	20.0267	0.364449	18.5	9	1309.46	0.310938
MDA-MB-231	13.2073	0.430657	9.5	7.5	455.851	0.486592
MDA-MB-231	26.8213	0.510156	4	3	195.234	0.516109
MDA-MB-231	25.5821	0.538241	30.5	43.5	2872.54	0.101801
MDA-MB-231	21.851	0.487688	12.5	7.5	583.685	0.397973
MDA-MB-231	26.3423	0.423441	53.5	2.5	21.3724	0.866075
MDA-MB-231	19.116	0.0918529	2	4	4696.08	0.0613846
MDA-MB-231	22.5676	0.50453	22	16	1477.33	0.251004
MDA-MB-231	9.57461	0.390665	16.5	14.5	1833.25	0.269385
MDA-MB-231	9.09728	0.446561	3.5	3	664.983	0.341424
MDA-MB-231	19.4461	0.382702	54	47.5	2806.83	0.246486
MDA-MB-231	17.9125	0.365514	9	5.5	218.027	0.623085
MDA-MB-231	11.672	0.376126	11	5	294.025	0.564779
MDA-MB-231	12.7162	0.402855	49	45	2350.03	0.250915
MDA-MB-231	11.8882	0.33219	7.5	4	173.079	0.64746
MDA-MB-231	19.803	0.38935	10.5	5	189.87	0.617454
MDA-MB-231	13.3034	0.351419	9.5	5.5	449.801	0.480683
MDA-MB-231	15.5536	0.41036	24	13.5	1387.44	0.308811
MDA-MB-231	15.6759	0.398195	16	8.5	793.246	0.401141
MDA-MB-231	14.7986	0.392999	22	17	1683.45	0.300888
MDA-MB-231	22.9591	0.441897	42.5	30	1982.08	0.252864
MDA-MB-231	19.3477	0.365043	9.5	3.5	393.067	0.474237
MDA-MB-231	10.6451	0.445525	30	26.5	1304.65	0.358544
MDA-MB-231	22.5394	0.546121	20	21	537.13	0.522563
MDA-MB-231	12.9149	0.388049	12	4.5	521.024	0.431702
MDA-MB-231	12.4634	0.472166	369	36.5	1736.06	0.284996
MDA-MB-231	20.9283	0.3586	8	3	248.95	0.54747
MDA-MB-231	21.2003	0.365073	7	3.5	274.421	0.543666
MDA-MB-231	17.6258	0.306895	7	2.5	223.922	0.569407
MDA-MB-231	19.5115	0.306461	6.5	2	623.904	0.383721
MDA-MB-231	19.9631	0.393241	7.5	5	167.479	0.639842
MDA-MB-231	26.7023	0.465859	176	164	3446.52	0.150241
MDA-MB-231	26.3906	0.461559	67	14	2181.15	0.167986
MDA-MB-231	21.5281	0.333469	16.5	13	1770.45	0.297617
MDA-MB-231	23.0145	0.399745	20	18.5	1624.91	0.303677
MDA-MB-231	18.9823	0.266149	5	3.5	1472.01	0.310516
MDA-MB-231	15.1388	0.367934	35	24.5	2012.37	0.291036
MDA-MB-231	21.1703	0.504581	6	9.5	70.9487	0.904156
MDA-MB-231	20.8369	0.420941	43	31.5	1930.33	0.297128
MDA-MB-231	22.4828	0.373444	21	16.5	1101.38	0.406194
MDA-MB-231	29.6186	0.400681	13.5	10.5	1173.53	0.335112
MDA-MB-231	21.2003	0.395125	16.5	14	1109.87	0.395064
MDA-MB-231	25.4324	0.384593	22	17	1773.29	0.277502
MDA-MB-231	20.7757	0.377206	30	20	1297.8	0.376696
MDA-MB-231	15.0545	0.393056	105.5	87.5	2965.25	0.271875
MDA-MB-231	14.8843	0.441328	37	35.5	2502.36	0.199814
MDA-MB-231	15.6759	0.496695	12.5	13	153.538	0.787159
MDA-MB-231	30.4662	0.41923	23.5	19	2141.11	0.22411
MDA-MB-231	18.2644	0.300307	5.5	2	802.584	0.348546
MDA-MB-231	23.8299	0.434325	6.5	6.5	532.849	0.430597
MDA-MB-231	20.5291	0.371597	6.5	4.5	696.68	0.385566
MDA-MB-231	18.8814	0.297413	8	3	103.815	0.720469
MDA-MB-231	21.0799	0.325594	11.5	6	559.694	0.472406
MDA-MB-231	23.3986	0.399058	21.5	17.5	2144.37	0.226775
MDA-MB-231	23.696	0.428889	83.5	76.5	3297.5	0.229317
MDA-MB-231	22.0828	0.377299	17.5	14	1918.34	0.257392
MDA-MB-231	14.9271	0.486061	3	2	132.303	0.570965
MDA-MB-231	21.7634	0.361227	14	10.5	1198.91	0.343288
MDA-MB-231	21.0194	0.293151	5	2	412.935	0.457536
MDA-MB-231	21.0194	0.330175	10	5.5	1620.23	0.265416
MDA-MB-231	20.0585	0.296721	5	2.5	423.968	0.467641
MDA-MB-231	19.9311	0.29624	5.5	2.5	224.754	0.571064
MDA-MB-231	21.7341	0.344608	7	4.5	735.777	0.384342
MDA-MB-231	25.4324	0.457386	53.5	44	2484.66	0.204125
MDA-MB-231	24.3845	0.449238	22	18	1553.28	0.284353
MDA-MB-231	21.1703	0.349282	12	7.5	2275.45	0.211478
MDA-MB-231	21.851	0.455327	11	16.5	5234.11	0.0468652
MDA-MB-231	22.4545	0.390253	390.5	341.5	4944.48	0.137706
MDA-MB-231	23.8566	0.442862	11	15	196.936	0.743094
MDA-MB-231	18.2992	0.270305	9.5	3	312.613	0.551805
MDA-MB-231	23.8566	0.408479	78	75.5	3186.27	0.174892
MDA-MB-231	23.48	0.425738	27	22	1111.82	0.388004
MDA-MB-231	24.7987	0.607	18.5	19	1443.99	0.223466
MDA-MB-231	26.2454	0.467848	9	8.5	1044.31	0.303224
MDA-MB-231	18.8138	0.275185	7.5	2.5	1007.68	0.336762
MDA-MB-231	24.4887	0.375577	6.5	4.5	124.565	0.693275
MDA-MB-231	22.9868	0.401063	21	9.5	1024.52	0.338414
MDA-MB-231	18.78	0.293699	4.5	2	116.53	0.666447
MDA-MB-231	24.4106	0.557046	18	18	1086.84	0.308667
MDA-MB-231	22.2837	0.516115	17.5	13.5	966.818	0.328867
MDA-MB-231	18.6439	0.470812	9	2.5	42.7104	0.768452
MDA-MB-231	30.2355	0.517597	6.5	5	444.884	0.409235
MDA-MB-231	24.122	0.524577	12	12	1252.82	0.255131
MDA-MB-231	25.1302	0.530164	6	4.5	173.969	0.569098
MDA-MB-231	20.3421	0.489207	4.5	2	295.76	0.426668
MDA-MB-231	24.6183	0.523001	27	20.5	930.824	0.362985
MDA-MB-231	25.5074	0.48887	13	15	1428.02	0.27983
MDA-MB-231	21.9672	0.369659	11.5	7	1363.61	0.285899
MDA-MB-231	19.6416	0.341587	7.5	3.5	25.3396	0.972646
MDA-MB-231	24.3322	0.434735	19.5	19.5	1673.93	0.26925
MDA-MB-231	16.2737	0.256262	9	2	1223.21	0.305324
MDA-MB-231	19.8992	0.40762	3.5	2.5	322.326	0.464928
MDA-MB-231	20.4046	0.337051	7	3	320.082	0.507679
MDA-MB-231	20.1851	0.404056	13.5	9.5	607.876	0.462684
MDA-MB-231	21.9382	0.405968	14	8.5	755.321	0.408976
MDA-MB-231	19.3805	0.394734	25.5	17.5	1386.75	0.350055
MDA-MB-231	24.2536	0.455195	44.5	44.5	2357.68	0.224822
MDA-MB-231	22.5111	0.415138	54	44.5	2356.73	0.243132
MDA-MB-231	23.8032	0.444422	104	83	2821.03	0.210547
MDA-MB-231	22.9036	0.476399	12	10.5	431.493	0.507394
MDA-MB-231	27.9146	0.471258	7.5	6	657.64	0.371233
MDA-MB-231	26.5589	0.418674	15.5	10	2173.99	0.200775
MDA-MB-231	20.7143	0.301892	4	2	41.1606	0.816266
MDA-MB-231	19.9631	0.33858	5.5	2	25.7808	0.881277
MDA-MB-231	21.2003	0.300034	5.5	2.5	213.946	0.568007
MDA-MB-231	20.9283	0.307115	5.5	4	286.615	0.585232
MDA-MB-231	20.4046	0.375078	9	7	439.676	0.498949
MDA-MB-231	13.3034	0.266983	159.5	98	4133.84	0.164477
MDA-MB-231	19.4788	0.30711	13.5	10.5	1655.32	0.308427
MDA-MB-231	18.746	0.315287	6.5	3.5	314.588	0.535892
MDA-MB-231	20.4046	0.384968	22.5	18.5	1758.52	0.28592
MDA-MB-231	17.4078	0.232044	4.5	2	269.958	0.576426
MDA-MB-231	21.3499	0.388687	27	16.5	1621.91	0.297201
MDA-MB-231	13.0619	0.326303	10	5.5	125.625	0.7445
MDA-MB-231	18.5755	0.624829	6.5	3	1137.09	0.180017
MDA-MB-231	18.9151	0.312154	48.5	33.5	1386.91	0.331247
MDA-MB-231	20.4669	0.375313	13.5	8	1059.52	0.342995
MDA-MB-231	17.1127	0.395476	15.5	20	704.098	0.585592
MDA-MB-231	19.7063	0.353157	17.5	9	1688.27	0.274362
MDA-MB-231	18.678	0.315737	3.5	2.5	152.518	0.627075
MDA-MB-231	23.0698	0.456363	18.5	17.5	1493.76	0.276068
MDA-MB-231	19.8351	0.337138	22.5	8	1055.07	0.366058
MDA-MB-231	17.7339	0.293764	5.5	2	360.213	0.473128
MDA-MB-231	18.4379	0.312702	4	2	48.4941	0.801173
MDA-MB-231	13.7736	0.449593	11.5	8.5	340.315	0.54861
MDA-MB-231	13.8658	0.443095	90	77	2865.28	0.199477
MDA-MB-231	13.9116	0.364551	28.5	21.5	1865.79	0.301975
MDA-MB-231	21.0496	0.389467	52	35.5	3184.8	0.175595
MDA-MB-231	16.888	0.303575	15	4	536.074	0.465307
MDA-MB-231	12.1005	0.488093	64	43.5	3526.94	0.0753243
MDA-MB-231	25.8051	0.464715	16.5	21.5	1310.83	0.323043
MDA-MB-231	26.8213	0.422922	8	6.5	629.761	0.408245
MDA-MB-231	23.5612	0.437106	27.5	27	2205.71	0.232562
MDA-MB-231	23.8299	0.459681	21	28	2087.91	0.218017
MDA-MB-231	19.2818	0.333363	7	3	356.875	0.491265
MDA-MB-231	21.4985	0.393313	11.5	9.5	954.455	0.381156
MDA-MB-231	19.0158	0.319956	4	2	973.145	0.311039
MDA-MB-231	18.5068	0.333061	8.5	2	309.126	0.489003
MDA-MB-231	27.2685	0.502079	12.5	13.5	1563.22	0.24672
MDA-MB-231	20.2166	0.403325	10	5	28.5377	0.966827
MDA-MB-231	21.2003	0.416373	19	13	1322.52	0.303197
MDA-MB-231	20.6219	0.469317	7.5	11	667.438	0.406483
MDA-MB-231	23.5071	0.447485	35	35.5	2526.56	0.192784
MDA-MB-231	13.0619	0.406764	6.5	3.5	712.992	0.348773
MDA-MB-231	30.13	0.485962	8.5	16.5	1965.33	0.198721
MDA-MB-231	22.8201	0.472727	23.5	30.5	1833.22	0.26525
MDA-MB-231	22.5676	0.450156	20.5	22.5	1304.42	0.322675
MDA-MB-231	21.9092	0.429378	9.5	7.5	724.949	0.393627
MDA-MB-231	20.9587	0.395009	4.5	3	128.58	0.62922
MDA-MB-231	17.0755	0.393726	3	2	115.901	0.61445
MDA-MB-231	21.851	0.517155	2.5	8	2487.86	0.255866
MDA-MB-231	21.9382	0.430644	4.5	3	572.387	0.37296
MDA-MB-231	19.0826	0.388916	10	4.5	205.966	0.596083
MDA-MB-231	21.6461	0.428716	11	5.5	182.023	0.621928
MDA-MB-231	22.9868	0.471454	12	11.5	475.662	0.487229
MDA-MB-231	18.9487	0.390764	18	8	923.825	0.374525
MDA-MB-231	19.8992	0.446135	445	361	4478.26	0.143797
MDA-MB-231	21.2902	0.469362	18	16	2130.28	0.1873
MDA-MB-231	21.4985	0.476064	25	29.5	2300.94	0.197788
MDA-MB-231	19.0492	0.382105	16	9	1279.06	0.315667
MDA-MB-231	28.4343	0.467656	20.5	20.5	2962.58	0.136999
MDA-MB-231	15.5945	0.388748	7.5	4	1530.8	0.23566
MDA-MB-231	22.4261	0.405195	10	5	886.827	0.339027
MDA-MB-231	25.0541	0.49311	5.5	3.5	251.327	0.48844
MDA-MB-231	17.9834	0.421107	6.5	5	209.847	0.591288
MDA-MB-231	19.2156	0.373862	5.5	2.5	54.8412	0.769881
MDA-MB-231	18.9151	0.42597	23	31.5	2932.63	0.175252
MDA-MB-231	24.8756	0.480345	4.5	5.5	79.3876	0.766122
MDA-MB-231	19.7063	0.409979	3	2.5	45.9016	0.785372
MDA-MB-231	19.1824	0.320632	41	41.5	1619.46	0.429531
MDA-MB-231	18.1245	0.25041	5	2.5	773.413	0.391805
MDA-MB-231	19.7063	0.292204	5.5	3.5	196.983	0.630735
MDA-MB-231	19.2156	0.275065	2.5	2	44.815	0.810194
MDA-MB-231	18.8138	0.262787	4	2	297.183	0.52625
MDA-MB-231	16.1559	0.308243	6	11.5	7580.2	0.0471963
MDA-MB-231	18.678	0.228487	5.5	3.5	1371.2	0.330954
MDA-MB-231	21.0799	0.316131	47	40.5	3498.01	0.213455
MDA-MB-231	24.1747	0.397166	62.5	51	2439.43	0.264568
MDA-MB-231	18.2644	0.238613	8	4	777.931	0.424633
MDA-MB-231	9.77205	0.414944	44	45	2922.16	0.180766
MDA-MB-231	20.9587	0.358509	18.5	10.5	473.124	0.549746
MDA-MB-231	20.4669	0.198779	4	2	887.66	0.391634
MDA-MB-231	15.3061	0.562098	6	3	967.662	0.204907
MDA-MB-231	11.9416	0.288691	7	5.5	2595.85	0.184974
MDA-MB-231	20.1851	0.329096	15.5	14	1259.45	0.378793
MDA-MB-231	19.8351	0.436026	9.5	7.5	1531.49	0.234583
MDA-MB-231	17.7339	0.267431	21.5	15.5	342.95	0.761628
MDA-MB-231	19.6091	0.330175	6.5	4.5	1467.21	0.272753
MDA-MB-231	7.73578	0.303142	13.5	8	589.353	0.507401
MDA-MB-231	19.5441	0.309089	9.5	7	2230.86	0.242192
MDA-MB-231	15.9577	0.200563	5.5	3	352.913	0.56386
MDA-MB-231	20.8369	0.322464	6.5	3.5	1038.7	0.327004
MDA-MB-231	20.6219	0.339194	4.5	3.5	535.99	0.422047
MDA-MB-231	22.7082	0.366168	8.5	8	1056.3	0.343582
MDA-MB-231	26.4388	0.606055	45.5	40	2443.28	0.127067
MDA-MB-231	19.1492	0.276446	5	2	1859.19	0.215569
MDA-MB-231	18.3687	0.293008	1.5	3	482.41	0.357246
MDA-MB-231	20.5291	0.315234	4.5	2.5	180.96	0.592155
MDA-MB-231	24.3845	0.428518	51	44	2449.07	0.252394
MDA-MB-231	18.7121	0.267498	4.5	2	532.488	0.452359
MDA-MB-231	19.7063	0.361892	51.5	48.5	2271.68	0.320676
MDA-MB-231	20.248	0.386574	2.5	2.5	117.736	0.634952
MDA-MB-231	16.7746	0.663803	2.5	2	407.2	0.396211
MDA-MB-231	18.678	0.248693	10.5	4.5	784.378	0.438384
MDA-MB-231	18.6097	0.424304	5.5	11	254.008	0.739613
MDA-MB-231	21.2003	0.499205	3.5	2	143.531	0.532981
MDA-MB-231	19.4461	0.261022	5.5	2.5	763.055	0.388636
MDA-MB-231	18.6439	0.212912	4.5	2	1617.08	0.288796
MDA-MB-231	22.5394	0.377052	29	23.5	1711.1	0.309403
MDA-MB-231	20.3421	0.299523	19.5	12.5	2428.97	0.249486
MDA-MB-231	22.0828	0.471998	15.5	17	1329.04	0.325794
MDA-MB-231	18.9151	0.292541	13.5	6	481.511	0.535455
MDA-MB-231	18.4033	0.306672	3.5	2	36.7118	0.840921
MDA-MB-231	18.746	0.31925	5.5	2	21.716	0.922795
MDA-MB-231	19.9949	0.177189	16	2.5	805.532	0.296824
MDA-MB-231	18.5412	0.305288	7	2.5	190.493	0.60349
MDA-MB-231	26.8213	0.444553	13	2	60.5172	0.680213
MDA-MB-231	25.6318	0.440504	59	53	2603.16	0.205443
MDA-MB-231	22.8479	0.380442	92	99	3116.55	0.271658
MDA-MB-231	20.1535	0.364854	4.5	4.5	284.78	0.549957
MDA-MB-231	18.8814	0.308485	4	2.5	102.139	0.691352
MDA-MB-231	28.0511	0.274545	4.5	2.5	2341.67	0.195751
MDA-MB-231	24.4366	0.426431	21	22.5	1612.18	0.300272
MDA-MB-231	19.9631	0.324242	7	3.5	153.423	0.657738
MDA-MB-231	20.498	0.344959	9.5	4	279.895	0.553195
MDA-MB-231	21.0194	0.380785	18.5	17	1611.02	0.309615
MDA-MB-231	22.5111	0.440747	12	14	1956.73	0.211748
MDA-MB-231	19.0826	0.304635	7	3.5	496.164	0.458636
MDA-MB-231	18.6097	0.297225	3.5	2.5	134.982	0.656795
MDA-MB-231	20.0267	0.337814	4	2.5	106.268	0.664911
MDA-MB-231	18.678	0.411085	37	8.5	98.6874	0.817188
MDA-MB-231	19.5115	0.416344	7.5	14	3234.32	0.159203
MDA-MB-231	18.5068	0.507334	4	10	241.931	0.682727
MDA-MB-231	16.9257	0.330428	10	3.5	321.892	0.513688
MDA-MB-231	21.11	0.399853	8.5	6.5	745.497	0.384118
MDA-MB-231	23.5612	0.44061	30.5	32	1934.58	0.267594
MDA-MB-231	25.2565	0.417441	10	11.5	1579.23	0.253088
MDA-MB-231	20.4358	0.358354	5.5	3.5	360.396	0.48969
MDA-MB-231	20.9891	0.355365	5.5	2.5	321.49	0.475755
MDA-MB-231	20.0585	0.426948	10.5	10	1516.13	0.259737
MDA-MB-231	20.1219	0.31319	8.5	4	477.827	0.47843
MDA-MB-231	18.9823	0.248018	9	4.5	746.336	0.442274
MDA-MB-231	17.7339	0.212026	7	2.5	1649.75	0.306189
MDA-MB-231	19.4134	0.285207	6	2.5	581.179	0.42104
MDA-MB-231	18.4379	0.214645	4.5	2	159.159	0.66461
MDA-MB-231	21.4985	0.333233	17	9	1121.41	0.360697
MDA-MB-231	22.7921	0.352694	37	29	1960.43	0.318804
MDA-MB-231	19.0826	0.263625	8	3.5	195.567	0.661687
MDA-MB-231	22.4828	0.378136	20	16	1650.65	0.30334
MDA-MB-231	18.678	0.260399	8	13	595.642	0.573098
MDA-MB-231	14.1835	0.415903	7.5	5	245.653	0.558319
MDA-MB-231	21.8801	0.372301	16.5	14	1282.47	0.3537
MDA-MB-231	19.1492	0.289369	4.5	2	228.692	0.544163
MDA-MB-231	13.7736	0.325429	6.5	3.5	312.341	0.526635
MDA-MB-231	12.1005	0.337877	28	11	241.063	0.712104
MDA-MB-231	13.5406	0.433653	6.5	4.5	398.1	0.457936
MDA-MB-231	13.3512	0.340988	19	10	1102.48	0.384506
MDA-MB-231	20.2166	0.297222	14	8.5	827.299	0.458494
MDA-MB-231	12.8655	0.451337	52.5	36.5	2307.57	0.264517
MDA-MB-231	19.1492	0.252007	7	2	1780.11	0.248264
MDA-MB-231	13.3512	0.384052	8.5	4.5	317.029	0.521541
MDA-MB-231	19.3805	0.320853	118.5	76.5	2800.96	0.337015
MDA-MB-231	12.7662	0.302744	64.5	48	3333.09	0.257657
MDA-MB-231	20.7757	0.269942	5	2.5	487.372	0.45937
MDA-MB-231	19.803	0.229808	6.5	2.5	389.574	0.520827
MDA-MB-231	13.6343	0.489274	181.5	170.5	3461.96	0.167842
MDA-MB-231	19.0158	0.271308	14	3.5	601.307	0.443678
MDA-MB-231	20.6835	0.342697	26	16	1405.1	0.354002
MDA-MB-231	19.1492	0.294022	11.5	4	742.245	0.402925
MDA-MB-231	20.8979	0.388577	69	41	711.05	0.62569
MDA-MB-231	24.0956	0.399991	283.5	246	4094.34	0.193832
MDA-MB-231	19.4134	0.305787	5	2	120.351	0.646933
MDA-MB-231	18.8814	0.274423	2	7	275.672	0.703875
MDA-MB-231	22.9591	0.546057	26.5	23.5	1773.78	0.198536
MDA-MB-231	22.6239	0.391394	15.5	9	986.501	0.343389
MDA-MB-231	19.6416	0.301349	3.5	2.5	958.54	0.375198
MDA-MB-231	24.2536	0.389375	20	16.5	2270.31	0.210294
MDA-MB-231	23.696	0.388801	12	10.5	1211.57	0.323105
MDA-MB-231	24.306	0.402139	10	8	904.332	0.359177
MDA-MB-231	22.4545	0.361624	9.5	6	732.592	0.406122
MDA-MB-231	20.3421	0.325112	8	2	104.315	0.662572
MDA-MB-231	21.9672	0.328634	10	7.5	1438.23	0.307573
MDA-MB-231	20.9587	0.321037	5.5	2.5	673.999	0.379583
MDA-MB-231	20.498	0.315758	4	2	384.473	0.453791
MDA-MB-231	11.8345	0.445864	145.5	154	4103.88	0.108327
MDA-MB-231	22.5394	0.408387	6	4	60.0086	0.787977
MDA-MB-231	21.2902	0.356624	7	3	535.138	0.415178
MDA-MB-231	27.0105	0.461367	10.5	13.5	1421.06	0.272918
MDA-MB-231	18.4033	0.321853	20	8	654.76	0.474735
MDA-MB-231	19.4788	0.351243	6	2.5	174.345	0.589786
MDA-MB-231	20.8979	0.408684	11	8	600.69	0.448382
MDA-MB-231	20.8674	0.399141	14.5	10	300.963	0.614448
MDA-MB-231	22.1691	0.401593	10.5	5	408.201	0.477075
MDA-MB-231	18.2644	0.342299	16.5	9	82.0258	0.91569
MDA-MB-231	21.9962	0.378963	10.5	6.5	583.415	0.451524
MDA-MB-231	24.0692	0.417212	12.5	15.5	2299.33	0.189312
MDA-MB-231	19.6091	0.293583	39	10	1911.19	0.279198
MDA-MB-231	25.2817	0.607252	49.5	2	13.0836	0.898005
MDA-MB-231	19.5115	0.298081	11.5	3.5	174.434	0.647064
MDA-MB-231	22.1691	0.410589	9	5.5	531.696	0.438016
MDA-MB-231	20.1535	0.339773	40.5	27.5	2147.72	0.304801
MDA-MB-231	22.3692	0.45834	11.5	16.5	535.273	0.542232
MDA-MB-231	20.591	0.361926	9.5	5	346.604	0.52824
MDA-MB-231	24.201	0.475407	7.5	8.5	308.755	0.554114
MDA-MB-231	21.0194	0.29374	10.5	5	1130.18	0.360502
MDA-MB-231	30.3616	0.472485	27.5	30	1379.98	0.369867
MDA-MB-468	19.2487	0.2657	10	3.5	785.363	0.41048
MDA-MB-468	21.4985	0.316155	1837.5	1829	10026.8	0.326339
MDA-MB-468	22.7082	0.350665	44	44	2310.17	0.321441
MDA-MB-468	21.1703	0.318491	97.5	86	3402.5	0.288748
MDA-MB-468	17.6979	0.204499	13	4	1342.96	0.370611
MDA-MB-468	19.8992	0.283081	29	22	2601.38	0.289019
MDA-MB-468	20.6835	0.31925	319.5	297	4983.29	0.306383
MDA-MB-468	18.6439	0.206292	25.5	17	1996.03	0.376053
MDA-MB-468	19.2818	0.255879	19	14.5	1504.96	0.403282
MDA-MB-468	19.7708	0.277048	65	49.5	1943.81	0.471543
MDA-MB-468	15.8376	0.201016	13	2.5	303.311	0.597585
MDA-MB-468	19.5441	0.285581	11	12	2403.32	0.257644
MDA-MB-468	20.3421	0.272151	62	56	3619.18	0.294501
MDA-MB-468	24.7473	0.426056	18	10	1834.55	0.190243
MDA-MB-468	19.1492	0.243866	351.5	300	7186.31	0.405467
MDA-MB-468	12.4122	0.249151	29	24	2627.7	0.300897
MDA-MB-468	18.5755	0.165976	191.5	37.5	10264	0.0769776
MDA-MB-468	20.6219	0.329376	151	134.5	4991.93	0.232638
MDA-MB-468	13.5406	0.307685	137.5	125	4206.45	0.272459
MDA-MB-468	18.78	0.387214	28.5	27.5	2275.83	0.231728
MDA-MB-468	18.4379	0.257398	9.5	7.5	595.3	0.539604
MDA-MB-468	16.1165	0.33434	14	10.5	1745	0.285729
MDA-MB-468	17.7339	0.199118	10	5.5	1452.01	0.381829
MDA-MB-468	18.9487	0.258578	14.5	11.5	1287.1	0.430071
MDA-MB-468	12.8655	0.25017	35	26	2696.97	0.354156
MDA-MB-468	23.3168	0.345006	9	7.5	436.407	0.521931
MDA-MB-468	22.3123	0.352549	5	3.5	1978.73	0.196694
MDA-MB-468	20.1219	0.299708	267.5	256.5	5003.57	0.330767
MDA-MB-468	18.0893	0.215382	44.5	25	1955.43	0.461228
MDA-MB-468	17.7697	0.2195	13.5	5.5	1185.26	0.425996
MDA-MB-468	18.9151	0.253738	11.5	6	717.885	0.493605
MDA-MB-468	18.0893	0.201244	12.5	5.5	1098.23	0.438216
MDA-MB-468	17.7339	0.249969	23.5	13.5	1351.69	0.43855
MDA-MB-468	19.0158	0.291649	46	33	2889.26	0.283799
MDA-MB-468	18.0893	0.215318	29.5	8.5	2012.11	0.312836
MDA-MB-468	20.3734	0.28393	24	17	2772.12	0.242245
MDA-MB-468	19.4134	0.221753	131.5	113	5775.12	0.289927
MDA-MB-468	21.0799	0.273945	76.5	62.5	3572.73	0.297441
MDA-MB-468	18.8476	0.211482	9	5	2028.05	0.321425
MDA-MB-468	22.2837	0.295027	34.5	39.5	3620.52	0.251382
MDA-MB-468	19.7708	0.44983	41	40.5	497.996	0.706215
MDA-MB-468	21.2603	0.28	8	3.5	215.84	0.618077
MDA-MB-468	23.7764	0.379022	112	101	3682.98	0.215411
MDA-MB-468	13.1106	0.310018	7	3.5	527.978	0.454986
MDA-MB-468	19.5441	0.296423	40.5	23.5	1831.6	0.374303
MDA-MB-468	17.4078	0.243305	16	4.5	429.644	0.555092
MDA-MB-468	13.6343	0.272805	16	6	692.139	0.459484
MDA-MB-468	13.4462	0.242328	20.5	7	1116.92	0.400485
MDA-MB-468	20.4358	0.322967	16	9	829.37	0.451682
MDA-MB-468	30.1512	0.316197	13.5	12.5	372.543	0.666832
MDA-MB-468	26.7738	0.438782	21	26	612.498	0.558365
MDA-MB-468	18.6097	0.265213	54	31	2328.81	0.353654
MDA-MB-468	21.11	0.359371	11	5.5	757.923	0.407722
MDA-MB-468	20.8063	0.315691	14	9	949.637	0.424644
MDA-MB-468	20.3734	0.309679	51.5	40	2500.58	0.334767
MDA-MB-468	22.2837	0.294911	78.5	65	2991.68	0.354798
MDA-MB-468	20.3421	0.333221	22	15	1221.08	0.407416
MDA-MB-468	18.2295	0.306009	29	13.5	1239.14	0.401367
MDA-MB-468	19.116	0.293003	16.5	8	735.68	0.462269
MDA-MB-468	22.1116	0.381438	37.5	32	2248.77	0.276739
MDA-MB-468	22.9591	0.350459	8	6	705.645	0.430533
MDA-MB-468	19.4461	0.285615	12	4.5	829.527	0.400807
MDA-MB-468	21.0496	0.348881	169.5	151.5	3449.87	0.312448
MDA-MB-468	18.9823	0.289029	29.5	21	1376.51	0.452732
MDA-MB-468	23.0973	0.391626	7.5	5.5	325.698	0.541229
MDA-MB-468	18.3687	0.239861	12.5	2.5	120.532	0.721154
MDA-MB-468	26.6546	0.42624	36	35.5	2288.06	0.252562
MDA-MB-468	21.9962	0.332584	75.5	64.5	4197.39	0.149562
MDA-MB-468	22.3408	0.355229	188.5	186	4137.33	0.287177
MDA-MB-468	18.5755	0.297833	82.5	72.5	3409.2	0.276133
MDA-MB-468	19.2487	0.203508	28.5	9.5	1571.59	0.409377
MDA-MB-468	22.7362	0.311753	24	15	554.491	0.63705
MDA-MB-468	24.5666	0.376495	20	12	560.622	0.529143
MDA-MB-468	23.3986	0.351747	23.5	16.5	498.867	0.610187
MDA-MB-468	20.248	0.247867	400.5	333.5	6551.74	0.327037
MDA-MB-468	25.2565	0.366208	17	10.5	122.172	0.845506
MDA-MB-468	24.5406	0.361069	187.5	173.5	2993.74	0.405605
MDA-MB-468	21.7634	0.297222	55.5	38	2936.35	0.27466
MDA-MB-468	21.7341	0.328171	67.5	47.5	2787.14	0.28299
MDA-MB-468	21.8801	0.2966	84.5	69	1185.23	0.651533
MDA-MB-468	21.0496	0.265448	16.5	11	965.124	0.492845
MDA-MB-468	19.7708	0.272302	28	12.5	1960.07	0.331641
MDA-MB-468	18.4379	0.257485	92.5	58.5	4468.86	0.280834
MDA-MB-468	20.9283	0.267469	32.5	26	3351	0.240933
MDA-MB-468	12.8655	0.220864	8.5	4	438.055	0.567615
MDA-MB-468	14.1835	0.245357	60	45.5	3063.44	0.365542
MDA-MB-468	14.1835	0.319059	76	43	1309.96	0.541326
MDA-MB-468	12.9149	0.333033	69	54.5	2567.8	0.322175
MDA-MB-468	22.3123	0.358533	139	124.5	4116.36	0.193929
MDA-MB-468	18.2644	0.198349	86	58.5	4162.75	0.36779
MDA-MB-468	15.5945	0.3974	70	70.5	2991.19	0.230594
MDA-MB-468	20.8369	0.342931	265	239.5	5211.49	0.252564
MDA-MB-468	15.0545	0.30515	73	56.5	2415.43	0.3983
MDA-MB-468	20.4046	0.358494	252.5	225.5	4373.5	0.232222
MDA-MB-468	21.4689	0.369696	61	51.5	3053.92	0.216024
MDA-MB-468	21.11	0.32317	1111	1052	7244.86	0.377356
MDA-MB-468	20.0267	0.292725	10.5	5.5	826.136	0.413182
MDA-MB-468	20.7143	0.328228	19.5	10	1699.52	0.301557
MDA-MB-468	26.3906	0.202566	18	9	758.143	0.553207
MDA-MB-468	27.0811	0.223197	4	2	219.173	0.604569
MDA-MB-468	20.4046	0.288053	144.5	119	4928.31	0.194387
MDA-MB-468	18.9823	0.273813	27	8	1155.07	0.403706
MDA-MB-468	16.1953	0.260059	47.5	29.5	6682.52	0.133598
MDA-MB-468	26.5589	0.259706	11	4.5	703.394	0.459056
MDA-MB-468	20.9891	0.379422	55	47	1905.13	0.365289
MDA-MB-468	20.5291	0.354739	24.5	15.5	1377.43	0.349623
MDA-MB-468	22.3692	0.341534	172	157	4350.77	0.247027
MDA-MB-468	21.0194	0.305813	97	73.5	3834.41	0.2418
MDA-MB-468	19.8992	0.289363	375.5	265	6003.01	0.265023
MDA-MB-468	19.3147	0.269257	7.5	2.5	152.718	0.658904
MDA-MB-468	19.3477	0.236328	16	6.5	1723.22	0.329625
MDA-MB-468	21.0799	0.518323	12.5	10	112.407	0.788263
MDA-MB-468	15.2227	0.256347	13	4.5	714.032	0.448549
MDA-MB-468	14.6255	0.256347	17	8	1008.82	0.423186
MDA-MB-468	14.3619	0.240645	10.5	2	235.606	0.587018
MDA-MB-468	13.4935	0.280768	11	4	491.415	0.502487
MDA-MB-468	14.0482	0.309992	12.5	7	912.081	0.406074
MDA-MB-468	20.6219	0.33067	22.5	14	1792.62	0.307442
MDA-MB-468	19.0826	0.459764	18.5	4	187.545	0.577548
MDA-MB-468	20.4358	0.472958	15	6	581.681	0.393438
MDA-MB-468	14.2283	0.480601	9.5	6.5	680.244	0.363726
MDA-MB-468	15.0545	0.463442	9	3.5	156.965	0.585614
MDA-MB-468	23.2895	0.478834	5	3	75.9242	0.692339
MDA-MB-468	14.5819	0.435193	5.5	2.5	72.3788	0.689698
MDA-MB-468	20.498	0.415272	144.5	119.5	2922.02	0.300904
MDA-MB-468	20.7757	0.488833	29	13.5	944.502	0.357718
MDA-MB-468	18.6439	0.43677	76.5	30.5	1630.67	0.318821
MDA-MB-468	27.6165	0.444181	12	4.5	240.384	0.553866
MDA-MB-468	21.2003	0.480092	68.5	52.5	1819.25	0.315831
MDA-MB-468	20.745	0.425474	4.5	2.5	72.4268	0.691757
MDA-MB-468	19.2818	0.470012	10.5	3.5	131.855	0.621354
MDA-MB-468	21.2603	0.483997	20	10.5	917.024	0.340479
MDA-MB-468	15.6353	0.493068	353	314.5	3774.88	0.176112
MDA-MB-468	22.2837	0.479779	67.5	58.5	2369.79	0.223475
MDA-MB-468	15.389	0.608343	24	29	6796.43	0.0913585
MDA-MB-468	21.3797	0.339774	90	72.5	3228.72	0.261503
MDA-MB-468	24.122	0.41	42	34.5	2167.63	0.270846
MDA-MB-468	14.8843	0.336739	25.5	14.5	2636.77	0.206539
MDA-MB-468	21.2902	0.33026	12	5.5	1628.56	0.2727
MDA-MB-468	21.4392	0.355134	37	23	441.547	0.68449
MDA-MB-468	22.7082	0.361834	133.5	123.5	4284.97	0.208103
MDA-MB-468	18.8814	0.288793	13	10.5	1235.47	0.399073
MDA-MB-468	18.746	0.293731	18.5	9	1741.88	0.30898
MDA-MB-468	24.9522	0.375337	29	22.5	1360.94	0.384146
MDA-MB-468	24.2798	0.446463	14.5	13.5	2429.16	0.189651
MDA-MB-468	21.5577	0.305113	10.5	6	1513.86	0.29372
MDA-MB-468	21.9382	0.32895	26.5	16	1006.56	0.451471
MDA-MB-468	20.5291	0.274318	7	3.5	669.911	0.423714
MDA-MB-468	22.7362	0.369317	12	4.5	1423.37	0.264002
MDA-MB-468	26.5829	0.409413	23	25.5	1044.87	0.438024
MDA-MB-468	19.5115	0.238942	11.5	2.5	989.281	0.37504
MDA-MB-468	20.4358	0.287167	23.5	9.5	1460.98	0.353664
MDA-MB-468	24.0692	0.378594	24	21.5	2112.65	0.259039
MDA-MB-468	25.0541	0.392803	16.5	11.5	2385.44	0.19335
MDA-MB-468	20.8369	0.290832	22.5	10.5	1412.34	0.365301
MDA-MB-468	12.8655	0.324061	234	186.5	4869.2	0.180334
MDA-MB-468	21.2902	0.349254	18.5	17	2596.62	0.194227
MDA-MB-468	20.6527	0.305564	252	229.5	5518.97	0.247246
MDA-MB-468	19.674	0.300077	36	21.5	1872.75	0.38032
MDA-MB-468	21.4392	0.378486	136.5	93	4498.42	0.12792
MDA-MB-468	18.2992	0.206358	9	5	864.53	0.455953
MDA-MB-468	17.5897	0.241406	7	4.5	499.023	0.547177
MDA-MB-468	20.9891	0.322503	475	453	6284.71	0.1598
MDA-MB-468	17.3712	0.243653	3.5	2	120.964	0.687155
MDA-MB-468	17.8769	0.28493	20	17	7391.65	0.0300686
MDA-MB-468	18.1595	0.222667	137.5	64.5	4375.74	0.34193
MDA-MB-468	24.3584	0.259381	36.5	5.5	7130.3	0.0799842
MDA-MB-468	22.3977	0.344906	216	198	5376.45	0.204336
MDA-MB-468	16.0373	0.194756	17.5	9.5	1762.7	0.405138
MDA-MB-468	13.5875	0.312843	343	280	6496.32	0.173551
MDA-MB-468	18.6439	0.26445	8	4	356.209	0.573448
MDA-MB-468	17.9125	0.241425	27	6	1296.82	0.387238
MDA-MB-468	13.7273	0.268848	60.5	38.5	3019.94	0.330926
MDA-MB-468	13.5406	0.279277	69.5	41.5	2883.25	0.313452
MDA-MB-468	19.5766	0.294508	66.5	51.5	3767.88	0.247708
MDA-MB-468	13.6343	0.317312	80.5	58	3106.67	0.266222
MDA-MB-468	18.1245	0.226057	5	2.5	358.045	0.54498
MDA-MB-468	17.1499	0.248017	6.5	2	39.131	0.852563
MDA-MB-468	19.7386	0.292194	8	2.5	440.199	0.473314
MDA-MB-468	19.674	0.334833	148.5	113	4009.29	0.285647
MDA-MB-468	27.8917	0.228845	15.5	2.5	5669.55	0.0900811
MDA-MB-468	21.11	0.337277	18.5	13.5	1378.33	0.348796
MDA-MB-468	19.1824	0.319314	13.5	6.5	1001.73	0.392968
MDA-MB-468	19.1824	0.271146	113	88	3434.34	0.385873
MDA-MB-468	21.3201	0.378523	77	61.5	1614.28	0.462483
MDA-MB-468	18.334	0.228933	21.5	7.5	2181.27	0.3027
MDA-MB-468	21.6461	0.409042	93.5	85.5	3347.75	0.262046
MDA-MB-468	19.1492	0.258607	86.5	65	1420.95	0.644866
MDA-MB-468	19.7708	0.233283	21	19	2307.38	0.366316
MDA-MB-468	19.4788	0.242825	85.5	55	4078.2	0.248923
MDA-MB-468	18.4033	0.353367	6	10.5	3709.69	0.142094
MDA-MB-468	31.3316	0.338677	92	67.5	3911.43	0.203606
MDA-MB-468	18.4724	0.241215	20	10.5	3049.95	0.24106
MDA-MB-468	31.0458	0.302921	9.5	3	2877.14	0.171036
MDA-MB-468	26.4388	0.221065	12	5.5	766.12	0.486666
MDA-MB-468	17.2609	0.209222	8	2	821.923	0.415653
MDA-MB-468	25.1049	0.417383	16.5	12	640.535	0.471884
MDA-MB-468	17.4443	0.192653	14	3	495.963	0.52872
MDA-MB-468	19.3477	0.236159	42	27	3509.89	0.266205
MDA-MB-468	19.1824	0.335997	7.5	6	2053.7	0.266365
MDA-MB-468	18.2644	0.244246	68.5	43.5	3238.97	0.331139
MDA-MB-468	19.0158	0.211803	51.5	35.5	3457.43	0.330384
MDA-MB-468	18.6439	0.224141	12	5.5	1461.73	0.372902
MDA-MB-468	17.3345	0.196217	14	5	1515.83	0.372234
MDA-MB-468	22.8201	0.389111	9	6.5	2958.95	0.133761
MDA-MB-468	19.9631	0.28133	158	117.5	3047.63	0.434186
MDA-MB-468	19.6091	0.275638	148	122	4809.01	0.295834
MDA-MB-468	17.9834	0.217603	8.5	2.5	667.139	0.428724
MDA-MB-468	13.2073	0.306571	42	22	1446.61	0.410868
MDA-MB-468	19.0492	0.239693	121.5	102	5144.39	0.285107
MDA-MB-468	18.5755	0.254033	20	12	1730.01	0.379074
MDA-MB-468	19.116	0.253542	48	32.5	2450.17	0.378942
MDA-MB-468	21.4095	0.452943	866	817.5	5678.83	0.115637
MDA-MB-468	14.3175	0.316549	22.5	16	2177.9	0.268562
MDA-MB-468	17.1499	0.199764	13	5	681.616	0.508573
MDA-MB-468	18.8814	0.212928	237.5	223.5	6095.89	0.444342
MDA-MB-468	18.5755	0.26606	7	3	1932.8	0.255893
MDA-MB-468	20.0585	0.280178	13	9.5	1456.21	0.373294
MDA-MB-468	18.3687	0.227997	14	5.5	1181.24	0.418669
MDA-MB-468	20.1535	0.288603	138.5	115	4121.33	0.314091
MDA-MB-468	20.8674	0.312779	21	15	2064.25	0.295867
MDA-MB-468	22.6239	0.378227	375.5	356	4848.63	0.288168
MDA-MB-468	17.1499	0.207393	10	2.5	101.442	0.775448
MDA-MB-468	19.0826	0.255083	29	18.5	2835.2	0.287527
MDA-MB-468	27.0105	0.410245	20	13.5	1169.68	0.39495
MDA-MB-468	23.8299	0.419089	7.5	6.5	755.857	0.363119
MDA-MB-468	19.1492	0.271732	9	4	368.872	0.554737
MDA-MB-468	29.6401	0.375573	185.5	178	5011.54	0.121164
MDA-MB-468	18.1245	0.341412	22.5	20.5	2878.97	0.202797
MDA-MB-468	21.7926	0.347547	87	68	2945.66	0.284482
MDA-MB-468	23.2621	0.389813	10.5	10	875.71	0.414097
MDA-MB-468	17.8055	0.189121	25.5	12	2093.34	0.369173
MDA-MB-468	19.4461	0.260696	113	71	3932.41	0.298678
MDA-MB-468	12.9149	0.226783	23.5	15	3101.25	0.268269
MDA-MB-468	16.3518	0.221704	9.5	3.5	1426.63	0.346421
MDA-MB-468	12.4634	0.579751	70	67	2752.05	0.192382
MDA-MB-468	13.8198	0.338795	30	21.5	1751.47	0.34475
MDA-MB-468	14.4062	0.37462	79.5	68	3873.65	0.143313
MDA-MB-468	13.4462	0.246821	10	6	796.735	0.449138
MDA-MB-468	14.7123	0.412732	472	468.5	4684.12	0.205217
MDA-MB-468	13.2555	0.328003	690	635	6278.63	0.27322
MDA-MB-468	25.3069	0.464537	722	726.5	4459.82	0.168713
MDA-MB-468	13.0619	0.316784	33	25.5	2317.68	0.293257
MDA-MB-468	17.3712	0.210223	5.5	2	78.5031	0.775628
MDA-MB-468	13.1106	0.312519	14	6.5	628.361	0.484857
MDA-MB-468	19.0158	0.47426	16	5	124.029	0.662605
MDA-MB-468	18.3687	0.509098	9	2.5	354.45	0.408426
MDA-MB-468	18.678	0.485623	21	11.5	755.008	0.38765
MDA-MB-468	17.4808	0.402702	8	2	373.343	0.422159
MDA-MB-468	23.1249	0.511244	3.5	2	17.4472	0.870796
MDA-MB-468	14.2283	0.513303	65.5	49.5	2066.74	0.24171
MDA-MB-468	12.8655	0.490881	14.5	9.5	1075.92	0.299805
MDA-MB-468	18.334	0.495087	20	6	248.146	0.551443
MDA-MB-468	17.0007	0.432403	9.5	4.5	715.439	0.383642
MDA-MB-468	20.0267	0.49525	9.5	5	715.472	0.329337
MDA-MB-468	13.7273	0.500056	178.5	152.5	3181.6	0.157198
MDA-MB-468	20.3421	0.313302	9.5	4.5	452.974	0.504993
MDA-MB-468	22.0828	0.355444	10.5	8.5	1077.99	0.368122
MDA-MB-468	20.1535	0.30019	12.5	8.5	1139.42	0.404947
MDA-MB-468	20.56	0.292315	25	20.5	2613.27	0.279317
MDA-MB-468	21.851	0.350638	90	80	3126.66	0.297803
MDA-MB-468	23.9631	0.393785	3.5	2.5	179.206	0.562384
MDA-MB-468	19.0492	0.259706	4	2	33.6269	0.880997
MDA-MB-468	20.3734	0.307459	5.5	3.5	408.731	0.501345
MDA-MB-468	21.0799	0.317657	16	13	1566.91	0.33921
MDA-MB-468	20.56	0.322999	19.5	12.5	1298.88	0.385817
MDA-MB-468	20.4669	0.292919	19.5	12.5	1113.21	0.440767
MDA-MB-468	22.3977	0.294911	6	2.5	788.05	0.375325
MDA-MB-468	19.0158	0.218675	8	2.5	1182.07	0.349196
MDA-MB-468	19.803	0.275302	12	7.5	1123.68	0.411041
MDA-MB-468	20.4669	0.295273	37.5	30	3000.73	0.26838
MDA-MB-468	19.674	0.3396	55	47	4853.7	0.136875
MDA-MB-468	18.7121	0.338448	29	16	2398.15	0.244057
MDA-MB-468	21.9092	0.408549	23.5	17.5	2262.99	0.20237
MDA-MB-468	23.2073	0.373258	19	15	333.715	0.677391
MDA-MB-468	18.0541	0.253612	15.5	6	761.929	0.460512
MDA-MB-468	22.7642	0.363876	26.5	19	301.599	0.748405
MDA-MB-468	24.1484	0.558255	11.5	13	372.918	0.528374
MDA-MB-468	23.2347	0.38073	24	15	851.56	0.454401
MDA-MB-468	21.4689	0.324759	158	145.5	4596.57	0.281762
MDA-MB-468	21.7926	0.318497	12	7.5	432.166	0.549745
MDA-MB-468	19.0826	0.223872	70.5	52.5	4487.04	0.279462
MDA-MB-468	28.8124	0.585201	4	8.5	1677.37	0.239549
MDA-MB-468	18.0188	0.190348	33.5	17.5	3862.33	0.243292
MDA-MB-468	20.498	0.280143	146.5	136.5	4625.62	0.322592
MDA-MB-468	23.48	0.413436	816	809.5	4851.25	0.367795
MDA-MB-468	13.159	0.293328	9	8	1211.34	0.359518
MDA-MB-468	19.8672	0.245034	38.5	33.5	2620.92	0.354306
MDA-MB-468	20.498	0.309748	68	55.5	2148.4	0.252248
MDA-MB-468	18.7121	0.242953	37.5	18	1728.53	0.413224
MDA-MB-468	20.8674	0.322431	155.5	138.5	3179.88	0.420965
MDA-MB-468	22.1404	0.329706	21.5	19	2302.38	0.267917
MDA-MB-468	19.4461	0.243255	24	17	1759.66	0.392865
MDA-MB-468	19.1824	0.246476	35	25.5	1202.01	0.569821
MDA-MB-468	18.334	0.203815	5	2.5	264.053	0.610506
MDA-MB-468	20.6219	0.282619	198	181	5795.51	0.280157
MDA-MB-468	15.0121	0.312882	45	27	1142.99	0.45343
MDA-MB-468	18.2644	0.20858	12.5	4	721.543	0.494189
MDA-MB-468	19.8992	0.339124	78	54	2261.62	0.377102
MDA-MB-468	17.5535	0.34628	35.5	32.5	11527.3	0.0296469
MDA-MB-468	18.2992	0.261645	41.5	33.5	2475.29	0.391367
MDA-MB-468	21.5577	0.365135	234	214.5	3433.66	0.135939
MDA-MB-468	20.591	0.293437	35.5	37	3505.11	0.259315
MDA-MB-468	19.5115	0.304086	21.5	14.5	1406.59	0.400752
MDA-MB-468	13.2073	0.302226	33.5	29	2200.52	0.350805
MDA-MB-468	19.2156	0.361142	152.5	136	3632.85	0.248879
MDA-MB-468	23.7764	0.414962	27.5	21.5	1353.29	0.353234
MDA-MB-468	19.3477	0.257164	83.5	46.5	3155.74	0.343155
MDA-MB-468	20.0902	0.300996	143.5	130	4447.57	0.337528
MDA-MB-468	20.0585	0.325077	113	107.5	4146.32	0.279723
MDA-MB-468	20.7757	0.343774	477	461.5	5774.08	0.274706
MDA-MB-468	19.0158	0.264592	107	61.5	4656.19	0.273383
MDA-MB-468	18.9151	0.29745	19.5	15	1620.11	0.379295
MDA-MB-468	14.1835	0.402466	145.5	141.5	4160.47	0.126801
MDA-MB-468	18.4379	0.203192	6.5	4.5	869.124	0.457651
MDA-MB-468	24.5925	0.318122	31.5	23.5	1404.96	0.301359
MDA-MB-468	18.0188	0.210532	21.5	15	162.146	0.983029
MDA-MB-468	17.9125	0.227997	12.5	6	1141.56	0.428529
MDA-MB-468	17.7339	0.227129	19	6	1559.46	0.361546
MDA-MB-468	21.2303	0.358787	81.5	71.5	3590.84	0.187975
MDA-MB-468	18.8476	0.27657	54	40.5	3132.17	0.31327
MDA-MB-468	21.4392	0.348292	53	42.5	2167.78	0.353149
MDA-MB-468	20.0267	0.29988	21.5	11.5	955.637	0.452157
MDA-MB-468	18.6439	0.271992	5.5	4	519.037	0.49062
MDA-MB-468	23.8032	0.382717	4.5	3	140.201	0.625758
MDA-MB-468	19.0492	0.306327	5	3	241.399	0.582889
MDA-MB-468	17.6258	0.255645	6.5	3	178.028	0.666405
MDA-MB-468	27.2919	0.244029	16.5	10	1440.53	0.398128
MDA-MB-468	19.5115	0.300209	24.5	17	1629.12	0.374733
MDA-MB-468	16.6603	0.402743	12.5	17.5	1878.9	0.349238
MDA-MB-468	18.5412	0.270052	38.5	22	2243.37	0.319012
MDA-MB-468	17.0382	0.208956	25	10	1696.01	0.414392
MDA-MB-468	20.8674	0.313043	107	96.5	3743.34	0.252922
MDA-MB-468	19.8672	0.252574	91.5	93	5532.67	0.0956835
MDA-MB-468	18.1245	0.225353	63.5	46	3332.29	0.374391
MDA-MB-468	17.7697	0.204966	11	6	742.176	0.515704
MDA-MB-468	19.0158	0.260347	20	12	1575.79	0.385279
MDA-MB-468	20.7757	0.33126	77.5	62	2583.05	0.360093
MDA-MB-468	24.4106	0.336854	15.5	20.5	5159.82	0.0769897
MDA-MB-468	26.9633	0.209545	10	8	703.292	0.55248
MDA-MB-468	30.0242	0.427579	8.5	4	817.295	0.331609
MDA-MB-468	19.4461	0.284318	124.5	115.5	5796.99	0.214751
MDA-MB-468	22.4828	0.395112	341	335.5	4321.36	0.245808
MDA-MB-468	17.9125	0.230512	10	4.5	1047.13	0.400952
MDA-MB-468	26.4869	0.286147	100.5	91.5	3762.89	0.334558
MDA-MB-468	21.2603	0.338987	9	6.5	2324.08	0.187665
MDA-MB-468	26.4628	0.336088	14	10	1001.78	0.399959
MDA-MB-468	18.334	0.257726	16	11	1394.62	0.417864
MDA-MB-468	19.0492	0.278401	77.5	61.5	4240.02	0.253368
MDA-MB-468	13.4462	0.289363	9.5	6	566.651	0.499641
MDA-MB-468	17.5172	0.25639	11.5	4.5	511.306	0.52151
MDA-MB-468	18.8138	0.267045	36.5	19.5	1474.13	0.450728
MDA-MB-468	13.2555	0.38737	408.5	396.5	4362	0.349718
MDA-MB-468	15.757	0.213293	7.5	2.5	436.265	0.527875
MDA-MB-468	16.9633	0.231735	14.5	3.5	312.931	0.600259
MDA-MB-468	15.6353	0.210949	6	2.5	212.987	0.636138
MDA-MB-468	20.0902	0.319035	424.5	391.5	5510.68	0.240665
MDA-MB-468	23.3168	0.337626	18.5	11.5	781.359	0.47558
MDA-MB-468	16.4294	0.237543	23	9.5	1705.53	0.389067
MDA-MB-468	12.8655	0.25971	37.5	24	1392.67	0.493787
MDA-MB-468	7.65304	0.328116	30	28	1964.49	0.354847
MDA-MB-468	13.0619	0.306146	157.5	140.5	5101.54	0.218734
MDA-MB-468	18.1595	0.262933	19	9.5	1547.99	0.372081
MDA-MB-468	25.1808	0.405108	19	26.5	1997.13	0.251129
MDA-MB-468	20.591	0.313488	310.5	293.5	7090.14	0.245787
MDA-MB-468	12.666	0.298928	24.5	16	1891.32	0.335764
MDA-MB-468	18.5068	0.254675	53	39	3090.72	0.328566
MDA-MB-468	17.6619	0.221629	46	23.5	1373.94	0.296171
MDA-MB-468	19.5441	0.303594	46	38.5	1961.17	0.419735
MDA-MB-468	20.591	0.33757	44	32	1961.59	0.37709
MDA-MB-468	23.0698	0.404785	11.5	11	693.858	0.444058
MDA-MB-468	19.2487	0.288269	8	3.5	487.156	0.486468
MDA-MB-468	18.5412	0.235757	15	7.5	1059.59	0.45679
MDA-MB-468	19.1824	0.276012	7	3.5	413.115	0.514148
MDA-MB-468	18.8476	0.263674	30.5	22	2513.26	0.327669
MDA-MB-468	19.8351	0.358157	121	101.5	4160.3	0.20185
MDA-MB-468	18.6439	0.23712	12	6	1287.46	0.392413
MDA-MB-468	17.6258	0.281079	15	4	321.149	0.583541
MDA-MB-468	25.1302	0.215994	29.5	9.5	831.784	0.546212
MDA-MB-468	18.6097	0.286142	12.5	7.5	1347.82	0.351896
MDA-MB-468	16.8125	0.236077	10	5.5	2515.8	0.265709
MDA-MB-468	17.9834	0.265669	5.5	2.5	1009.11	0.341209
MDA-MB-468	21.11	0.380159	20.5	16	1560.56	0.324271
MDA-MB-468	18.9151	0.404714	12	8	580.876	0.451712
MDA-MB-468	13.4935	0.403535	532.5	503	5117.72	0.289084
MDA-MB-468	19.0158	0.291428	35	24.5	2585.03	0.302453
MDA-MB-468	13.9573	0.356055	14.5	9	575.82	0.488266
MDA-MB-468	14.0935	0.358579	61	51.5	2724.42	0.279158
MDA-MB-468	27.3152	0.364295	14	17.5	3011.36	0.169962
MDA-MB-468	19.8992	0.325827	23	16	1300.53	0.414221
MDA-MB-468	13.0619	0.316341	13	8.5	1947.4	0.267571
MDA-MB-468	24.201	0.287103	203	194	1830.93	0.644572
MDA-MB-468	13.1106	0.333386	49	33.5	2312.84	0.293185
MDA-MB-468	15.9577	0.437341	41.5	15.5	2066.7	0.223499
MDA-MB-468	21.7926	0.390051	192	179	4416.14	0.229548
MDA-MB-468	20.9891	0.436824	31	23.5	275.752	0.798369
MDA-MB-468	24.2536	0.436261	274	251	4338.51	0.149569
MDA-MB-468	21.2303	0.381567	10	8	525.583	0.486096
MDA-MB-468	22.7362	0.396523	287.5	273.5	4691.9	0.190248
MDA-MB-468	30.2355	0.263058	23	18	2524.37	0.295923
MDA-MB-468	23.5071	0.396155	302.5	274	4231.24	0.202393
MDA-MB-468	13.0131	0.269123	32.5	23	2449.36	0.319436
MDA-MB-468	30.7574	0.647745	64.5	27.5	1862.18	0.178102
MDA-MB-468	20.0267	0.301046	64.5	54	2329.7	0.406018
MDA-MB-468	19.3477	0.292274	103.5	87	3968.36	0.303461
MDA-MB-468	18.8138	0.224492	12.5	4.5	1541.64	0.342992
MDA-MB-468	21.851	0.389225	107	83	3232.57	0.237207
MDA-MB-468	18.4379	0.316057	8.5	2.5	1712.64	0.231189
MDA-MB-468	20.7143	0.381834	12	7	908.001	0.370837

## Sheet: OVCA433
Cell Line	Diameter	Strain	Transit Time	Entry Time	Elastic Modulus	Beta
	um	-	ms	ms	Pa	-
GFP	24.6442	0.396508	4	5.5	3232.88	0.0886192
GFP	27.7315	0.477347	411	397.5	4168.39	0.094589
GFP	23.7764	0.495813	7.5	4	30.3684	0.884468
GFP	31.5946	0.716572	128.5	105.5	4666.66	0.00092806
GFP	21.6755	0.53198	14.5	9.5	1345.78	0.264006
GFP	24.6442	0.279966	62.5	60.5	1812.01	0.527503
GFP	15.6353	0.370012	5	2	18.7793	0.912327
GFP	26.9869	0.374134	29	28	192.622	0.939122
GFP	16.5837	0.352911	8.5	4.5	193.463	0.62154
GFP	21.0799	0.228137	29	16.5	182.138	0.94838
GFP	25.4574	0.385921	11.5	7.5	500.706	0.483886
GFP	32.3316	0.464423	4.5	15	2386.07	0.147828
GFP	29.5541	0.604475	960.5	413.5	3519.6	0.100186
GFP	30.8401	0.483278	1581.5	830.5	4185.36	0.267809
GFP	27.5704	0.531589	20	28	1220.03	0.363874
GFP	22.2265	0.284232	39	29.5	2538.74	0.324083
GFP	24.6183	0.381256	24.5	22.5	1549.84	0.328213
GFP	24.9267	0.267702	40	38.5	904.201	0.436145
GFP	24.7987	0.30809	11.5	8	957.563	0.418734
GFP	25.3572	0.489439	6	3	62.0647	0.754472
GFP	26.5109	0.372152	123	119.5	3067.63	0.307769
GFP	15.1808	0.371138	130	102	5088.36	0.175757
GFP	20.4046	0.19223	17	12	238.647	0.757267
GFP	29.9818	0.330018	5.5	4	131.183	0.703718
GFP	27.2919	0.224072	2	4.5	3579.95	0.218122
GFP	27.8003	0.274201	7	3.5	5335.64	0.0643966
GFP	18.9487	0.221407	6.5	3.5	1035.91	0.404092
GFP	27.175	0.550127	27.5	36.5	2033.32	0.188856
GFP	24.4887	0.314524	3	3.5	188.728	0.631268
GFP	33.6439	0.274811	7.5	5	829.779	0.428097
GFP	27.5241	0.378987	433.5	435	5325.97	0.00722101
GFP	28.3221	0.456995	167.5	179	3501.26	0.24977
GFP	20.2795	0.292073	25	18.5	2617.23	0.298366
GFP	18.334	0.279298	84.5	56	1387.16	0.578157
GFP	32.6451	0.405145	208.5	193.5	4779.74	0.0912368
GFP	20.0267	0.287491	13.5	9.5	1033.56	0.41066
GFP	21.6755	0.273642	13.5	11.5	1425.32	0.419814
GFP	13.6809	0.553552	1373.5	1310	4810.1	0.21386
GFP	22.9591	0.365485	64	51	2766.73	0.269588
GFP	22.9036	0.291272	56.5	45.5	4215.63	0.228237
GFP	20.4669	0.287284	16.5	5	362.292	0.591024
GFP	21.9672	0.247969	3.5	2	1047.21	0.330021
GFP	27.175	0.404148	2.5	3.5	331.866	0.483133
GFP	23.1249	0.315723	8	4.5	1083.39	0.347299
GFP	26.75	0.439756	137	145	2158.76	0.382528
GFP	22.5394	0.293317	4.5	2	453.645	0.445007
GFP	20.8674	0.321024	19	14	853.769	0.476897
GFP	24.7473	0.192363	32.5	4.5	1295.52	0.383043
GFP	20.8369	0.383459	15	24.5	3326.14	0.162067
GFP	23.0421	0.282356	19.5	9.5	957.785	0.441956
GFP	21.7048	0.32033	348.5	330.5	5442.77	0.305878
GFP	27.3385	0.418388	37	19	2624.48	0.165804
GFP	37.8133	0.485081	1455.5	1085	4766.94	0.0892412
GFP	33.7572	0.435272	28	19	424.808	0.612399
GFP	35.3959	0.29318	443.5	245.5	3132.65	0.152408
GFP	22.2265	0.234192	17	11	671.217	0.5511
GFP	23.5342	0.518992	6	5.5	587.806	0.383712
GFP	21.2003	0.282746	9.5	3.5	965.054	0.368501
GFP	21.6166	0.282063	13.5	11	1908.06	0.319419
GFP	14.1386	0.17518	709.5	126.5	4166.27	0.179107
GFP	23.8566	0.454265	1442	770	4450.39	0.318684
GFP	26.3664	0.347406	35	16	3147.25	0.173656
GFP	23.8032	0.29835	6.5	5	1945.74	0.23258
GFP	24.9522	0.309041	313.5	316.5	4910.13	0.263963
GFP	24.122	0.432119	41.5	38.5	2262.91	0.246777
GFP	20.6219	0.252842	24	19	733.22	0.579759
GFP	28.3221	0.285506	163.5	110	6259.92	0.0593778
GFP	25.5323	0.316753	569	314.5	4038.17	0.536046
GFP	14.3175	0.322182	4	4.5	604.572	0.437476
GFP	25.5074	0.348192	48.5	42.5	2806.65	0.269677
GFP	16.8503	0.348214	91	75.5	2516.79	0.409528
GFP	30.1512	0.362078	173.5	60	5478.48	0.058577
GFP	22.3977	0.23443	25.5	16	2720.92	0.317692
GFP	19.3147	0.272852	12.5	10.5	1118.49	0.426886
GFP	22.8201	0.358075	11	10.5	1575.19	0.277957
GFP	26.4147	0.395927	137.5	102	4011.3	0.183073
GFP	21.9382	0.215563	13.5	8.5	4791.43	0.0802909
GFP	22.7642	0.207766	9.5	5.5	2520.85	0.262817
GFP	27.0576	0.462034	126	134.5	3186.09	0.26582
GFP	15.4304	0.377176	5.5	2.5	1124.88	0.267598
GFP	12.9149	0.327981	1.5	2	973.94	0.306969
GFP	25.8051	0.36674	15	15	1770.42	0.273185
GFP	26.8924	0.663841	43.5	41	1386.52	0.25179
GFP	23.5342	0.270187	25.5	16.5	1176.09	0.463226
GFP	29.8967	0.414946	495.5	25.5	4588.31	0.0316778
GFP	24.9522	0.384697	8	6	417.481	0.500704
GFP	32.1142	0.435641	8	10	1722.18	0.225885
GFP	26.3181	0.425495	17	17	2686.41	0.154804
GFP	20.8979	0.185397	10.5	5.5	704.109	0.527332
GFP	24.5147	0.358313	9	6	1545.66	0.264067
GFP	20.6835	0.287417	42.5	25	2068.56	0.316463
GFP	23.0145	0.208396	6	4.5	1964.28	0.306406
GFP	21.9672	0.443394	12.5	9.5	629.811	0.489535
GFP	21.0799	0.288159	10	6	1587.97	0.283328
GFP	26.75	0.445527	219.5	195	4687.67	0.135553
GFP	23.2073	0.328908	69.5	58	3972.25	0.190476
GFP	26.3181	0.37123	41.5	36.5	954.564	0.607132
GFP	6.18039	0.446506	18.5	26	2487.81	0.18637
GFP	13.2554	0.421594	240.5	232.5	3542.12	0.396699
GFP	22.5111	0.299695	233	182.5	4888.88	0.203853
GFP	21.7048	0.312508	17.5	14	2095.36	0.272921
GFP	28.746	0.497786	64	44	3521.35	0.0709408
GFP	22.3408	0.178162	8	5	4718.58	0.158572
GFP	30.2986	0.435354	210	181	4167.51	0.157665
GFP	22.0251	0.254249	35.5	30	2201.32	0.343049
GFP	23.2073	0.257243	4.5	2.5	181.7	0.636595
GFP	24.0427	0.329919	31.5	26.5	1711.67	0.406057
GFP	21.4392	0.203199	9.5	2	36.3828	0.907748
GFP	30.2776	0.557924	330.5	321.5	3296.27	0.151981
GFP	25.8298	0.349497	42.5	39	1672.87	0.362769
GFP	25.5074	0.460095	201.5	190.5	2582.78	0.400116
GFP	21.0799	0.28779	66.5	56.5	3577.47	0.298836
GFP	25.1302	0.326309	121.5	102.5	4394.82	0.232931
GFP	26.8213	0.455882	24	36.5	1702.25	0.290795
GFP	22.4261	0.24943	68	54	2643.37	0.432748
GFP	20.4358	0.222181	5	2.5	77.2888	0.815545
GFP	24.201	0.315852	12	10	2407.26	0.186027
GFP	25.0795	0.340365	95	87	2362.53	0.433143
GFP	31.5341	0.436365	12.5	9	1942.79	0.194228
GFP	21.7634	0.216661	21	17.5	3920.63	0.283802
GFP	31.2298	0.547538	12	2.5	1224.87	0.205819
GFP	17.5897	0.379387	9	8	296.552	0.596352
GFP	13.8658	0.210855	15	12	1133.15	0.500509
GFP	24.306	0.635743	187.5	9.5	2561.74	0.0642922
GFP	19.4461	0.216748	3.5	3.5	2221.09	0.258832
GFP	22.5958	0.31881	24.5	14	4248.51	0.0990012
GFP	24.5147	0.319246	19	22.5	3002.59	0.227406
GFP	26.3664	0.265299	61.5	56.5	3914.1	0.25831
GFP	8.44402	0.501899	51.5	52	2354.01	0.272589
GFP	22.4545	0.230773	10	6.5	2597.51	0.269252
GFP	21.9672	0.228922	37.5	26.5	1987.14	0.235783
GFP	21.9962	0.259175	6.5	4.5	137.26	0.73778
GFP	25.879	0.73472	51	49	751.756	0.432218
GFP	28.4566	0.473143	59	30	2944.21	0.144737
GFP	22.7642	0.298343	9	7	866.35	0.407151
GFP	20.5291	0.284376	2.5	2.5	218.955	0.578598
GFP	25.4073	0.368863	98	69.5	4181.77	0.101645
GFP	22.9036	0.365876	85.5	64.5	2142.93	0.351787
GFP	28.0511	0.564635	1565.5	1452.5	4228.01	0.313278
GFP	20.8063	0.19664	12.5	6	1065.32	0.445965
GFP	27.1046	0.236606	4	4	1691.99	0.310413
GFP	30.4871	0.453523	113.5	127	3778.34	0.10029
GFP	24.5924	0.228657	21.5	20.5	2645.72	0.277445
GFP	22.9591	0.379603	3	10	3348.49	0.132271
GFP	34.9433	0.428704	257.5	37	4251.57	0.0497254
GFP	22.8201	0.292534	17	13	1175.11	0.438703
GFP	15.3061	0.20822	14.5	4	1233.34	0.397355
GFP	23.1249	0.275017	18	16	1757.47	0.349933
GFP	27.2452	0.418252	106	95.5	4908.51	0.0634673
GFP	19.674	0.237235	2.5	2	53.5386	0.816493
GFP	22.2837	0.261484	6	2	657.952	0.41123
GFP	22.7362	0.324923	5.5	4	846.12	0.389856
GFP	22.5394	0.433218	536.5	264.5	4142.37	0.187022
GFP	15.9577	0.284235	6	8.5	3064.73	0.192277
GFP	23.3168	0.256361	43.5	29.5	3949.32	0.214789
GFP	31.1073	0.459238	238	107	3876.06	0.0713434
GFP	19.7386	0.313265	4	3.5	144.134	0.675572
GFP	26.0751	0.443234	30	28.5	2032.82	0.235459
GFP	24.8756	0.393911	66	42	638.395	0.692366
GFP	22.1404	0.39062	23	15.5	1675.17	0.289651
GFP	14.3619	0.359294	7.5	6.5	756.143	0.400063
GFP	22.5958	0.344116	50	26	2020.51	0.154419
GFP	24.0956	0.32375	829	328	5530.41	0.142785
GFP	18.4724	0.328234	9.5	6	1580.58	0.23844
GFP	26.1969	0.411725	64	59	2179.41	0.376796
GFP	19.7386	0.537758	8.5	4	162.976	0.557418
GFP	23.8566	0.394168	6	4.5	467.995	0.445683
GFP	23.8032	0.373859	29	26.5	2374.21	0.250025
GFP	24.6183	0.369294	4.5	3.5	488.638	0.426738
GFP	24.9267	0.300706	15.5	14.5	2092.32	0.301762
GFP	24.5924	0.368124	63	61.5	2356.43	0.357559
GFP	23.2895	0.265598	8.5	7	1601.48	0.336654
GFP	32.8007	0.226118	3.5	5	1185.79	0.390098
GFP	7.22515	0.363697	50	63.5	5958.94	0.0540496
GFP	22.0828	0.238382	25.5	12.5	3514.17	0.192677
GFP	22.9036	0.382562	35	36.5	3298.2	0.188213
GFP	32.6451	0.538036	248	18.5	752.376	0.371726
GFP	13.8198	0.305864	116.5	102	5277.8	0.13849
GFP	24.0692	0.444795	50	41	2473.52	0.181974
GFP	22.3693	0.386929	1208	1154	6902.98	0.442404
GFP	24.7987	0.386079	82	78.5	3090.2	0.237698
GFP	22.2265	0.331645	3.5	2.5	1041.75	0.301536
GFP	14.7555	0.441918	16	13	1527.24	0.303188
GFP	7.73578	0.375982	197.5	199.5	2671.27	0.200538
GFP	23.7496	0.252083	9.5	6.5	1309.04	0.379398
GFP	22.1978	0.243284	6.5	8	2264.54	0.305408
GFP	15.5945	0.327059	17.5	14.5	980.139	0.435177
GFP	26.1482	0.324712	5.5	4.5	681.637	0.423139
GFP	28.8345	0.360039	7	7	966.582	0.38156
GFP	15.2644	0.37988	25.5	16.5	1166.38	0.399892
GFP	28.0738	0.478043	5	10.5	2782.95	0.124286
GFP	22.9314	0.374053	10	8	1702.71	0.244717
GFP	24.306	0.262636	3	3	2131.47	0.219115
GFP	20.6527	0.353291	20.5	13.5	1173.53	0.394346
GFP	25.879	0.327658	4.5	5	2085.97	0.196415
GFP	20.0902	0.304503	19	13.5	1267.22	0.40246
GFP	21.9092	0.309139	21	11	2765.32	0.248359
GFP	22.8758	0.338042	49	39.5	2870.32	0.260248
GFP	22.054	0.390352	49.5	30	2424.76	0.224832
GFP	20.0267	0.358202	259.5	227.5	4059.78	0.251899
GFP	25.7557	0.309388	13.5	7	678.657	0.477104
GFP	18.8138	0.499198	6	6.5	822.623	0.330038
GFP	23.696	0.309291	9	4.5	496.084	0.482851
GFP	27.5704	0.30777	13	21.5	3088.9	0.255788
GFP	25.332	0.356812	42	33.5	2588.48	0.251746
GFP	14.7986	0.357153	6.5	5.5	2455.21	0.188105
GFP	12.153	0.207366	70.5	2.5	65.4138	0.837682
GFP	24.773	0.458531	15.5	10	1367.44	0.281944
GFP	23.8566	0.37031	8	7.5	595.502	0.448311
GFP	24.3584	0.355516	30	26	1680.03	0.366305
GFP	16.2737	0.334031	16	27	3841.83	0.127196
GFP	16.888	0.304503	55.5	39	2772.14	0.289415
GFP	25.4073	0.296443	32.5	26	2852.41	0.317646
GFP	27.7085	0.365913	179	106.5	3540.97	0.193767
GFP	26.9869	0.337095	22.5	16	2322.11	0.245422
GFP	24.201	0.31374	56	45	3344.95	0.270829
GFP	22.8479	0.243343	12.5	6	555.681	0.529009
GFP	22.5394	0.285476	175	133	4858.01	0.217522
GFP	33.2824	0.416134	8	8.5	1140.54	0.314662
GFP	7.65304	0.182294	6.5	5.5	1260.49	0.413219
GFP	21.4985	0.357334	1977	1953.5	8479.6	0.35234
GFP	28.367	0.519923	36.5	45.5	2226.92	0.181571
GFP	33.4541	0.37204	9	8.5	2665.27	0.154027
GFP	19.9949	0.20846	6.5	3	135.57	0.735566
GFP	17.0008	0.294606	1.5	3	75.8998	0.771759
GFP	8.51908	0.302717	92	91	4997.85	0.27174
GFP	23.5342	0.357779	12.5	12	1538.56	0.287144
GFP	27.7085	0.443836	474	452	5017.53	0.105868
GFP	26.7975	0.391302	53	49.5	1395.68	0.414927
GFP	13.5875	0.314584	19	10	278.652	0.689776
GFP	14.7123	0.289315	25	20	810.948	0.527167
GFP	23.4258	0.292825	7	5	4084.16	0.126652
GFP	25.2817	0.414207	34	32	2275.65	0.21384
GFP	26.9633	0.363535	38.5	45.5	3449.48	0.177179
GFP	15.9177	0.352291	15.5	7.5	660.119	0.496221
GFP	15.1388	0.563895	36	18	1840.16	0.165441
GFP	22.5676	0.280774	12.5	7.5	896.98	0.434483
GFP	21.9962	0.385518	5	3.5	1085.1	0.287914
GFP	25.6567	0.264027	3.5	3	321.064	0.541961
GFP	19.7063	0.163911	7.5	3.5	1560.78	0.33538
GFP	21.5872	0.37123	46.5	44.5	3010.11	0.223489
GFP	27.2218	0.435353	45.5	51.5	1534.46	0.320985
GFP	7.5694	0.599817	26.5	25.5	3220.9	0.0914986
GFP	14.2283	0.386312	11	13.5	2236.44	0.220107
GFP	24.3584	0.345962	55.5	46.5	2894.72	0.246186
GFP	19.7708	0.291139	6.5	2.5	150.83	0.642365
GFP	15.0967	0.301354	66	61.5	2876.42	0.357019
GFP	21.8218	0.453629	2157.5	2093	6811.65	0.374184
GFP	22.2265	0.273224	64.5	51.5	2260.84	0.48647
GFP	27.8461	0.449114	25	21	1850.31	0.258805
GFP	17.9125	0.41615	918	304.5	4793.67	0.0764412
GFP	34.3369	0.540195	7	10.5	515.566	0.475053
GFP	21.2303	0.260161	15.5	6	368.006	0.616071
GFP	29.5756	0.296763	3	2.5	460.847	0.457852
GFP	13.4934	0.394912	144	37	2616.14	0.247251
GFP	23.0421	0.551994	34.5	36	881.747	0.433655
GFP	25.5074	0.40436	2	13	1894.84	0.246903
GFP	16.1953	0.533631	1023	650	4472.3	0.106586
GFP	30.0666	0.539455	386	342	3325.78	0.212598
GFP	25.0032	0.287284	36.5	27	2125.61	0.340531
GFP	8.05824	0.34243	18.5	20.5	2235.05	0.277254
GFP	18.9487	0.283853	27.5	18	1572.44	0.391792
GFP	23.3441	0.30959	33.5	27	2746.47	0.236174
GFP	26.8687	0.548563	563	564.5	2776.94	0.508376
GFP	25.607	0.4437	142.5	141.5	2768.52	0.232828
GFP	26.2939	0.472858	110.5	90.5	3768.26	0.0646618
GFP	31.0663	0.283658	246	219.5	2649	0.462666
GFP	15.2644	0.316465	71	60.5	5090.02	0.176114
GFP	31.6148	0.32352	7.5	6	908.67	0.387205
GFP	17.9834	0.271721	7	3.5	785.443	0.424663
GFP	17.2977	0.370253	55	51.5	842.651	0.558732
GFP	28.0738	0.253899	3.5	2	409.016	0.496479
GFP	23.6422	0.442966	593.5	566.5	3794.07	0.441415
GFP	12.666	0.404359	96.5	80.5	3648.01	0.155855
GFP	16.5837	0.427535	63.5	46.5	1072.9	0.439874
GFP	24.9012	0.387934	62	72.5	2900.26	0.279141
GFP	24.6183	0.414808	589	84	4355.98	0.0629173
GFP	22.2551	0.239775	10	6.5	1865.65	0.302787
GFP	22.5958	0.327865	39	28.5	2092.55	0.348498
GFP	26.1239	0.379877	121	125.5	3600.08	0.226228
GFP	21.1402	0.242335	7	3.5	1482.72	0.306217
GFP	16.0373	0.428147	120.5	98	2626.74	0.302114
GFP	27.0811	0.392061	88	77.5	4084.87	0.11395
GFP	21.6461	0.337981	10.5	5	73.0346	0.849738
GFP	23.0421	0.261436	95	84.5	5254.57	0.215379
GFP	29.2944	0.472875	1330	348	3033.78	0.291223
GFP	27.034	0.336435	107.5	100.5	2613.37	0.232194
GFP	18.8477	0.478363	196.5	177.5	4213.93	0.0842476
GFP	17.2609	0.424602	32.5	41.5	2224.87	0.25941
GFP	24.3584	0.253482	6	4.5	253.486	0.647374
GFP	23.3168	0.346635	23	23.5	2639.41	0.224986
GFP	23.6422	0.313967	9	6.5	1100.93	0.368514
GFP	23.2073	0.455992	21	19.5	938.118	0.398546
GFP	24.201	0.293829	8	6.5	1570.85	0.29977
GFP	25.1808	0.360122	11	11	2156.69	0.228736
GFP	14.7986	0.242479	2.5	2	276.187	0.558054
GFP	21.7048	0.219769	27.5	21	1976.95	0.403481
GFP	22.4261	0.282323	3	2.5	79.804	0.754713
GFP	9.02703	0.332759	11	11	1018.82	0.417046
GFP	25.3069	0.440397	9.5	14.5	1929.83	0.220181
GFP	23.7228	0.330507	14.5	13.5	1206.73	0.379254
GFP	20.8674	0.204274	14	5.5	848.075	0.512208
GFP	24.7216	0.369464	102	95	4129.87	0.190692
GFP	24.4887	0.335749	22	17.5	1685.56	0.324487
GFP	14.6689	0.289755	12.5	9	1054.66	0.417215
GFP	24.4887	0.376617	6.5	6.5	930.64	0.355505
GFP	23.9099	0.337015	29.5	17.5	2314.09	0.255039
GFP	27.9601	0.431909	8	7	2067.21	0.192819
GFP	26.0262	0.392702	23.5	14.5	1137.34	0.363594
GFP	16.7746	0.41887	7.5	4	4677.43	0.035953
GFP	14.8415	0.456569	42.5	18	3000.52	0.115459
GFP	20.6527	0.223823	12.5	5.5	1568.68	0.389938
GFP	29.4894	0.31317	74	57.5	3065.58	0.316513
GFP	23.7496	0.267179	12.5	8.5	1749.57	0.324897
GFP	25.7557	0.377734	51.5	54	3232.14	0.19416
GFP	16.8125	0.250681	180	158	3916.44	0.427868
GFP	22.4828	0.257706	10.5	6	843.051	0.45634
GFP	21.3499	0.548551	227	184.5	2166.58	0.37956
GFP	23.3986	0.278382	19.5	10.5	1223.09	0.407654
GFP	25.1555	0.381671	88.5	79.5	3401.19	0.188583
GFP	25.1302	0.34781	463	468.5	6302.53	0.259095
GFP	21.9092	0.234564	11	6	1587.04	0.35457
GFP	21.2003	0.3149	14.5	7.5	1395.58	0.31316
GFP	19.9631	0.287476	36.5	22	2019.67	0.347194
GFP	14.4062	0.232255	13	7	4372.85	0.137537
GFP	22.3693	0.410669	53.5	42	2231.75	0.274755
GFP	22.1116	0.583116	136.5	122.5	1641.88	0.477795
GFP	35.9491	0.316465	2.5	5	389.392	0.525769
GFP	15.389	0.442909	199.5	148	3586.68	0.190259
GFP	19.7386	0.273746	15	6.5	559.858	0.52808
GFP	21.6166	0.350762	39.5	34	2139.06	0.335634
GFP	16.9633	0.36629	82	41.5	3442.25	0.21165
GFP	19.7708	0.410743	44	28	1562.88	0.384417
GFP	15.757	0.329182	7	3.5	1399.38	0.281426
GFP	33.225	0.458002	592.5	513	4597.41	0.117573
GFP	20.9587	0.061725	6.5	10	2913.41	0.224633
GFP	20.9283	0.26756	10	6.5	469.472	0.55407
GFP	16.8503	0.325492	6	5.5	4888.32	0.0417928
GFP	11.9416	0.330522	29	11.5	5629.72	0.0130455
GFP	15.3476	0.368853	4	2	90.9999	0.674615
GFP	26.1482	0.362025	191	196	4953.52	0.13116
GFP	24.5665	0.491883	124.5	92	2246.29	0.398528
GFP	25.5323	0.398063	82	74.5	3075.18	0.257458
GFP	31.9552	0.272126	214	4.5	1999.15	0.214743
GFP	16.9257	0.328848	26.5	23	1664.55	0.371985
GFP	26.2454	0.495574	110	57.5	4024.96	0.0733896
GFP	26.2454	0.370221	5	2	747.46	0.328651
GFP	17.8412	0.435266	50	38.5	3731.1	0.143949
GFP	31.6349	0.553635	466	453	4121.91	0.119801
GFP	27.6165	0.387934	8.5	3.5	458.217	0.437032
GFP	28.2546	0.326014	14	10.5	924.353	0.437055
GFP	14.4062	0.350727	40.5	26.5	659.627	0.649558
GFP	23.9631	0.334129	100.5	77	3479.17	0.234516
GFP	22.1978	0.285476	82.5	79	4572.39	0.216722
GFP	31.189	0.436196	219	211	3889.9	0.188066
GFP	31.2298	0.255612	48	43	2137.16	0.475942
GFP	20.8979	0.293454	21.5	18.5	3637.13	0.203623
GFP	22.0251	0.25752	8	6	1844.8	0.289229
GFP	10.94	0.417514	419.5	400.5	5617.62	0.203062
GFP	22.7082	0.358373	13	12	4591.53	0.0727957
GFP	21.3797	0.217601	15	9.5	351.184	0.781406
GFP	25.2061	0.452159	187	173.5	2947.18	0.34432
GFP	22.9314	0.281479	11	11	2516.59	0.189599
GFP	16.0769	0.3058	19	13	1453.19	0.352848
GFP	21.5872	0.355531	4	3	429.19	0.449123
GFP	30.4871	0.379347	27	29.5	2052.68	0.259467
GFP	14.1386	0.425991	11.5	6.5	2211.66	0.179451
GFP	23.2347	0.416811	12	13.5	2631.35	0.135948
GFP	22.1691	0.231125	1.5	5.5	464.572	0.562687
GFP	16.8125	0.367495	13.5	10	2633.3	0.195567
GFP	15.9975	0.387748	19	11.5	1354.32	0.292401
GFP	22.3122	0.250232	18	14	1417.3	0.422395
GFP	13.6343	0.326747	12	8.5	925.467	0.403074
GFP	35.9314	0.503196	27.5	30.5	1991.85	0.196097
GFP	23.8299	0.504889	18.5	15.5	342.981	0.631267
GFP	23.5071	0.32275	10	4.5	2372.13	0.177258
GFP	14.6689	0.744052	125	87.5	3788.66	0.0568067
GFP	22.9591	0.349544	4.5	3	1679.05	0.28896
GFP	23.7764	0.328021	84	75.5	3936.3	0.186054
GFP	25.1302	0.35643	23	17.5	1765.47	0.303616
GFP	19.9631	0.287105	89	59.5	2807.96	0.347067
GFP	26.2454	0.371799	284	264.5	5099.88	0.106816
GFP	17.187	0.469306	24.5	34.5	2243.86	0.207203
GFP	22.8758	0.294514	32	30	2755.13	0.287293
GFP	19.7708	0.419124	14.5	15.5	506.762	0.563716
GFP	12.9149	0.581885	1504.5	328.5	2646.74	0.279375
GFP	16.0769	0.282976	38.5	31	1881.68	0.399824
GFP	22.5958	0.30094	49.5	46.5	2952.9	0.286924
GFP	18.5068	0.428493	5.5	3.5	866.05	0.302371
GFP	20.5291	0.378982	7	3	1102.12	0.280424
GFP	24.5665	0.329184	54	27	1174.63	0.441015
GFP	22.7921	0.329873	55.5	50.5	2873.76	0.308077
GFP	35.736	0.382949	30.5	17	2725.49	0.20838
GFP	22.5394	0.319644	184	183.5	4878.64	0.232027
GFP	14.7986	0.324979	105.5	79.5	2920	0.311736
GFP	16.9633	0.359271	2.5	2.5	41.7325	0.810048
GFP	22.5394	0.403719	6.5	16	458.815	0.548326
GFP	19.4788	0.389211	12.5	12.5	1184.94	0.343635
GFP	25.7063	0.430569	6.5	9.5	1379.84	0.266274
GFP	25.0795	0.431041	1233	1189.5	5332.05	0.135488
GFP	26.1726	0.514241	101	100	3803.37	0.0509817
GFP	21.6461	0.309915	12.5	10	2677.08	0.195385
GFP	22.4545	0.368334	2.5	3	437.298	0.451713
GFP	16.8503	0.334037	17	9.5	1028.42	0.399975
GFP	17.6979	0.385524	405	22.5	3075.59	0.192846
GFP	32.3512	0.49649	8.5	7	1579.16	0.197288
GFP	22.1978	0.490243	39.5	44.5	2841.93	0.139439
GFP	26.7023	0.451289	78	68	3388.55	0.173595
GFP	7.04673	0.345485	8	3.5	3779.03	0.0922576
SNAIL	32.1341	0.435178	2384	572	4934.07	0.0546442
SNAIL	22.0828	0.264027	4.5	4.5	160.181	0.710225
SNAIL	20.3734	0.236693	11.5	3.5	283.561	0.620783
SNAIL	21.3201	0.231754	9.5	5	7325.81	0.0667638
SNAIL	22.5394	0.319481	20.5	12.5	4739.27	0.0640845
SNAIL	26.9633	0.281071	3	2.5	253.872	0.568123
SNAIL	30.2986	0.334656	14.5	5.5	4350.76	0.0940732
SNAIL	20.2795	0.199127	27.5	13.5	2994.08	0.293203
SNAIL	22.2837	0.400727	29	16	472.199	0.602573
SNAIL	21.2003	0.22868	15.5	7	1343.58	0.37982
SNAIL	20.7757	0.242987	5	2.5	86.5707	0.765899
SNAIL	17.1499	0.411083	87	21.5	1107.01	0.392516
SNAIL	26.0507	0.310704	14.5	13.5	1540.56	0.331949
SNAIL	22.2837	0.422161	11	8	548.443	0.436249
SNAIL	22.0251	0.167231	57.5	8.5	917.811	0.471195
SNAIL	18.78	0.395344	14	5.5	32.2323	0.986538
SNAIL	21.1703	0.171999	8	4.5	76.5918	0.915366
SNAIL	26.0017	0.370838	12	13.5	1089.72	0.372353
SNAIL	20.8979	0.188189	17.5	5.5	388.011	0.626145
SNAIL	19.5767	0.273889	4	7.5	1772.18	0.208861
SNAIL	25.607	0.433593	30.5	29.5	3589.51	0.078414
SNAIL	22.1404	0.30368	30	19	2269.35	0.31295
SNAIL	22.3977	0.289648	13	7	3011.68	0.19689
SNAIL	30.716	0.253899	18	9.5	3889.04	0.175523
SNAIL	21.4095	0.309391	7	3	39.8198	0.932624
SNAIL	16.3128	0.342386	15.5	12	105.495	0.919949
SNAIL	23.8032	0.362421	47	40.5	3581.99	0.135807
SNAIL	22.4828	0.45805	9	2.5	652.873	0.321314
SNAIL	20.4358	0.196886	8	3.5	755.198	0.462586
SNAIL	20.6219	0.322492	13	7.5	173.018	0.750985
SNAIL	23.3713	0.313286	29	26	2211.74	0.265013
SNAIL	21.5872	0.380939	4.5	3	514.791	0.415225
SNAIL	23.8566	0.45612	47	44	2885.4	0.156407
SNAIL	22.1691	0.396883	18.5	12	939.55	0.378877
SNAIL	21.7926	0.277593	35	28.5	1229.24	0.49476
SNAIL	21.9382	0.24284	15.5	7	563.889	0.544668
SNAIL	21.11	0.226379	30	18	3924.75	0.220134
SNAIL	22.7642	0.362724	15.5	11	732.177	0.520167
SNAIL	25.1555	0.603225	30.5	19	1310.26	0.286957
SNAIL	21.9382	0.314413	9.5	6	590.265	0.461323
SNAIL	20.8063	0.179593	10	3	379.971	0.565872
SNAIL	20.7143	0.254519	14	6.5	264.613	0.688426
SNAIL	22.7642	0.292312	14	10	690.42	0.50239
SNAIL	20.591	0.340078	49.5	8.5	593.395	0.493304
SNAIL	13.3034	0.0717014	1.5	4	21295.4	0.134705
SNAIL	21.4689	0.415029	29.5	11.5	2896.64	0.205114
SNAIL	20.7757	0.237741	6.5	2.5	6154.53	0.0394604
SNAIL	24.201	0.424813	6.5	2.5	433.121	0.407019
SNAIL	25.731	0.254784	4	4.5	840.7	0.44
SNAIL	23.5882	0.324208	12	7.5	617.066	0.493747
SNAIL	22.7362	0.411328	15	9.5	151.096	0.778165
SNAIL	26.7023	0.364035	18.5	21	1654.91	0.317431
SNAIL	19.116	0.272334	4.5	2	76.7335	0.736799
SNAIL	17.5535	0.171381	8	3	292.647	0.58714
SNAIL	17.9834	0.358843	105	86.5	3466.44	0.335903
SNAIL	20.1219	0.288079	8.5	4.5	60.449	0.877886
SNAIL	24.1747	0.276805	31.5	5.5	4731.47	0.112935
SNAIL	19.1824	0.206151	7.5	4	2287.81	0.288625
SNAIL	20.6219	0.237754	9.5	7	1457.37	0.352124
SNAIL	18.6439	0.154505	25.5	5	319.424	0.727825
SNAIL	18.8814	0.388614	23.5	8	479.514	0.488868
SNAIL	18.8814	0.179112	12	5	2306.82	0.282706
SNAIL	21.5281	0.333839	11	5.5	816.595	0.411944
SNAIL	21.5281	0.356274	29.5	23	1385.27	0.385562
SNAIL	19.4134	0.0829241	7.5	4	1601.15	0.407757
SNAIL	22.7082	0.238673	20	15	1623.02	0.388422
SNAIL	21.9962	0.225493	15	12	1009.74	0.497827
SNAIL	20.6527	0.231802	22	11	2892	0.264339
SNAIL	19.6091	0.314856	9	4.5	135.899	0.715845
SNAIL	27.5704	0.31387	12	4.5	47.3108	0.900589
SNAIL	19.7063	0.21007	18.5	19	2435.81	0.32049
SNAIL	21.5872	0.348771	13	7.5	1095.74	0.358939
SNAIL	21.1402	0.273746	5.5	4	1927.04	0.251706
SNAIL	23.3441	0.126099	7	5	5162.52	0.174448
SNAIL	17.3345	0.147313	19	3	487.54	0.544445
SNAIL	23.0421	0.402155	11	6.5	646.731	0.4099
SNAIL	19.116	0.305353	8.5	3	211.638	0.588083
SNAIL	21.4392	0.388057	3.5	3.5	2006.64	0.186588
SNAIL	18.78	0.254381	5.5	3	26.5446	0.978013
SNAIL	18.6097	0.344752	72.5	59.5	2487.99	0.322986
SNAIL	21.851	0.319799	1.5	2.5	3433.17	0.168065
SNAIL	22.1691	0.196782	4	2.5	1829.52	0.27017
SNAIL	13.3512	0.391155	15.5	9.5	1023.66	0.432369
SNAIL	22.1404	0.339116	58.5	53.5	2296.79	0.258139
SNAIL	21.6755	0.216887	6	4.5	1346.72	0.349385
SNAIL	22.5394	0.225368	7.5	4.5	9734.27	0.00513032
SNAIL	16.3907	0.282356	13	8	3008.37	0.217933
SNAIL	19.4461	0.280932	75	44.5	2179.37	0.483893
SNAIL	22.5676	0.316965	7	4	292.826	0.561807
SNAIL	22.3693	0.338042	13	5.5	269.49	0.590761
SNAIL	22.1404	0.273224	10.5	5	1847.85	0.282027
SNAIL	23.48	0.316159	18.5	15.5	6971.62	0.0204227
SNAIL	21.3797	0.246286	9	4	1098.19	0.367376
SNAIL	21.4392	0.216939	18	9.5	187.475	0.830307
SNAIL	25.1302	0.360149	13.5	2	726.445	0.327256
SNAIL	19.7386	0.353335	16	7	139.707	0.791452
SNAIL	19.0826	0.254316	3.5	2	45.2767	0.842056
SNAIL	16.4682	0.262418	15.5	12	1431.78	0.405217
SNAIL	13.2073	0.323907	5	2.5	96.1066	0.707456
SNAIL	19.6091	0.251167	4	3.5	525.623	0.483092
SNAIL	19.1824	0.089816	8.5	4	14075	0.0216568
SNAIL	13.2073	0.241665	8	5.5	645.001	0.501133
SNAIL	21.5872	0.267702	5	3.5	289.925	0.569489
SNAIL	12.8655	0.215858	6.5	4.5	71.6201	0.939358
SNAIL	22.1116	0.456608	12.5	6.5	73.8886	0.825045
SNAIL	20.9891	0.187394	8.5	5.5	274.603	0.690598
SNAIL	25.1302	0.287746	14.5	12	944.597	0.458515
SNAIL	21.2303	0.263578	20	12	1422.99	0.411572
SNAIL	24.6183	0.142848	16.5	12.5	7691.16	0.0178793
SNAIL	21.9962	0.363584	7.5	5	830.897	0.382147
SNAIL	21.6166	0.298324	14.5	10.5	1599.6	0.333866
SNAIL	18.2295	0.506402	13.5	9	1351.56	0.220313
SNAIL	21.4985	0.321957	4.5	2	3294	0.108781
SNAIL	18.2644	0.218795	11	3	9675.1	0.00538916
SNAIL	19.8351	0.210531	27.5	15.5	5913.8	0.133498
SNAIL	21.8801	0.387194	20	13	1356.2	0.34044
SNAIL	20.8674	0.197903	7.5	3	2342.36	0.268004
SNAIL	24.6442	0.38114	26	9	1998.2	0.204074
SNAIL	24.9777	0.431885	16.5	14	1540.57	0.254578
SNAIL	19.9949	0.213925	10	6	6061.17	0.130157
SNAIL	21.0194	0.295772	21	11	1001.6	0.448291
SNAIL	17.4443	0.229335	13.5	6.5	1933.09	0.312156
SNAIL	13.3988	0.525953	44.5	34.5	349.917	0.808455
SNAIL	14.5381	0.265993	11.5	15.5	301.824	0.811204
SNAIL	20.591	0.306805	27	19	2532.69	0.276529
SNAIL	21.4689	0.264218	9.5	6.5	905.939	0.431351
SNAIL	22.8758	0.226793	14	12	811.6	0.53826
SNAIL	20.0267	0.194314	6	2.5	254.063	0.619837
SNAIL	21.4689	0.280816	3.5	2.5	1083.4	0.326986
SNAIL	19.8672	0.212141	11	4	397.408	0.601959
SNAIL	18.8138	0.186909	7	3	56.415	0.889807
SNAIL	13.4934	0.177304	8	4	530.731	0.548096
SNAIL	19.3477	0.168978	13.5	5.5	382.817	0.653451
SNAIL	19.3805	0.177957	4	3.5	410.23	0.575971
SNAIL	16.6985	0.253847	5.5	4.5	8433.58	0.141409
SNAIL	21.9962	0.346473	27	16	1736.35	0.309147
SNAIL	21.7341	0.251779	3	2.5	860.768	0.382707
SNAIL	18.8477	0.230271	15.5	6	1176.88	0.410865
SNAIL	26.0262	0.357457	9.5	10.5	913.775	0.364161
SNAIL	20.7757	0.382927	12.5	5	520.679	0.515087
SNAIL	19.8351	0.244735	11	5.5	118.286	0.811924
SNAIL	22.0251	0.287746	27	23.5	2231.07	0.350107
SNAIL	15.5945	0.151104	11.5	4.5	1620.57	0.363619
SNAIL	16.9257	0.374746	14.5	6	2912.37	0.253937
SNAIL	20.7757	0.569553	22	2	55.8111	0.66306
SNAIL	20.5291	0.181243	12	6	1337.25	0.39608
SNAIL	21.3201	0.510578	10	3	296.095	0.460542
SNAIL	21.1402	0.24093	6	4	5679.2	0.075617
SNAIL	20.3108	0.393126	15	6	785.513	0.402587
SNAIL	21.4689	0.34803	8.5	5.5	295.946	0.572259
SNAIL	25.2061	0.377392	215	175	4226.65	0.206975
SNAIL	19.9311	0.180304	14	6	462.733	0.587449
SNAIL	20.4046	0.257051	30	8	1876.8	0.364231
SNAIL	22.0251	0.302782	10	7.5	446.393	0.536084
SNAIL	15.3061	0.274394	12	5	5699.93	0.113726
SNAIL	17.9834	0.164151	13	4	1384.81	0.368841
SNAIL	22.3693	0.344956	4	2.5	89.6723	0.703198
SNAIL	20.9587	0.209449	6.5	4	371.53	0.61948
SNAIL	20.7757	0.232094	7	3	86.0313	0.815291
SNAIL	22.7362	0.328566	12.5	7.5	1042.24	0.388335
SNAIL	22.9591	0.300061	21	17	2368.73	0.298402
SNAIL	20.8674	0.253899	9.5	3	5307.18	0.0769302
SNAIL	26.8924	0.210941	9	3.5	2181.45	0.239748
SNAIL	20.248	0.252233	8	4	118.834	0.767932
SNAIL	18.4379	0.343838	11.5	6	243.5	0.658105
SNAIL	17.5172	0.181581	12.5	6	7817.48	0.113533
SNAIL	21.9962	0.389545	24	20	1073.79	0.418855
SNAIL	23.9897	0.353941	22.5	12	180.486	0.82914
SNAIL	20.7143	0.317643	10	6	675.818	0.442707
SNAIL	19.116	0.22411	11.5	4	1110.22	0.392385
SNAIL	21.6755	0.69541	19	5.5	1078.71	0.223088
SNAIL	20.9891	0.336099	12.5	7.5	205.876	0.677247
SNAIL	26.0262	0.414683	33	34.5	2309.26	0.22591
SNAIL	19.674	0.198089	8.5	2.5	257.212	0.613795
SNAIL	24.5147	0.491836	28.5	23.5	829.502	0.425919
SNAIL	22.7642	0.242291	18	7	843.398	0.47906
SNAIL	14.2283	0.408132	140	84	3448.19	0.164699
SNAIL	20.3421	0.278623	18	12.5	2033.1	0.30312
SNAIL	20.9891	0.196752	16.5	7	520.347	0.588627
SNAIL	22.5958	0.375604	44	33	1275.47	0.419696
SNAIL	20.4046	0.295792	57.5	28.5	8419.88	0.138054
SNAIL	19.9311	0.208167	4	2	173.961	0.648951
SNAIL	19.5767	0.155428	9	4	2690.24	0.253624
SNAIL	21.0496	0.318292	19.5	13	342.232	0.692927
SNAIL	20.2795	0.197208	11	7	3063.15	0.298191
SNAIL	20.0902	0.280074	15.5	10.5	998.884	0.447414
SNAIL	19.2487	0.275574	10	4	369.883	0.546082
SNAIL	19.7386	0.166328	21	12.5	607.231	0.605507
SNAIL	24.2273	0.475776	17	15.5	1627.07	0.241886
SNAIL	21.4392	0.23604	9.5	5.5	68.619	0.921418
SNAIL	20.1851	0.151683	8	4	1708.39	0.362659
SNAIL	19.8351	0.351215	18.5	9	77.7024	0.930142
SNAIL	22.8758	0.386196	10.5	12	266.206	0.690044
SNAIL	14.7555	0.267368	10	3	280.48	0.497721
SNAIL	20.745	0.203201	22.5	16.5	2392.07	0.376104
SNAIL	15.8777	0.264928	62	18.5	671.105	0.604091
SNAIL	13.9116	0.422658	9.5	8.5	324.635	0.57959
SNAIL	20.4358	0.307064	37	8	3177.72	0.139901
SNAIL	26.845	0.232094	3	3	228.675	0.600866
SNAIL	20.3108	0.331121	35	14.5	159.157	0.890502
SNAIL	17.0755	0.251983	31.5	5.5	290.575	0.623222
SNAIL	20.0902	0.282017	34.5	21.5	633.29	0.650585
SNAIL	21.6166	0.30368	27	20.5	452.156	0.673936
SNAIL	25.7063	0.5574	11	11	1321.15	0.224816
SNAIL	20.0902	0.25131	14.5	8	702.042	0.501225
SNAIL	22.2837	0.326972	17.5	12.5	372.993	0.638498
SNAIL	16.2737	0.248601	13	4	88.5208	0.862781
SNAIL	18.9487	0.305075	9	3	98.3995	0.728242
SNAIL	25.0541	0.345539	17	20.5	1523.6	0.3452
SNAIL	19.0158	0.210518	7	2	500.97	0.489152
SNAIL	24.2273	0.405955	3	3	1418.5	0.227995
SNAIL	21.9962	0.289031	16.5	8	562.309	0.540339
SNAIL	22.3408	0.513288	12.5	5.5	30.8741	0.938961
SNAIL	22.3408	0.257243	35.5	20.5	675.887	0.625636
SNAIL	33.7949	0.170736	5	3	3297.99	0.104877
SNAIL	20.4358	0.259781	26	8.5	824.1	0.486936
SNAIL	22.652	0.29739	14.5	13	2282.25	0.237537
SNAIL	10.6451	0.369668	81	91.5	2444.2	0.328033
SNAIL	21.7048	0.297953	66.5	69	2490.15	0.384823
SNAIL	21.2303	0.258858	35	24.5	2060.88	0.363959
SNAIL	13.5405	0.297069	46	34.5	1929.92	0.386141
SNAIL	19.3805	0.339574	7	4	176.248	0.660391
SNAIL	14.6689	0.471052	15.5	10	213.816	0.643645
SNAIL	24.1747	0.246221	3	2	271.383	0.548398
SNAIL	23.5613	0.280774	58	47	2858.46	0.340039
SNAIL	19.3147	0.205073	7	3	693.357	0.461357
SNAIL	20.9891	0.274811	11.5	7	255.973	0.67618
SNAIL	19.9311	0.123862	6.5	2	10413.8	0.0290567
SNAIL	20.6835	0.30708	19	11	266.351	0.692277
SNAIL	21.2902	0.215068	5	2.5	163.618	0.687424
SNAIL	10.1554	0.319665	11.5	9	1048.82	0.374654
SNAIL	20.6219	0.224143	10.5	6	1122.75	0.4172
SNAIL	22.1691	0.45153	7	2	418.461	0.385002
SNAIL	22.8201	0.300308	7	5.5	860.822	0.414936
SNAIL	19.5441	0.296642	6	3.5	39.7782	0.900028
SNAIL	19.6091	0.256479	2	2.5	3986.36	0.118053
SNAIL	16.1559	0.316781	18.5	8.5	8186.46	0.00669807
SNAIL	28.0056	0.313119	8.5	7	1339.87	0.318278
SNAIL	28.8786	0.324208	8.5	7.5	451.155	0.549289
SNAIL	19.7708	0.632619	7	7.5	75.3708	0.776607
SNAIL	22.0828	0.624615	9.5	6.5	155.863	0.59027
SNAIL	24.2798	0.35364	13.5	11	1516.3	0.292759
SNAIL	21.5872	0.265319	9	5.5	654.157	0.482768
SNAIL	18.8477	0.307064	8.5	3	673.623	0.419118
SNAIL	21.6755	0.385228	84	62	2251.1	0.381396
SNAIL	28.546	0.388995	7.5	4	1361.99	0.264358
SNAIL	21.9382	0.345485	9.5	6	984.227	0.369342
SNAIL	20.8979	0.436255	52	25	249.109	0.811865
SNAIL	27.1515	0.398702	15	10.5	2680.68	0.151415
SNAIL	20.2166	0.115668	8.5	2.5	1757.59	0.330596
SNAIL	21.2003	0.209743	4	2	876.163	0.371387
SNAIL	20.2795	0.663696	62	25.5	967.147	0.328209
SNAIL	20.591	0.118722	5	2.5	3111.95	0.238692
SNAIL	21.2003	0.191049	16	10.5	962.232	0.536086
SNAIL	19.7708	0.17591	16	6.5	1775.9	0.36103
SNAIL	19.0492	0.449712	6	2	40.293	0.75941
SNAIL	20.5601	0.319348	16.5	9	1939.4	0.242722
SNAIL	21.2902	0.261484	13.5	7.5	762.277	0.466497
SNAIL	19.0826	0.258882	13.5	6	250.982	0.642214
SNAIL	13.2073	0.467507	67	42	1322.27	0.404877
SNAIL	19.5115	0.283333	11.5	5	37.626	0.962738
SNAIL	18.3687	0.368325	12.5	6	106.691	0.787699
SNAIL	12.7661	0.380009	28.5	7	121.16	0.752624
SNAIL	23.5882	0.680928	63	52.5	610.955	0.635097
SNAIL	22.4545	0.607248	4.5	4	256.574	0.477285
SNAIL	13.5875	0.313265	17	7.5	915.697	0.389591
SNAIL	19.3477	0.358576	32	32.5	3829.22	0.162936
SNAIL	20.1219	0.368325	4	2	13.3394	0.991652
SNAIL	23.3713	0.275218	9.5	8	767.952	0.454026
SNAIL	19.6091	0.369745	6	3	316.22	0.494456
SNAIL	22.0828	0.503181	10	7.5	267.537	0.552729
SNAIL	20.9891	0.323544	20	14	1546.81	0.315023
SNAIL	19.1824	0.0741524	17.5	6.5	213.876	0.739264
SNAIL	20.4046	0.213178	10.5	4	355.283	0.623664
SNAIL	20.0902	0.281317	5	2	48.2536	0.809712
SNAIL	21.7634	0.398929	30.5	27	2404.42	0.253493
SNAIL	20.7143	0.367509	4	4.5	137.037	0.683488
SNAIL	23.7764	0.501741	10	6	887.259	0.303308
SNAIL	22.0828	0.189376	8	5	1633.27	0.330637
SNAIL	14.9696	0.257706	32.5	14	461.412	0.660093
SNAIL	24.4366	0.289654	16.5	16.5	2465.91	0.250547
SNAIL	18.8138	0.585255	4	7	1798.28	0.16017
SNAIL	22.1116	0.203201	6.5	4	913.968	0.424392
SNAIL	20.8674	0.37048	7	3.5	156.995	0.62689
SNAIL	22.4545	0.300596	21	18	1881.1	0.309
SNAIL	20.0585	0.240239	12	4.5	936.862	0.421377
SNAIL	25.1048	0.319757	21	4.5	1263.5	0.290975
SNAIL	22.8758	0.257192	6	2.5	818.645	0.388084
SNAIL	21.4689	0.177046	4	3	5641.39	0.124381
SNAIL	19.5767	0.245962	8.5	4.5	333.144	0.555227
SNAIL	22.8201	0.342033	8	6	417.975	0.541898
SNAIL	19.1824	0.308656	7.5	2.5	510.809	0.441934
SNAIL	17.948	0.433204	53.5	39	1074.25	0.450042
SNAIL	19.1492	0.309571	11.5	5	874.802	0.414915
SNAIL	27.9601	0.243886	44	32.5	2316.48	0.407879
SNAIL	24.0162	0.220959	22.5	16.5	2097.1	0.354594
SNAIL	22.1116	0.264105	7.5	3.5	392.604	0.54667
SNAIL	22.1404	0.249064	6	3.5	447.042	0.504824
SNAIL	19.8672	0.249549	7	2.5	1025.58	0.371597
SNAIL	16.5837	0.521489	5.5	4	87.6504	0.679279
SNAIL	22.5958	0.327215	6	7	933.971	0.347108
SNAIL	23.5342	0.156976	19.5	16	2287.46	0.395605
SNAIL	23.0973	0.221252	15	8	2291.73	0.324725
SNAIL	12.5143	0.32275	33	32.5	1936.11	0.34361
SNAIL	17.4808	0.209607	5.5	2	300.314	0.56624
SNAIL	22.2837	0.307491	32.5	23	1889.07	0.380163
SNAIL	14.9696	0.49097	32	25.5	1609.6	0.285872
SNAIL	17.1499	0.266748	20.5	6	121.39	0.869875
SNAIL	11.8882	0.34781	27.5	30.5	1790.09	0.351981
SNAIL	14.1835	0.525953	33.5	22	1447.71	0.311395
SNAIL	26.5109	0.531198	9	7	508.766	0.378886
SNAIL	18.1946	0.551952	26.5	21	1409.76	0.251526
SNAIL	19.6416	0.352728	11	5	325.663	0.558998
SNAIL	18.678	0.157993	14	6.5	1736.27	0.377093
SNAIL	23.7228	0.297454	4.5	2	397.454	0.385779
SNAIL	23.0421	0.601241	53.5	35	2088.53	0.138402
SNAIL	21.9962	0.482167	22.5	10	827.448	0.349671
SNAIL	19.6091	0.479227	8	3	50.6865	0.770946
SNAIL	15.5127	0.261484	14.5	2	36.5352	0.866201
SNAIL	19.3805	0.336429	23	11	1571.19	0.309126
SNAIL	13.7273	0.264977	37	20.5	3905.69	0.228055
SNAIL	21.7048	0.191522	117.5	89	4935.41	0.333243
SNAIL	21.851	0.227772	24	11	1041.87	0.523562
SNAIL	21.9382	0.382844	34	30	2318.36	0.238544
SNAIL	31.2298	0.368137	11.5	10	816.877	0.414577
SNAIL	21.4095	0.274052	10	6	97.2527	0.81318
SNAIL	22.0251	0.256386	24	16.5	2573.5	0.318078
SNAIL	17.3712	0.349622	9	5	1346.57	0.295789
SNAIL	18.9487	0.205073	12	7	223.308	0.771833
SNAIL	18.8138	0.170124	6.5	3.5	4937.45	0.155691
SNAIL	19.1824	0.298682	6	3	2514.99	0.169519
SNAIL	24.6442	0.491521	13	9	572.3	0.460135
SNAIL	15.5945	0.177388	4.5	3	757.06	0.449149
SNAIL	13.0131	0.303794	2	4.5	605.099	0.437241
SNAIL	20.2795	0.202108	16.5	9	267.905	0.787363
SNAIL	20.745	0.365105	14.5	10	745.957	0.434738
SNAIL	25.0287	0.306702	12	9.5	577.314	0.5296
SNAIL	18.0541	0.588565	4.5	2	187.849	0.473378
SNAIL	17.4443	0.430949	16.5	11	565.576	0.47666
SNAIL	24.4627	0.268008	10	2	102.283	0.682849
SNAIL	23.3441	0.341566	33	33.5	2007.13	0.333258
SNAIL	26.1482	0.422326	59	53	3072.24	0.148888
SNAIL	24.67	0.322545	17	15.5	946.208	0.465839
SNAIL	19.4788	0.305046	7	4	222.718	0.604526
SNAIL	22.5676	0.448725	20	17	1356.03	0.317319
SNAIL	22.4261	0.479356	53.5	19.5	1575.01	0.273031
SNAIL	22.4828	0.385115	18.5	10	472.496	0.508297
SNAIL	21.0194	0.627793	14	9	698.72	0.334197
SNAIL	26.2939	0.355949	305.5	152.5	3485.96	0.265989
SNAIL	23.6422	0.417477	14	5.5	85.5287	0.799815
SNAIL	21.851	0.198672	13.5	3.5	577.88	0.530366
SNAIL	22.4545	0.399134	72	56.5	1883.37	0.410824
SNAIL	14.7986	0.239201	6	2	786.989	0.428163
SNAIL	21.5872	0.34443	11	6	95.3104	0.79249
SNAIL	18.678	0.446322	26	37	3368.62	0.112321
SNAIL	18.6097	0.188154	6.5	3	321.694	0.615669
SNAIL	22.3693	0.244449	54	23.5	442.385	0.789682
SNAIL	21.11	0.27931	8	5	239.877	0.665821
SNAIL	23.0698	0.344842	35	32.5	1410.92	0.358445
SNAIL	21.851	0.339557	10.5	6.5	853.02	0.399514
SNAIL	21.4095	0.179786	9	2.5	70.7771	0.780456
SNAIL	13.5875	0.449317	6.5	2.5	32.3383	0.837935
SNAIL	21.9672	0.226905	12.5	13	3130.81	0.199553
SNAIL	19.8351	0.278282	8	5.5	315.835	0.610223
SNAIL	20.1851	0.338087	6.5	2.5	2764.84	0.143458
SNAIL	21.6166	0.417625	20.5	14.5	427.468	0.584311
SNAIL	27.7545	0.158488	18.5	11.5	914.708	0.554655
SNAIL	24.0427	0.41912	67	70	2097.21	0.298912
SNAIL	21.9962	0.393909	16	13	646.159	0.483914
SNAIL	20.498	0.200744	7.5	4	71.5215	0.901294
SNAIL	19.7386	0.200854	22.5	10	4127.41	0.15236
SNAIL	18.678	0.223911	22	8.5	3099.15	0.209901
SNAIL	21.4392	0.170508	6	2.5	2296.21	0.110035
SNAIL	19.4788	0.193139	42	28.5	3896.85	0.243486
SNAIL	21.2303	0.259781	11	5.5	1231.55	0.373946
SNAIL	20.3734	0.27675	12.5	6	1150.74	0.367354
SNAIL	22.9036	0.414252	58.5	52.5	2616.13	0.224486
SNAIL	17.224	0.276274	13.5	11	7983.03	0.0183537
SNAIL	20.6835	0.300033	36.5	19.5	557.541	0.649621
SNAIL	19.7386	0.282094	18.5	9.5	246.103	0.688955
SNAIL	18.0188	0.335059	65	64.5	3633.54	0.244135
SNAIL	21.7048	0.525152	15	8	597.274	0.389693
SNAIL	21.6166	0.404469	41.5	34	1616.1	0.326001
SNAIL	20.5601	0.313007	11	5	1216.39	0.305028
SNAIL	22.7362	0.327899	12	7	5998.83	0.015884
SNAIL	21.4985	0.361316	15.5	9.5	316.6	0.63401
SNAIL	13.4934	0.278406	4	2.5	646.044	0.399794
SNAIL	15.3476	0.208494	9	5.5	1257.5	0.401735
SNAIL	21.11	0.431935	17.5	9.5	66.0336	0.915887
SNAIL	15.6759	0.250106	8	5	981.728	0.41186
SNAIL	18.4033	0.280186	7.5	3	798.406	0.395188
SNAIL	13.6809	0.335746	7.5	6	203.547	0.699365
SNAIL	22.0251	0.234926	12	7.5	1225.55	0.410379
SNAIL	13.0619	0.296126	16.5	7	60.5212	0.999444
SNAIL	26.5829	0.413321	81	77	3547.95	0.153902
SNAIL	21.4392	0.598792	33.5	30	2509.53	0.11125
SNAIL	19.5767	0.307137	14.5	7.5	675.754	0.498775
SNAIL	23.1524	0.318292	16	16.5	4930.58	0.0640537
SNAIL	18.0893	0.359569	8.5	6	1743.33	0.229821
SNAIL	23.1249	0.416989	78	42	2100.01	0.272434
SNAIL	18.6439	0.270409	5.5	3	118.793	0.727956
SNAIL	21.3797	0.361666	8.5	5.5	392.02	0.521868
SNAIL	21.6166	0.416092	34	22.5	571.984	0.620652
SNAIL	14.8415	0.390615	63	35.5	1470.8	0.363572
SNAIL	19.1492	0.276445	9	4.5	156.562	0.729545
SNAIL	24.0162	0.400534	47.5	41	2215.93	0.269505
SNAIL	22.7642	0.423617	7.5	5	1007.45	0.298323
SNAIL	16.3907	0.348942	8.5	4	204.223	0.611817
SNAIL	21.4689	0.291264	16.5	12.5	1174.54	0.41502
SNAIL	24.6958	0.254958	27	9	1207.62	0.405244
SNAIL	22.1116	0.365093	11.5	7.5	417.436	0.503195
SNAIL	21.3499	0.315353	4	2.5	111.54	0.697999
SNAIL	22.0251	0.441659	6.5	14	421.455	0.531397
SNAIL	19.2817	0.287663	6	2.5	229.801	0.564783
SNAIL	19.9631	0.247272	5	3.5	490.075	0.507506
SNAIL	20.0902	0.313425	9	5.5	2761.53	0.15898
SNAIL	23.0973	0.55945	2	2.5	56.2405	0.708521
SNAIL	24.3845	0.273685	5	3.5	5838.59	0.0045381
SNAIL	13.2554	0.246829	32	22.5	2864.99	0.303914
SNAIL	21.851	0.34532	53	44	3359.37	0.208583
SNAIL	22.0251	0.243666	23.5	17	3335.21	0.240947
SNAIL	20.1535	0.213481	10	8.5	6743.09	0.123132
SNAIL	21.6755	0.335541	17	10.5	1254.35	0.368393
SNAIL	13.3512	0.324337	3.5	4.5	5210.5	0.026234
SNAIL	23.8566	0.419026	43.5	47.5	3617.71	0.132173
SNAIL	17.9834	0.233306	7.5	2	30.8733	0.930593
SNAIL	25.731	0.484173	12	6	68.3741	0.821198
SNAIL	22.2837	0.440103	113.5	51.5	2936.01	0.199956
SNAIL	18.2295	0.182569	7	3	1496.59	0.332003
SNAIL	18.8814	0.252848	28	14.5	1109.43	0.501347
SNAIL	25.8298	0.308437	18	20.5	3259.88	0.170995
SNAIL	13.6809	0.150324	7	8	6373.96	0.166915
SNAIL	21.7048	0.318737	10.5	6	564.156	0.465559
SNAIL	21.1703	0.302964	17	9.5	1087.57	0.409545
SNAIL	19.6416	0.286157	6	2	220.945	0.56236
SNAIL	20.3108	0.269095	6	4	236.298	0.645683
SNAIL	14.0482	0.237779	3.5	4	5179.55	0.0954462
SNAIL	17.0382	0.270921	15.5	5.5	56.3338	0.990333
SNAIL	19.2487	0.362362	7.5	3	21.9635	0.965944
SNAIL	19.7063	0.182313	5.5	3.5	3195.53	0.174818
SNAIL	20.4358	0.213178	8.5	4.5	2564.35	0.227993
SNAIL	21.4689	0.410809	5	3.5	1232.35	0.262063
SNAIL	20.0267	0.173366	12	5	1474.97	0.384935
SNAIL	21.1703	0.457097	23.5	19	1521.8	0.272366
SNAIL	27.8003	0.526466	12	11	1710.75	0.192024
SNAIL	19.5441	0.252402	4	3	33.1384	0.926024
SNAIL	19.7063	0.13002	13.5	5.5	4681.79	0.186171
SNAIL	24.4627	0.5144	14	21	1107.45	0.341373
SNAIL	18.9151	0.244748	9	2	322.244	0.523309
SNAIL	21.5576	0.357156	15.5	9	1811.3	0.249848
SNAIL	25.4073	0.319671	41.5	49	3091.2	0.223632
SNAIL	20.2166	0.215563	9	6	128.118	0.855419
SNAIL	19.5441	0.205573	7	3.5	432.327	0.569599
SNAIL	20.9283	0.320044	11.5	7.5	972.406	0.39534
SNAIL	24.7473	0.376653	17	17.5	3424.71	0.118571
SNAIL	19.4788	0.400731	10.5	4.5	202.059	0.622202
SNAIL	18.2295	0.231597	9	4	328.168	0.597966
SNAIL	21.3797	0.242987	11.5	6	1015.35	0.440153
SNAIL	23.2895	0.322144	31.5	28	1777.03	0.402614
SNAIL	24.4627	0.206847	5.5	4	312.906	0.546985
SNAIL	27.2919	0.510398	7.5	17	2988.41	0.111265
SNAIL	20.8979	0.362986	6.5	2.5	819.254	0.307506
SNAIL	18.6439	0.109122	10.5	5	1665.8	0.198547
SNAIL	25.731	0.168503	14	11.5	444.651	0.589457
SNAIL	16.8503	0.370012	18.5	10.5	521.593	0.496337
SNAIL	24.773	0.33635	21	18.5	4037.38	0.151137
SNAIL	14.4062	0.22734	9	5	161.716	0.765779
SNAIL	23.2621	0.390211	24	25	2572.68	0.184199
SNAIL	20.4046	0.575167	4	3.5	203.895	0.506378
SNAIL	23.4529	0.291031	18	16	2269.85	0.264567
SNAIL	20.7143	0.244061	17.5	12	1161.73	0.453492
SNAIL	19.4134	0.212144	7.5	2.5	4820.69	0.118278
SNAIL	18.9487	0.232297	6	3.5	458.028	0.534147
SNAIL	20.4046	0.284922	37.5	20.5	1811.3	0.386294
SNAIL	22.6239	0.235774	3	2.5	1223.74	0.314633
SNAIL	19.5767	0.269493	16.5	10.5	360.148	0.650155
SNAIL	20.9587	0.520817	9	5.5	26.6272	0.928281
SNAIL	20.5291	0.227991	9.5	4.5	726.364	0.442325
SNAIL	14.2283	0.298909	5.5	6	3538.04	0.18409
SNAIL	16.8125	0.261354	11	2.5	118.434	0.727776
SNAIL	27.2685	0.748182	21.5	19.5	1599.71	0.159769
SNAIL	34.7973	0.536714	1813.5	1163	4337.88	0.132974
SNAIL	22.4828	0.411972	6.5	4	869.336	0.329095
SNAIL	21.5281	0.387346	13.5	8	1501.43	0.284483
SNAIL	23.7228	0.365692	88.5	43.5	585.66	0.770422
SNAIL	18.1244	0.347541	6.5	3	1758.79	0.28111
SNAIL	20.1851	0.260161	32.5	15.5	142.465	0.954216
SNAIL	18.9151	0.243891	9	5.5	2101.97	0.225597
SNAIL	28.6795	0.578346	29	26	1513.43	0.277958
SNAIL	19.5115	0.371153	18.5	8	208.293	0.688229
SNAIL	21.11	0.315798	10.5	6	274.279	0.642917
SNAIL	25.5572	0.432024	200.5	158	4537.85	0.04805
SNAIL	12.666	0.278935	15	9.5	432.546	0.63283
SNAIL	25.3823	0.303291	14	7.5	2044.17	0.224709
SNAIL	21.2303	0.243777	8	3	772.869	0.421255
SNAIL	17.6619	0.489917	2271.5	1633.5	4803.42	0.136917
SNAIL	18.78	0.259602	6	3	2823.25	0.188217
SNAIL	13.5875	0.354597	93.5	83.5	1400.75	0.522008
SNAIL	23.3713	0.313294	41.5	13.5	5500.15	0.0458764
SNAIL	21.5872	0.220913	10	5	1502.86	0.357258
SNAIL	16.5453	0.202566	4	3.5	1609.77	0.302514
SNAIL	19.9949	0.212141	6	2.5	574.794	0.482827
SNAIL	25.2313	0.410692	9.5	13	2247.69	0.150961
SNAIL	26.5829	0.377061	8	3.5	3485.25	0.086249
SNAIL	25.731	0.534809	5	14	410.809	0.496125
SNAIL	14.7986	0.248631	8.5	2.5	484.002	0.461717
SNAIL	17.4078	0.299376	11	8.5	1301.01	0.421676
SNAIL	18.678	0.491558	8	10	499.175	0.478169
SNAIL	21.4095	0.37048	4.5	2.5	358.717	0.465001
SNAIL	23.48	0.251718	25	18.5	2326.82	0.291023
SNAIL	13.6343	0.415879	10.5	5	220.501	0.590848
SNAIL	18.3687	0.31072	4	2	320.672	0.508326
SNAIL	22.5958	0.217743	4.5	2.5	2008.16	0.280261
SNAIL	21.6461	0.37988	9	6	255.234	0.58803
SNAIL	18.9823	0.322545	6.5	3	59.8689	0.821869
SNAIL	20.8369	0.282746	6.5	4.5	1272.53	0.33476
SNAIL	20.8369	0.127059	11	6	1492.42	0.383601
SNAIL	21.11	0.34733	20	10	629.376	0.511277
SNAIL	21.4095	0.217601	40.5	21	902.501	0.505431
SNAIL	19.803	0.229784	52	40.5	4306.96	0.263127
SNAIL	19.5767	0.27931	6	2.5	142.034	0.661401
SNAIL	18.4724	0.180482	6.5	3	4589.34	0.156609
SNAIL	24.0956	0.458716	59.5	48	1765.73	0.304998
SNAIL	19.7386	0.208389	7	2.5	7678.17	0.0248464
SNAIL	13.2554	0.320044	14.5	10	1263.07	0.3451
SNAIL	21.6755	0.234564	7	4.5	1627.8	0.289546
SNAIL	19.7386	0.303819	15	10.5	1060.14	0.378279
SNAIL	17.5897	0.498869	60	30.5	2849.77	0.133999
SNAIL	15.7973	0.235522	8.5	2	957.177	0.335816
SNAIL	26.0262	0.399712	2029	388.5	4515.74	0.0830228
SNAIL	21.9672	0.525771	11.5	7.5	347.463	0.489647
SNAIL	19.4461	0.028364	12	6.5	5583.65	0.17883
SNAIL	19.7386	0.259142	8	4	252.112	0.614659
SNAIL	21.8218	0.230379	20.5	15.5	801.173	0.591963
SNAIL	22.4828	0.438321	8	4.5	876.551	0.330114
SNAIL	19.5767	0.534907	9.5	5	293.581	0.484987
SNAIL	22.4261	0.360533	25.5	20	2438.76	0.217862
SNAIL	20.0267	0.248601	8.5	3.5	734.038	0.406925
SNAIL	19.8992	0.296078	27	11	2309.39	0.232487
SNAIL	12.9149	0.432276	4	2	99.6308	0.619861
SNAIL	26.5349	0.384848	27	5.5	117.511	0.775181
SNAIL	21.0496	0.206741	28	16.5	830.441	0.643439
SNAIL	22.0828	0.586753	11.5	2.5	13.2697	0.916865
SNAIL	19.4134	0.180482	7	3.5	1187.17	0.376317
SNAIL	15.6759	0.312759	191	2	1157.76	0.287565
SNAIL	13.3512	0.337367	14	10	476.611	0.552089
SNAIL	18.2992	0.217503	6	2.5	73.5359	0.822501
SNAIL	19.2156	0.186909	6	3.5	88.1702	0.83509
SNAIL	19.7708	0.285343	6.5	2.5	874.701	0.369836
SNAIL	19.5115	0.192314	8.5	3.5	4469.54	0.136193
SNAIL	20.4046	0.343226	8.5	4.5	276.354	0.571983
SNAIL	18.8814	0.423557	13.5	7.5	156.113	0.737873
SNAIL	21.6166	0.277566	29	13	690.076	0.485682
SNAIL	21.1703	0.477016	704	338	4149.92	0.156227
SNAIL	21.4095	0.282356	19	15.5	2317.42	0.286619
SNAIL	19.4788	0.265594	7.5	4	352.546	0.576763
SNAIL	20.1219	0.266748	8	3	390.115	0.545438
SNAIL	25.0287	0.410692	332	153	2680.42	0.266223
SNAIL	12.9149	0.399088	9.5	7	4268.72	0.0659045
SNAIL	17.0008	0.244581	4	2.5	44.3384	0.887306
SNAIL	19.2156	0.275854	4.5	3	123.153	0.691669
SNAIL	16.9633	0.2392	8	3.5	62.5295	0.912539
SNAIL	21.5576	0.318439	20.5	11	1276.28	0.3723
SNAIL	19.7386	0.339557	23	16	577.007	0.527077
SNAIL	14.6255	0.285343	4.5	2	879.888	0.334918
SNAIL	22.4261	0.316781	133.5	124.5	4479.29	0.219107
SNAIL	23.0973	0.466882	7	4.5	489.104	0.443592
SNAIL	13.2554	0.182313	6	3.5	965.438	0.447788
SNAIL	15.0121	0.306805	22	11.5	991.422	0.397654
SNAIL	6.28255	0.323047	11.5	13	160.166	0.828229
SNAIL	24.7473	0.446992	6.5	4.5	1347.32	0.236512
SNAIL	19.0492	0.294746	7	3	27.4222	0.968056
SNAIL	28.8565	0.295691	9	11	7081.51	0.050049
SNAIL	25.7804	0.420163	6.5	6.5	291.245	0.524906
SNAIL	20.498	0.158843	18	12.5	2013.31	0.383399
SNAIL	22.8758	0.316965	13	9	632.674	0.500591
SNAIL	25.9282	0.337153	16.5	12	1086.83	0.385432
SNAIL	24.201	0.32581	20	12.5	553.502	0.552099
SNAIL	20.3421	0.368574	5.5	3.5	110.339	0.693117
SNAIL	21.6166	0.267978	7	5	348.937	0.570046
SNAIL	20.3108	0.325075	8.5	4	63.4546	0.794805
SNAIL	19.1492	0.357385	11	4.5	135.102	0.724387
SNAIL	20.6527	0.217761	15	9	2319.52	0.28778
SNAIL	21.2902	0.326225	16	13	592.412	0.505107
SNAIL	23.1249	0.380136	23	19.5	1610.61	0.272723
SNAIL	21.4689	0.206151	10	13.5	1502.38	0.394681
SNAIL	12.2573	0.399134	6	5	127.415	0.694583
SNAIL	22.1978	0.416649	8	5.5	101.081	0.722717
SNAIL	18.1595	0.197067	13.5	3	415.276	0.543091
SNAIL	22.5958	0.3708	9	7	1260.42	0.307895
SNAIL	19.7063	0.16002	6.5	4	3987.94	0.183883
SNAIL	13.4934	0.43021	19.5	6	591.942	0.432021
SNAIL	25.0032	0.280932	7.5	5	3188.93	0.211116
SNAIL	24.0427	0.366234	11	11	1024.53	0.379472
SNAIL	24.6442	0.55269	911	692	4142.86	0.194121
SNAIL	21.1703	0.35987	13.5	10	899.155	0.44944
SNAIL	20.3734	0.361993	35.5	25.5	3746.2	0.191336
SNAIL	20.6219	0.386487	15	9	1645.82	0.250126
SNAIL	19.6091	0.452519	984	756.5	6448.09	0.193842
SNAIL	20.8063	0.23328	7	4.5	3848.9	0.16429
SNAIL	13.9116	0.27931	16	7.5	203.369	0.718366
SNAIL	22.7642	0.326223	7.5	5.5	1299.72	0.316941
SNAIL	23.0145	0.252402	23	16.5	10184.3	0.0146556
SNAIL	29.3595	0.253899	13	11	1043.97	0.461063
SNAIL	17.0755	0.388614	24.5	21.5	1965.96	0.274287
SNAIL	21.4689	0.223379	21.5	12	1077.11	0.507432
SNAIL	23.3713	0.296964	21.5	18.5	1872.68	0.344435
SNAIL	20.0585	0.236182	6	3	110.613	0.749282
SNAIL	14.5819	0.325575	53.5	41.5	3554.14	0.209634
SNAIL	19.4134	0.304337	8	7	1320.19	0.315803
SNAIL	20.2166	0.26044	11	6.5	1017.14	0.422494
SNAIL	22.9036	0.522772	9.5	5.5	1017.49	0.267918
SNAIL	18.1595	0.184179	13.5	7.5	799.761	0.534751
SNAIL	23.3168	0.606972	87.5	64.5	1985.36	0.286676
SNAIL	26.2939	0.525301	315	297	3177.34	0.171261
SNAIL	22.2265	0.360688	13.5	8	212.155	0.669078
SNAIL	23.8299	0.32275	14.5	13.5	1258.22	0.394289
SNAIL	14.0935	0.234472	12.5	7.5	478.99	0.624323
SNAIL	24.9522	0.492863	145.5	124.5	3042.55	0.191556
SNAIL	13.5875	0.193892	13.5	6.5	1053.02	0.354525
SNAIL	13.7273	0.261877	11.5	5	609.992	0.501318
SNAIL	17.224	0.340078	14.5	12.5	1284.88	0.351719
SNAIL	15.2644	0.300308	51.5	40.5	2882.92	0.296978
SNAIL	14.7123	0.677308	6	5	971.377	0.316459
SNAIL	22.7642	0.264696	9.5	4.5	728.349	0.424721
SNAIL	17.5172	0.274398	10.5	4	1449.2	0.326067
SNAIL	19.9949	0.381783	27.5	15.5	2100.24	0.292892
SNAIL	19.5767	0.377392	10.5	3	596.166	0.374221
SNAIL	15.389	0.391424	29.5	18	1672.88	0.332941
SNAIL	21.4689	0.278366	10	5.5	998.09	0.401112
SNAIL	16.1165	0.427853	21.5	2	610.112	0.322406
SNAIL	22.5958	0.328228	28	24	1249.32	0.466055
SNAIL	14.5819	0.177654	10	4.5	242.63	0.687911
SNAIL	24.1747	0.391155	14.5	10	2749.25	0.14014
SNAIL	18.4724	0.32116	15	3.5	46.1828	0.879808
SNAIL	13.7736	0.285732	7.5	3.5	137.458	0.674287
SNAIL	19.3805	0.384303	27.5	14.5	919.628	0.451596
SNAIL	27.6395	0.523037	7	4.5	1625.56	0.257353
SNAIL	23.2347	0.380515	38	26	1741.39	0.353197
SNAIL	22.5394	0.281301	8.5	5.5	3087.84	0.203558
SNAIL	27.6856	0.20877	4	9	1907.29	0.348889
SNAIL	18.746	0.262257	13	8	511.29	0.598957
SNAIL	22.7642	0.341943	27	14.5	2513.01	0.20907
SNAIL	21.9092	0.395344	8.5	6.5	2295.54	0.115132
SNAIL	20.9891	0.537483	13	4.5	285.556	0.467892
SNAIL	19.3477	0.661334	22.5	15	1068.39	0.274428
SNAIL	13.7736	0.135792	66	45.5	4930.49	0.28898
SNAIL	24.4366	0.338799	13.5	9	1716.85	0.264618
SNAIL	24.4106	0.422161	14	15.5	3988.19	0.0713149
SNAIL	20.2166	0.298682	110.5	90	1293.15	0.522947
SNAIL	19.9311	0.298089	21	12.5	162.013	0.81676
SNAIL	22.3122	0.635216	6	5	796.829	0.310446
SNAIL	23.9099	0.395344	18	11.5	2615.54	0.189642
SNAIL	21.4095	0.233592	12.5	6	465.094	0.594106
SNAIL	21.1402	0.432124	9	4	78.7939	0.734164
SNAIL	20.6219	0.125317	27	17	7406.61	0.214322
SNAIL	17.0755	0.262152	25.5	10	6959.87	0.0575949
SNAIL	12.4634	0.421735	7	6	213.252	0.638294
SNAIL	12.9641	0.260161	310.5	8.5	95.7669	0.928604
SNAIL	14.4943	0.263109	10	4	3816.54	0.314257
SNAIL	22.1978	0.471707	10.5	7.5	660.27	0.380165
SNAIL	20.3421	0.574515	10	3.5	526.43	0.350783
SNAIL	19.116	0.289648	7	3.5	284.075	0.59758
SNAIL	20.591	0.215068	11.5	4.5	469.592	0.577269
SNAIL	18.2992	0.327104	329	3.5	1243.8	0.304429
SNAIL	26.7262	0.460581	35.5	38	1546.54	0.331436
SNAIL	28.367	0.365513	39	8	3758.23	0.0789114
SNAIL	22.1116	0.294989	13.5	2.5	564.654	0.397563
SNAIL	16.5068	0.504824	20	12	1237.92	0.288665
SNAIL	21.7048	0.266493	5.5	3.5	875.726	0.400251
SNAIL	18.0893	0.161262	8.5	2.5	1308.05	0.338373
SNAIL	19.1824	0.204448	6.5	3	257.651	0.606815
SNAIL	21.3797	0.427948	33.5	22.5	1945.02	0.21909
SNAIL	14.6689	0.231912	21.5	6	605.638	0.493834
SNAIL	18.5412	0.211575	5	2	2605.61	0.224266
SNAIL	23.9365	0.393126	230	79	4057.45	0.125405
SNAIL	21.6755	0.275236	9.5	6	816.622	0.411589
SNAIL	20.4669	0.68379	11.5	14	2089.62	0.0906258
SNAIL	24.3584	0.248303	25.5	16	783.439	0.513126
SNAIL	20.9283	0.313119	16.5	8.5	175.235	0.688603
SNAIL	30.2144	0.353245	2	8.5	4510.49	0.0693044
SNAIL	23.2347	0.639138	3.5	2	153.882	0.487455
SNAIL	22.8479	0.339045	10.5	6	3486.38	0.108692
SNAIL	21.5872	0.29739	48.5	36	2759.78	0.251025
SNAIL	15.5945	0.374441	18	9	897.947	0.37144
SNAIL	11.3401	0.362003	61	36.5	1395.93	0.399244
SNAIL	19.5767	0.502525	12.5	10.5	473.618	0.493786
SNAIL	25.2565	0.415761	16	10	848.046	0.39651
SNAIL	22.7362	0.278501	37	29.5	2282.99	0.349807
SNAIL	26.0262	0.39035	68.5	60	2311.7	0.28067
SNAIL	21.2902	0.322785	40.5	27.5	2786.63	0.238172
SNAIL	21.6166	0.362462	16	7.5	238.214	0.650963
SNAIL	28.9006	0.384785	28.5	22.5	4924.31	0.0531203
SNAIL	19.5441	0.346322	12	7	1172.24	0.359213
SNAIL	22.7362	0.246286	21	13	1083.7	0.488222
SNAIL	19.116	0.282094	64	31	3320.35	0.234111
SNAIL	19.9311	0.369487	16	9.5	240.394	0.668771
SNAIL	20.8063	0.476594	18	5	598.989	0.382098
SNAIL	21.6461	0.198334	19.5	11	7173.39	0.0896918
SNAIL	14.3619	0.305864	4	2	35.5443	0.84548
SNAIL	18.678	0.446417	188	2	628.69	0.325639
SNAIL	14.6255	0.333788	140	125.5	4571.33	0.235992
SNAIL	28.4343	0.38775	35.5	26.5	1600.13	0.358393
SNAIL	15.2227	0.30495	36.5	27	3029.22	0.231404
SNAIL	21.1402	0.301225	22	16.5	286.576	0.76561
SNAIL	17.8769	0.200606	13.5	4.5	11025.2	0.0176753
SNAIL	18.5412	0.247272	21.5	4.5	364.478	0.582067
SNAIL	16.1559	0.34792	24.5	19	1684.92	0.3009
SNAIL	19.8672	0.329399	39	22	1438.76	0.416781
SNAIL	14.8843	0.343204	7	3	5163.4	0.0176626
SNAIL	13.7736	0.248004	7	2	1087.83	0.324518
SNAIL	21.0496	0.442552	26	13.5	1628.54	0.255079
SNAIL	20.248	0.256386	10	4.5	300.396	0.588486
SNAIL	17.8412	0.18494	14.5	7	9121.57	0.0878865
SNAIL	13.9116	0.431521	35	40.5	2346.03	0.235807
SNAIL	14.4062	0.295138	14.5	6.5	878.58	0.404595
SNAIL	17.948	0.25229	10.5	3.5	55.5383	0.916392
SNAIL	18.746	0.237235	8.5	2.5	118.18	0.713929
SNAIL	23.3441	0.335696	11	4	246.185	0.590289
SNAIL	22.5394	0.3311	19	12	580.438	0.471552
SNAIL	15.5536	0.344116	24	20	762.565	0.533039
SNAIL	17.7697	0.241279	20	13.5	490.103	0.618752
SNAIL	19.6416	0.268578	5	3	451.076	0.476283
SNAIL	16.9633	0.609953	11.5	7.5	426.208	0.447364
SNAIL	20.0267	0.360039	18.5	9	1180.95	0.343624
SNAIL	14.0935	0.211218	10	5	1573.71	0.345281
SNAIL	22.1978	0.306766	27	18.5	2943.57	0.228135
SNAIL	16.6985	0.183267	8.5	2	4066.81	0.160816
SNAIL	22.1691	0.285527	14	9.5	3564.92	0.199864
SNAIL	31.0048	0.466475	75	65.5	1473.54	0.455341
SNAIL	20.591	0.361834	6.5	3	18.8008	0.982771
SNAIL	20.9587	0.327059	4.5	3.5	61.3863	0.805103
SNAIL	18.4033	0.242704	31	7	1888.71	0.281753
SNAIL	13.4934	0.235888	5	4.5	948.431	0.423768
SNAIL	19.1824	0.213481	10.5	3	285.952	0.607082
SNAIL	21.6461	0.18182	9	3.5	1322.31	0.361759
SNAIL	24.7473	0.353547	23.5	17.5	792.45	0.487597
SNAIL	18.0188	0.288113	68.5	2	28.0701	0.889984
SNAIL	17.7697	0.266368	9.5	4.5	76.989	0.849388
SNAIL	19.7708	0.51501	6	6	1034.65	0.298667
SNAIL	30.0666	0.43466	5.5	6.5	301.836	0.556797
SNAIL	25.1302	0.119788	57	4.5	1170.31	0.290396
SNAIL	18.9487	0.146605	13	7.5	5843.98	0.114918
SNAIL	16.3907	0.20593	3.5	2.5	239.636	0.623144
SNAIL	26.0751	0.0241774	4.5	3	1135.15	0.254289
SNAIL	19.0492	0.252164	15.5	6	72.9693	0.917725
SNAIL	14.273	0.23028	7.5	4	332.074	0.604449
SNAIL	20.6527	0.357561	9.5	3.5	99.1096	0.760224
SNAIL	24.3845	0.219022	10	2	604.595	0.45268
SNAIL	17.3345	0.299284	25.5	7.5	146.092	0.842827
SNAIL	21.3797	0.220959	9	5.5	525.35	0.565233
SNAIL	16.888	0.307844	7.5	7	674.488	0.449018
SNAIL	15.3061	0.3331	12	7	680.163	0.432665
SNAIL	18.1244	0.395252	10	3.5	135.682	0.649207
SNAIL	18.8477	0.197538	14.5	6	57.9908	0.976423
SNAIL	21.5576	0.368605	17	8.5	695.839	0.451183
SNAIL	10.9981	0.621236	36	27.5	2014.47	0.210642
SNAIL	19.8672	0.286983	6	2.5	473.088	0.505041
SNAIL	15.5127	0.58111	105	19	1244.48	0.251149
SNAIL	18.3687	0.269514	10	4	122.335	0.739174
SNAIL	21.2303	0.305635	17.5	10.5	1642.14	0.313628
SNAIL	13.1591	0.416039	15	7	83.4122	0.809027
SNAIL	19.9631	0.266257	5	2	828.091	0.306856
SNAIL	19.2487	0.258222	12	3.5	281	0.589572
SNAIL	20.1535	0.287663	12	5	419.345	0.556314
SNAIL	17.8055	0.261436	9	3	138.861	0.686747
SNAIL	21.6461	0.291791	11.5	6.5	315.237	0.577585
SNAIL	21.4689	0.409768	2.5	2	1422.83	0.201597
SNAIL	20.8674	0.341025	17.5	9.5	994.358	0.398321
SNAIL	18.6439	0.219302	5.5	2.5	428.234	0.541063
SNAIL	14.8843	0.298842	8.5	5.5	164.841	0.701774
SNAIL	18.6439	0.277724	5	2.5	270.005	0.570468
SNAIL	12.9641	0.249886	59.5	9	1062.27	0.461435
SNAIL	14.4062	0.286868	3.5	3.5	1045.41	0.33996
SNAIL	16.0373	0.220498	12	10	4218.86	0.155952
SNAIL	22.1978	0.393389	10.5	4.5	775.13	0.371277
SNAIL	14.0482	0.272455	8.5	4	662.216	0.467808
SNAIL	22.1691	0.356282	4	2.5	365.769	0.472802
SNAIL	19.9631	0.174982	7	5.5	8920.9	0.0313729
SNAIL	25.1808	0.275939	9.5	6	3258.81	0.152272
SNAIL	20.248	0.204658	10	5	8265.21	0.0599003
SNAIL	18.4379	0.446364	11	4	93.705	0.698247
SNAIL	17.8055	0.219799	8	5	1660.27	0.335905
SNAIL	24.67	0.35263	152	103.5	2865.04	0.334333
SNAIL	17.6619	0.161522	13.5	2	5373.63	0.130784
SNAIL	13.0619	0.223738	8	2.5	292.097	0.554008
SNAIL	18.4724	0.250436	10	5.5	250.867	0.653039
SNAIL	19.2817	0.408129	18	8.5	2086.04	0.217033
SNAIL	15.3061	0.275915	14	10.5	2197.69	0.250814
SNAIL	15.757	0.39605	5.5	2.5	378.921	0.443277
SNAIL	21.0799	0.428617	9.5	2	1284.99	0.249928
SNAIL	21.0194	0.309232	20.5	10.5	811.839	0.46706
SNAIL	29.7259	0.387967	23	18	658.938	0.543196
SNAIL	16.3518	0.179012	15	5.5	794.77	0.522559
SNAIL	26.2212	0.595293	5	2.5	49.7014	0.710636
SNAIL	21.3201	0.214503	22	10	1069.14	0.46496
SNAIL	19.5115	0.179798	7	3.5	1458.61	0.357271
SNAIL	18.5412	0.200205	10	5.5	60.5114	0.983045
SNAIL	21.2003	0.269992	13	6.5	1541.57	0.323144
SNAIL	18.8138	0.404329	25.5	16.5	359.326	0.627652
SNAIL	19.674	0.216939	9.5	7	558.311	0.542558
SNAIL	18.4033	0.317353	26	17	3614.68	0.282323
SNAIL	19.3477	0.296926	5	2.5	53.3069	0.810163
SNAIL	17.4078	0.244735	53.5	6	2216.21	0.266269
SNAIL	16.1165	0.638526	4	3	80.4756	0.708957
SNAIL	19.4461	0.281317	5.5	2.5	111.772	0.700068
SNAIL	15.5127	0.195075	13	6.5	1967.76	0.353682
SNAIL	19.2156	0.169481	17.5	11.5	383.188	0.752927
SNAIL	13.5405	0.436527	40.5	26.5	641.208	0.557568
SNAIL	22.7921	0.401082	35	30	1370.53	0.395407
SNAIL	17.9125	0.182039	9	7	95.8205	0.902896
SNAIL	20.498	0.349081	20	9.5	66.5373	0.950111
SNAIL	21.3201	0.296472	31.5	25.5	1081.71	0.501165
SNAIL	11.0558	0.386494	15	10.5	728.299	0.458243
SNAIL	25.6567	0.22363	11.5	6	287.419	0.602659
SNAIL	13.1106	0.21424	18.5	5	1100.82	0.411442
SNAIL	18.9823	0.196982	6	2.5	151.827	0.695527
SNAIL	25.2061	0.260405	14	8	1480.02	0.351113
SNAIL	17.187	0.326791	17	13	2591.89	0.198904
SNAIL	18.4033	0.358899	42	21.5	2074.9	0.311062
SNAIL	15.0967	0.174982	13.5	5	1751.85	0.352788
SNAIL	16.6221	0.1268	23	5	127.235	0.816548
SNAIL	19.4788	0.209515	19.5	9.5	2275.42	0.287193
SNAIL	15.9577	0.190972	4.5	2	5045.29	0.133442
SNAIL	14.0028	0.243186	15.5	3.5	73.7331	0.852227
SNAIL	19.2156	0.254784	10	5	74.5561	0.885496
SNAIL	8.44402	0.260188	5	2.5	30.7087	0.938429
SNAIL	14.273	0.335957	13	12	1440.77	0.35038
SNAIL	21.2003	0.520146	37.5	28.5	1242.48	0.359147
SNAIL	19.2487	0.218982	6	3	503.877	0.510833
SNAIL	15.0545	0.474553	42.5	31.5	3303.54	0.082059
SNAIL	22.2265	0.517858	20	15	143.112	0.833423
SNAIL	25.879	0.532476	17.5	5.5	103.798	0.680898
SNAIL	19.1824	0.319232	7.5	3.5	391.699	0.531638
SNAIL	20.3108	0.247779	13	6	1136.65	0.385474
SNAIL	19.5441	0.135812	14	5	1833.12	0.383185
SNAIL	24.2798	0.233306	3	2	134.284	0.681201
SNAIL	19.2487	0.227163	12.5	3.5	821.327	0.45275
SNAIL	21.4689	0.422161	11.5	7	636.496	0.408544
SNAIL	17.0755	0.244986	9.5	8	980.28	0.519535
SNAIL	19.7386	0.311392	10.5	5.5	80.0471	0.840932
SNAIL	22.5394	0.322129	8	5.5	651.549	0.437581
SNAIL	13.8198	0.26848	5.5	4	3078.05	0.159536
SNAIL	20.4358	0.378188	7	6.5	626.777	0.418283
SNAIL	22.3977	0.430737	20.5	17	1318.38	0.344643
SNAIL	18.1244	0.333144	13	3.5	269.26	0.5677
SNAIL	18.4379	0.294611	13.5	8.5	558.835	0.532206
SNAIL	18.6097	0.178734	14.5	6.5	3619.95	0.217124
SNAIL	10.2179	0.274063	7.5	10	141.375	0.907831
SNAIL	14.7986	0.338388	19.5	7.5	1121.92	0.286691
SNAIL	12.5651	0.345424	34	14	1837.67	0.284151
SNAIL	22.2551	0.387919	8	6.5	409.181	0.515208
SNAIL	19.9631	0.340354	17	8.5	1604.21	0.2877
SNAIL	18.6097	0.156121	11.5	6.5	848.678	0.537249
SNAIL	17.4078	0.542444	24.5	2.5	26.0809	0.856658
SNAIL	15.3061	0.259007	17	9.5	619.243	0.531932
SNAIL	16.9633	0.17652	5	2.5	577.104	0.512985
SNAIL	18.4724	0.224387	5	3	40.1572	0.94496
SNAIL	13.0619	0.164151	12.5	5	373.655	0.640873
SNAIL	14.5381	0.372243	15	11	486.516	0.530564
SNAIL	18.8477	0.221407	8	4	1370.43	0.402386
SNAIL	19.5441	0.427861	24	16.5	1776.41	0.270146
SNAIL	11.6174	0.219302	12.5	2.5	99.3976	0.745125
SNAIL	18.9823	0.259864	12.5	3.5	258.325	0.624587
SNAIL	14.5819	0.389916	15	17.5	4096.56	0.0403799
SNAIL	26.3423	0.360334	52.5	47.5	2260.18	0.305427
SNAIL	18.4379	0.242821	8	4	457.954	0.523246
SNAIL	21.4689	0.396555	27	34.5	2194.27	0.254657
SNAIL	21.0194	0.272216	23.5	16.5	1915.42	0.335984
SNAIL	20.0585	0.244748	10	4.5	434.383	0.544208
SNAIL	16.9633	0.143289	10.5	2	7606.69	0.0805464
SNAIL	21.9092	0.381653	28.5	22	1272.35	0.399251
SNAIL	15.2227	0.313975	88	72	2629.59	0.336804
SNAIL	25.4324	0.234639	3	3.5	851.376	0.403756
SNAIL	21.7048	0.494763	7.5	7	367.138	0.476599
SNAIL	12.2053	0.290035	8	7.5	988.771	0.417405
SNAIL	14.6689	0.262257	8.5	4.5	214.89	0.651471
SNAIL	14.7555	0.300632	24	22	1390.86	0.425997
SNAIL	16.8503	0.321741	23.5	19	1888.59	0.307495
SNAIL	23.6152	0.343682	70.5	64	3830.97	0.277455
SNAIL	23.5342	0.317868	10.5	3	377.734	0.485365
SNAIL	17.1499	0.361027	17.5	7	67.8471	0.90485
SNAIL	19.4461	0.285732	6.5	3.5	29.1628	0.976301
SNAIL	19.6091	0.265941	4	2.5	1667.92	0.277744
SNAIL	22.8201	0.097897	58	59.5	4557.24	0.0595871
SNAIL	10.4642	0.388936	14	13.5	337.355	0.624469
SNAIL	14.6255	0.290359	10	6	855.361	0.412223
SNAIL	21.6461	0.306185	10	5.5	527.904	0.482778
SNAIL	18.1244	0.269026	6	2.5	147.621	0.660553
SNAIL	12.8655	0.229424	8	2.5	1001.9	0.384606
SNAIL	19.4461	0.275574	4.5	2.5	24.0643	0.994261
SNAIL	25.731	0.282063	22.5	18.5	1398.64	0.399028
SNAIL	14.7555	0.268022	13.5	8.5	473.338	0.581621
SNAIL	18.8138	0.239919	5	3	280.714	0.564248
SNAIL	14.1386	0.271785	9	4.5	472.269	0.500932
SNAIL	19.7063	0.333445	14.5	10	906.827	0.419941
SNAIL	17.948	0.291013	5.5	2	638.15	0.395965
SNAIL	22.2265	0.309718	49	39	2990.17	0.265434
SNAIL	19.2156	0.354597	6.5	2.5	2920.09	0.119537
SNAIL	18.2992	0.513774	25	32.5	4697.25	0.0327777
SNAIL	25.0287	0.26756	29.5	18	888.779	0.479468
SNAIL	9.96557	0.305296	49	39.5	3191.09	0.221582
SNAIL	19.4788	0.300344	12.5	6.5	523.031	0.527527
SNAIL	21.2902	0.368187	8	4	893.999	0.350538
SNAIL	16.3128	0.35305	36.5	14.5	1085.97	0.428183
SNAIL	20.8369	0.25578	70.5	50.5	2080.94	0.430268
SNAIL	13.3034	0.26131	5.5	3.5	1843.48	0.238142
SNAIL	15.3061	0.309139	7.5	3	72.6906	0.778652
SNAIL	15.4304	0.364939	15	11.5	1063.82	0.374744
SNAIL	16.5453	0.266433	9	3	617.671	0.44715
SNAIL	19.5441	0.29667	9.5	3.5	306.326	0.547864
SNAIL	24.67	0.257361	5	4	1041.25	0.358867
SNAIL	23.3986	0.318585	6	12	3023.51	0.188809
SNAIL	16.0373	0.189109	9.5	3	587.663	0.491699
SNAIL	19.7386	0.229983	16	8	1503.81	0.344302
SNAIL	19.9631	0.188739	18	7.5	2637.29	0.278491
SNAIL	19.8672	0.273841	10	5	1670.61	0.313115
SNAIL	12.4122	0.393941	9	13	421.618	0.583045
SNAIL	25.8298	0.40941	11.5	5.5	111.193	0.710824
SNAIL	18.334	0.224143	29	15	1708.88	0.367435
SNAIL	21.0799	0.256464	8	4.5	90.2204	0.843111
SNAIL	25.0795	0.285075	14	10	654.371	0.500069
SNAIL	12.8655	0.144096	8	4.5	379.494	0.628335
SNAIL	24.122	0.266522	28.5	16.5	1912	0.356105
SNAIL	25.4574	0.0998972	21.5	12.5	2301.48	0.228048
SNAIL	14.5819	0.235872	15	4.5	400.155	0.565108
SNAIL	20.591	0.404661	10	5	173.376	0.642545
SNAIL	20.6219	0.234811	36	28	7012.5	0.130263
SNAIL	18.7121	0.283934	5	2	251.362	0.541477
SNAIL	19.0158	0.258951	8	2	4147.56	0.115854
SNAIL	28.2546	0.37936	7	6.5	712.547	0.387972
SNAIL	21.2303	0.462101	14.5	10.5	3404.28	0.104868
SNAIL	19.3147	0.252848	11.5	6.5	448.049	0.571006
SNAIL	24.3584	0.275854	84.5	5	675.261	0.449032
SNAIL	18.5755	0.348134	30	17	3391.56	0.137431
SNAIL	13.7273	0.207647	11.5	7.5	130.386	0.848492
SNAIL	19.6091	0.492472	14.5	4.5	1205.64	0.229268
SNAIL	23.7228	0.496935	24.5	20	1004.48	0.374013
SNAIL	19.7708	0.18725	7	2.5	4628.03	0.0955334
SNAIL	24.0162	0.387919	64.5	62.5	3091.74	0.182512
SNAIL	21.9672	0.286959	29.5	21	1752.24	0.359136
SNAIL	14.273	0.287839	9	5.5	423.001	0.510949
SNAIL	20.745	0.249882	17.5	12.5	555.416	0.624226
SNAIL	27.0811	0.439301	17.5	17	862.242	0.429774
SNAIL	16.1165	0.238326	20	10.5	755.687	0.569335
SNAIL	23.8299	0.352152	15.5	12.5	859.918	0.418701
SNAIL	20.591	0.161537	10.5	4	105.418	0.840103
SNAIL	15.3061	0.428829	46	35.5	2268.29	0.266915
SNAIL	14.1386	0.341081	14	11	1452.98	0.324483
SNAIL	25.2061	0.350104	2.5	3	3932.5	0.0887307
SNAIL	18.4379	0.2922	16.5	7.5	220.174	0.69686
SNAIL	18.3687	0.257617	32	14	464.522	0.690982
SNAIL	12.9149	0.428542	75.5	61	1963.74	0.325016
SNAIL	20.8674	0.602766	21.5	20	1333.52	0.288904
SNAIL	23.7496	0.367708	33.5	27	2597.56	0.168917
SNAIL	26.2939	0.560738	9	8	442.722	0.425458
SNAIL	14.7123	0.25011	11	2.5	5680.79	0.0657443
SNAIL	23.3168	0.298364	23.5	16	2056.04	0.313488
SNAIL	18.2295	0.329862	12	6.5	545.695	0.495545
SNAIL	20.1219	0.197067	12.5	5.5	367.081	0.637521
SNAIL	11.9416	0.199381	10	10.5	112.351	0.9768
SNAIL	22.3408	0.0744158	4	8	442.129	0.521145
SNAIL	19.1824	0.200962	9.5	5	3218.44	0.262308
SNAIL	24.122	0.343913	21.5	20	921.84	0.482841
SNAIL	18.78	0.258222	4.5	2	160.856	0.637795
SNAIL	18.2992	0.216394	8.5	4	738.487	0.475787
SNAIL	20.6527	0.224221	17	8	1342.19	0.403011
SNAIL	30.4244	0.489874	7.5	4	1077.55	0.24684
SNAIL	20.1535	0.190787	12.5	4.5	1169.52	0.415995
SNAIL	18.5755	0.37942	12.5	4.5	357.354	0.52934
SNAIL	26.6546	0.345659	13.5	12.5	2024.14	0.248552
SNAIL	17.2977	0.351693	11	4.5	2911.96	0.136936
SNAIL	16.4294	0.250499	5.5	3.5	690.466	0.442986
SNAIL	21.2902	0.246316	19.5	16	1881.13	0.367418
SNAIL	20.9891	0.288294	12	5.5	110.245	0.823632
SNAIL	13.5405	0.434037	3.5	2.5	812.305	0.283511
SNAIL	17.0755	0.0505935	4	2	5426.64	0.186744
SNAIL	21.0496	0.215458	6	2.5	392.866	0.540645
SNAIL	19.5115	0.383597	15.5	5	1625.8	0.228895
SNAIL	23.3986	0.311262	39.5	31	1673.24	0.401483
SNAIL	21.8801	0.224924	7.5	4	1934.81	0.281393
SNAIL	19.4461	0.202108	12.5	2	56.4749	0.819142
SNAIL	20.1851	0.35643	17	9.5	3074.38	0.155016
SNAIL	20.0267	0.240076	4.5	2	1161.06	0.318272
SNAIL	15.8376	0.326533	8	4.5	5278.12	0.0310588
SNAIL	20.9587	0.343204	5	2.5	191.481	0.566158
SNAIL	21.7634	0.329873	12	8.5	1174.18	0.37611
SNAIL	21.4985	0.207395	12	7.5	230.743	0.756121
SNAIL	20.3734	0.213985	21	10.5	2951.04	0.305661
SNAIL	19.5115	0.500559	8	5.5	849.994	0.373471
SNAIL	18.9487	0.232739	6	2.5	146.203	0.684864
SNAIL	23.0421	0.55893	11	9	1114.34	0.269627
SNAIL	26.0262	0.382937	273	266.5	4041.89	0.266199
SNAIL	18.4033	0.174982	3.5	2.5	7887.39	0.0611865
SNAIL	23.2347	0.308851	7	4.5	378.701	0.583128
SNAIL	24.5924	0.468551	10.5	8.5	993.452	0.295253
SNAIL	26.4147	0.196937	23.5	4	2448.34	0.266581
SNAIL	28.4343	0.456718	8	2.5	1003.34	0.262944
SNAIL	12.7661	0.475705	42.5	9.5	1468.12	0.247249
SNAIL	12.5651	0.187271	13.5	13	1212.52	0.500892
SNAIL	26.1726	0.297248	8.5	8.5	2973.84	0.234537
SNAIL	12.9641	0.330156	3.5	4	49.147	0.868868
SNAIL	18.5755	0.477158	12	6	675.032	0.410737
SNAIL	21.0799	0.578989	240.5	195	1299.54	0.577906
SNAIL	20.2166	0.190284	6	5	2787.69	0.277473
SNAIL	20.2795	0.294616	5	2.5	4080.29	0.0937782
SNAIL	25.1048	0.232995	6.5	3.5	1041.33	0.431525
SNAIL	13.3512	0.613886	34.5	30.5	1893.06	0.252376
SNAIL	22.0251	0.367866	7.5	3.5	270.346	0.538811
SNAIL	19.4788	0.276526	5.5	2.5	59.1884	0.809918
SNAIL	21.9092	0.749023	8.5	4.5	29.9798	0.889733
SNAIL	20.1219	0.325575	17	9	362.728	0.517663
SNAIL	26.4147	0.212359	12.5	6	746.633	0.481867
SNAIL	18.5068	0.218807	18.5	8	2262.53	0.306101
SNAIL	20.1851	0.483432	11	5.5	156.885	0.610744
SNAIL	24.2536	0.422127	10.5	9.5	231.156	0.600961
SNAIL	30.7367	0.368863	80	18.5	1365.75	0.376065
SNAIL	20.9283	0.352137	8.5	6.5	132.304	0.73956
SNAIL	16.5453	0.176341	4.5	2	1103.34	0.365396
SNAIL	18.8814	0.344882	4	2	31.8059	0.844611
SNAIL	20.3734	0.244581	25	9.5	298.801	0.724166
SNAIL	22.0251	0.262183	3.5	2	132.168	0.686354
SNAIL	21.0194	0.399931	11.5	9	122.351	0.798962
SNAIL	22.3693	0.346517	14.5	11.5	1060.2	0.407432
SNAIL	25.1808	0.512258	5.5	7	1522.22	0.196773
SNAIL	22.0828	0.383459	35	30	1307.57	0.419536
SNAIL	20.8369	0.221518	7	4	1132.29	0.385137
SNAIL	16.6221	0.410717	10	5	138.23	0.686899
SNAIL	23.9099	0.584221	5.5	3	59.5208	0.686762
SNAIL	22.054	0.338388	26.5	20.5	3376.11	0.197385
SNAIL	22.1116	0.382173	16.5	11.5	2134.98	0.263009
SNAIL	21.5576	0.27675	19	12	814.935	0.511969
SNAIL	17.2977	0.0479779	3.5	6.5	810.075	0.812964
SNAIL	18.4724	0.370756	16.5	9.5	2249.38	0.314674
SNAIL	20.0902	0.292103	8	3.5	360.275	0.509069
SNAIL	22.3977	0.380254	29	22	2835.02	0.225421
SNAIL	23.1249	0.466996	13	11.5	173.022	0.734986
SNAIL	23.9897	0.602735	43.5	25.5	1789.19	0.191498
SNAIL	21.851	0.415825	54	43.5	2664.81	0.232038
SNAIL	21.9962	0.438064	11	10	1094.53	0.312185
SNAIL	18.5412	0.249886	5.5	2	468.819	0.465474
SNAIL	22.2265	0.700291	67.5	67.5	755.945	0.582035
SNAIL	23.3168	0.48123	10.5	7.5	355.169	0.598464
SNAIL	14.7555	0.504057	22.5	27.5	1621.91	0.2944
SNAIL	18.78	0.295869	5.5	2.5	836.955	0.366088
SNAIL	21.7634	0.287583	9	7.5	2699.94	0.223178
SNAIL	20.3108	0.369487	10	5	38.8653	0.907925
SNAIL	22.8758	0.312181	12	7	615.521	0.488687
SNAIL	20.4046	0.302164	7	3	354.131	0.49746
SNAIL	22.3693	0.390193	75	59.5	1702.24	0.399017
SNAIL	21.0194	0.3651	5.5	4	26.1515	0.970784
SNAIL	19.9631	0.273746	16.5	6	924.794	0.415409
SNAIL	21.1402	0.432135	19	14	913.615	0.402738
SNAIL	19.674	0.371666	8	4	42.6063	0.864176
SNAIL	18.9151	0.223823	10.5	3.5	838.614	0.415011
SNAIL	19.5441	0.488637	24.5	17	2532.5	0.197807
SNAIL	19.5767	0.232995	14	2.5	161.976	0.689806
SNAIL	27.2218	0.421539	35	43.5	1809.54	0.336511
SNAIL	22.4261	0.319284	62.5	51.5	2484.45	0.333956
SNAIL	18.7121	0.204641	8.5	4	59.2533	0.927328
SNAIL	21.2303	0.350956	25	13	6860.55	0.0171872
SNAIL	24.4627	0.396209	26	22.5	1487.16	0.317068
SNAIL	20.0267	0.200205	4.5	2	106.097	0.734247
SNAIL	20.0902	0.227716	8.5	3.5	748.168	0.4676
SNAIL	21.3201	0.335655	111.5	94.5	4367.72	0.171027
SNAIL	24.773	0.327579	22.5	24.5	2250.01	0.272745
SNAIL	17.2977	0.275854	7.5	3.5	762.549	0.448321
SNAIL	24.8243	0.448406	35	34	2778.87	0.159512
SNAIL	18.5412	0.292806	4	2.5	662.086	0.292755
SNAIL	18.6439	0.25512	17	5	365.131	0.633648
SNAIL	18.4033	0.270322	14.5	4.5	219.748	0.669458
SNAIL	24.5924	0.37649	7	6	136.962	0.712905
SNAIL	17.0755	0.17256	4.5	2.5	185.772	0.688814
SNAIL	18.334	0.320149	6.5	3	84.0044	0.758911
SNAIL	23.0421	0.343035	24.5	15	1242.94	0.412203
SNAIL	22.9868	0.734035	9	6.5	166.383	0.614988
SNAIL	17.187	0.215962	8.5	4.5	2722.46	0.226125
SNAIL	19.116	0.338042	6	2.5	394.193	0.46102
SNAIL	21.4095	0.276344	10.5	7.5	823.454	0.458019
SNAIL	19.8992	0.572591	6	3	62.8232	0.699717
SNAIL	24.1747	0.369033	13	9.5	646.281	0.438642
SNAIL	20.7757	0.266944	10	3.5	832.335	0.412725
SNAIL	19.9631	0.282356	10	5.5	1743.77	0.287307
SNAIL	19.4788	0.390842	6	3.5	361.723	0.460947
SNAIL	19.8672	0.358267	8	5	37.8141	0.934321
SNAIL	19.5767	0.255903	4.5	2	114.358	0.684557
SNAIL	18.5755	0.278746	10.5	8	2147.82	0.323351
SNAIL	22.3408	0.433241	44	34	843.901	0.402485
SNAIL	21.5872	0.353993	8.5	6.5	441.865	0.506447
SNAIL	22.6239	0.339202	17	16	552.933	0.589294
SNAIL	20.0902	0.227028	6	3	1356.37	0.187919
SNAIL	19.7386	0.218807	8.5	4.5	1420.5	0.324735
SNAIL	22.4261	0.222662	5.5	3	95.3256	0.797021
SNAIL	21.1402	0.290035	4.5	3.5	1239.04	0.35186
SNAIL	19.2156	0.12689	11.5	5	6539.59	0.111031
SNAIL	19.2156	0.204982	11.5	8	2585.7	0.2089
SNAIL	20.0585	0.305817	6.5	4.5	92.8812	0.796654
SNAIL	20.9891	0.246262	13	8.5	807.809	0.471413
SNAIL	18.4724	0.250053	5	2	123.848	0.669014
SNAIL	22.1116	0.40899	10.5	9.5	362.236	0.512745
SNAIL	18.0541	0.291346	7	3	163.021	0.650087
SNAIL	19.803	0.254444	8.5	3.5	1567.27	0.311701
SNAIL	21.4392	0.21965	10	5	931.332	0.419262
SNAIL	25.0287	0.348192	29.5	27	360.206	0.655095
SNAIL	19.9311	0.195952	6	3.5	313.448	0.637109
SNAIL	25.3823	0.355868	41.5	41	2195.79	0.295981
SNAIL	23.7496	0.556644	12.5	12	516.595	0.490031
SNAIL	19.9631	0.222515	12	4	965.46	0.399727
SNAIL	20.4358	0.156584	4.5	2.5	870.722	0.384613
SNAIL	20.745	0.345424	6.5	4.5	1185.14	0.28879
SNAIL	22.5958	0.356683	4	3	73.8818	0.745187
SNAIL	22.9314	0.247886	23	15.5	745.848	0.588493
SNAIL	19.4788	0.138856	41	8.5	1507.7	0.450416
SNAIL	21.2902	0.369598	11	5.5	4533.57	0.0581858
SNAIL	22.1116	0.287088	23	15	520.8	0.626114
SNAIL	23.7228	0.520022	59.5	66.5	3177.07	0.114674
SNAIL	20.7143	0.198265	12	4.5	1327.71	0.38804
SNAIL	26.1482	0.394789	22	24	1231.26	0.387812
SNAIL	21.5281	0.220684	10.5	6.5	495.486	0.585608
SNAIL	22.7642	0.272852	5	4	7956.33	0.0284557
SNAIL	21.851	0.375604	4.5	3	50.4394	0.822286
SNAIL	21.9092	0.195232	8	4.5	1666.19	0.333439
SNAIL	19.3477	0.255996	8.5	3.5	175.826	0.690852
SNAIL	21.6461	0.293829	22.5	10.5	177.16	0.751332
SNAIL	22.5394	0.318644	9	6.5	473.417	0.533249
SNAIL	13.1106	0.406753	12	13.5	834.9	0.383686
SNAIL	23.7764	0.230626	28.5	16	4602.28	0.155445
SNAIL	25.8298	0.630958	6.5	6.5	288.96	0.498112
SNAIL	25.6567	0.654043	12.5	21.5	2923.76	0.0710047
SNAIL	23.0145	0.397847	7	4	124.011	0.683369
SNAIL	23.1249	0.248004	3.5	4.5	1026.6	0.396121
SNAIL	23.1524	0.636258	12.5	9	247.735	0.512319
SNAIL	20.4669	0.6016	6	2.5	966.845	0.21987
SNAIL	20.3734	0.223028	9	5	756.501	0.487193
SNAIL	19.1492	0.2635	5.5	2	35.7049	0.877253
SNAIL	18.9487	0.267368	6	2.5	49.6801	0.849101
SNAIL	9.30485	0.371142	7.5	6	219.14	0.612424
SNAIL	20.2795	0.272334	11	6.5	1137.19	0.377016
SNAIL	23.696	0.454333	10.5	7	884.55	0.29523
SNAIL	20.1535	0.250633	17	7.5	105.68	0.915821
SNAIL	6.28255	0.604141	16.5	17	1748.34	0.262385
SNAIL	17.1499	0.20919	19	8.5	398.701	0.62974
SNAIL	21.4392	0.298045	23.5	23	1885.59	0.297614
SNAIL	18.746	0.341081	7	4	392.829	0.499176
SNAIL	21.6755	0.200303	13	6.5	935.366	0.461564
SNAIL	14.6255	0.435209	6	7	216.122	0.614425
SNAIL	20.9587	0.207766	8.5	3	3016.25	0.217004
SNAIL	21.4095	0.645495	12	6	450.476	0.373337
SNAIL	26.3423	0.498951	10	11	786.659	0.366167
SNAIL	23.9631	0.456541	22	16	718.794	0.449655
SNAIL	20.3734	0.391432	12	7.5	1758.62	0.249131
SNAIL	7.22515	0.533858	51	59.5	2207.71	0.293666
SNAIL	21.7048	0.311509	6	3	572.083	0.398185
SNAIL	21.9382	0.431093	5	4	199.342	0.560385
SNAIL	12.5651	0.285732	3	3	60.0894	0.834392
SNAIL	21.5576	0.410743	13.5	8.5	1371.39	0.314822
SNAIL	19.6091	0.14928	11.5	7	235.758	0.731901
SNAIL	18.4379	0.30749	5.5	3.5	262.415	0.567458
SNAIL	22.9591	0.425417	5	5	363.71	0.491598
SNAIL	20.4669	0.249	7	3.5	870.152	0.409227
SNAIL	21.4392	0.33388	29.5	21	694.591	0.551411
SNAIL	20.3421	0.210531	7	3	1289.73	0.311765
SNAIL	12.8655	0.284043	3	2	1681.2	0.252498
SNAIL	20.9891	0.361414	12.5	7.5	1246.69	0.319857
SNAIL	18.9151	0.1605	6	2.5	5423.5	0.0757303
SNAIL	25.4073	0.48372	10.5	17	1501.38	0.250752
SNAIL	22.1691	0.280694	12	6	429.071	0.564824
SNAIL	22.1978	0.350746	115	95	3836.15	0.0574391
SNAIL	17.4808	0.227669	7.5	2	55.2734	0.809335
SNAIL	20.1535	0.24923	22.5	14.5	2754.54	0.244825
SNAIL	19.9631	0.295112	30	14.5	4602.85	0.136317
SNAIL	21.1402	0.297571	4	2	1384.91	0.271183
SNAIL	20.4046	0.411478	5.5	3.5	99.5207	0.683563
SNAIL	22.1404	0.333788	2.5	2.5	174.849	0.60892
SNAIL	18.7121	0.284201	15.5	7	491.526	0.562584
SNAIL	23.6422	0.437647	88	58	3385.58	0.148557
SNAIL	18.0541	0.200432	4.5	2	239.124	0.596255
SNAIL	23.0145	0.319543	17.5	13	1131.14	0.420148
SNAIL	23.0421	0.423085	45	40.5	1947.56	0.250013
SNAIL	24.773	0.333196	10	13	2483.46	0.222
SNAIL	20.0267	0.623292	9.5	4	28.5189	0.866958
SNAIL	19.3805	0.224197	4.5	2	552.112	0.447399
SNAIL	17.7697	0.170777	8.5	9	301.251	0.854417
SNAIL	21.7341	0.309915	5.5	2.5	542.59	0.419129
SNAIL	21.6461	0.247778	4	2	77.5548	0.756162
SNAIL	20.2166	0.423949	10.5	6	668.089	0.45781
SNAIL	20.8063	0.316243	5	3	605.434	0.420634
SNAIL	18.5068	0.357125	13	5	149.956	0.675755
SNAIL	18.6439	0.291346	4.5	2	2109.4	0.195758
SNAIL	30.5497	0.0697568	8.5	4	942.819	0.408405
SNAIL	19.9949	0.390001	9.5	4	1241.21	0.274927
SNAIL	21.8218	0.282356	6.5	3.5	166.767	0.643737
SNAIL	19.5115	0.199628	141.5	94	2733.87	0.556512
SNAIL	22.4261	0.267179	5	2	756.091	0.376635
SNAIL	20.2166	0.356096	8.5	5.5	2364.37	0.171686
SNAIL	21.9672	0.380585	22.5	15.5	1787.3	0.302538
SNAIL	17.8055	0.190871	17	9	897.112	0.538143
SNAIL	20.0902	0.618252	13.5	4	1323.79	0.179758
SNAIL	19.9631	0.306367	7.5	3.5	332.929	0.50462
SNAIL	18.4724	0.202812	7	3.5	4407.58	0.161238
SNAIL	21.2303	0.290692	12.5	7	98.4042	0.876678
SNAIL	22.8201	0.379377	33	15	1688.76	0.277302
SNAIL	18.2644	0.237235	18.5	7.5	757.147	0.483078
SNAIL	9.30485	0.315316	3	3	1001.91	0.336812
SNAIL	20.8369	0.289947	5.5	5.5	1207.8	0.340801
SNAIL	19.7386	0.286868	11.5	7	661.477	0.511729
SNAIL	19.2817	0.279275	30.5	19	2895.74	0.264658
SNAIL	17.4443	0.0174087	16.5	6.5	965.038	0.442962
SNAIL	23.3986	0.386974	34	27.5	1911.99	0.299374
SNAIL	21.2603	0.453017	24.5	6	897.855	0.348592
SNAIL	17.5897	0.196937	5.5	3	3933.23	0.184726
SNAIL	22.0251	0.2038	8	8.5	4737.44	0.171929
SNAIL	17.9125	0.240983	12	4.5	453.716	0.523423
SNAIL	20.3108	0.396294	19	11	830.236	0.445234
SNAIL	17.1127	0.257118	47	3.5	2532.19	0.181959
SNAIL	16.4294	0.245072	3.5	2	5219.4	0.0776618
SNAIL	20.9587	0.350985	5	3	2688.11	0.0858696
SNAIL	23.3986	0.448696	38.5	28	2214.75	0.26235
SNAIL	21.0496	0.466667	15	10.5	342.91	0.534198
SNAIL	20.7143	0.215068	15	6	1828.1	0.344206
SNAIL	10.4031	0.360974	2	2.5	28.2237	0.887298
SNAIL	18.1244	0.208167	34.5	16	2568.01	0.344132
SNAIL	24.201	0.434212	37	38	1704.42	0.314731
SNAIL	8.36828	0.375883	136	131.5	3282.75	0.292918
SNAIL	20.2166	0.528398	34	24	978.658	0.368825
SNAIL	20.3734	0.376038	2	2	38.9113	0.793184
SNAIL	7.48482	0.294514	12.5	8.5	1287.71	0.362136
SNAIL	20.1219	0.452947	19.5	12.5	1050.62	0.301839
SNAIL	18.9823	0.403599	9.5	3.5	46.546	0.827537
SNAIL	25.9282	0.562088	7	6	112.758	0.666491
SNAIL	20.3108	0.423987	7	4	705.053	0.395474
SNAIL	21.2603	0.394564	5	2.5	274.225	0.499964
SNAIL	28.635	0.360171	18.5	11.5	1713.3	0.297551
SNAIL	22.8479	0.26615	12	8	1550.89	0.352432
SNAIL	18.78	0.226905	13	5.5	664.448	0.51256
SNAIL	23.1524	0.727754	3.5	2	22.5629	0.788982
SNAIL	15.8376	0.411725	26	21.5	2628.54	0.164451
SNAIL	19.8992	0.358562	30	14.5	295.346	0.662058
SNAIL	21.2003	0.287882	13	4.5	128.061	0.761253
SNAIL	20.3734	0.3487	11	5	1056.03	0.34249
SNAIL	25.8544	0.348684	15	19	1362.1	0.333713
SNAIL	19.1492	0.231248	15.5	4.5	758.511	0.461743
SNAIL	23.0421	0.528021	46.5	38	2983.1	0.13231
SNAIL	18.0188	0.213985	6.5	2	749.894	0.401257
SNAIL	12.8159	0.288336	14.5	12.5	177.248	0.7366
SNAIL	21.4095	0.326499	22	14	1690.5	0.318538
SNAIL	26.7737	0.336452	21.5	13	270.093	0.685502
SNAIL	20.591	0.333294	11	6.5	357.644	0.53333
SNAIL	20.1535	0.225493	8.5	3.5	8233.05	0.0389405
SNAIL	15.7973	0.640287	3	5.5	95.5828	0.694894
SNAIL	19.0826	0.213481	42.5	16	302.648	0.797652
SNAIL	21.1703	0.268856	6	4	154.405	0.691513
SNAIL	20.745	0.323637	8	3.5	2344.4	0.141265
SNAIL	20.498	0.348694	14.5	14.5	710.924	0.42153
SNAIL	18.5068	0.183239	12	5	1710.66	0.329471
SNAIL	21.11	0.231802	23.5	19.5	377.027	0.631067
SNAIL	18.6097	0.24113	10.5	3	114.095	0.762308
SNAIL	17.0755	0.237235	3	2.5	561.754	0.497762
SNAIL	13.3512	0.535279	6.5	6	1385.34	0.249682
SNAIL	12.9641	0.234879	6	5.5	150.934	0.802205
SNAIL	20.8063	0.265648	14.5	6	862.471	0.434512
SNAIL	20.3734	0.423361	15.5	9	109.164	0.804028
SNAIL	12.4634	0.498581	27	21.5	1608.01	0.308448
SNAIL	18.9151	0.329399	16.5	6	638.766	0.472508
SNAIL	21.4095	0.239775	19	8.5	1021.37	0.445019
SNAIL	19.4461	0.233154	11	5	3168.73	0.154517
SNAIL	18.4033	0.43844	6.5	2.5	885.068	0.324026
SNAIL	28.479	0.42225	6	6.5	172.749	0.715617
SNAIL	15.4716	0.12863	13.5	2.5	4752.93	0.146481
SNAIL	20.9587	0.426456	9	5	362.424	0.49887
SNAIL	20.1851	0.388854	11.5	9	924.625	0.370266
SNAIL	20.4046	0.311392	6	4.5	482.016	0.494743
SNAIL	16.9633	0.216394	5	2	3221.54	0.177143
SNAIL	19.8351	0.223823	9	2.5	279.679	0.598689
SNAIL	18.4033	0.214087	7	2.5	180.606	0.635987
SNAIL	15.3061	0.264618	12.5	7	1306.22	0.396019
SNAIL	19.0492	0.354387	17	10.5	1234.5	0.326376
SNAIL	22.4545	0.408737	34.5	25.5	930.257	0.385645
SNAIL	20.745	0.615756	9.5	5.5	47.9133	0.829958
SNAIL	18.5755	0.185494	13	6	1535.79	0.375484
SNAIL	21.11	0.467099	52	29	1430.82	0.319022
SNAIL	19.1824	0.416886	18	10.5	1672.33	0.254022
SNAIL	23.0145	0.66823	40	36.5	4769.06	0.0396408
SNAIL	21.4392	0.145695	14.5	13	1792.4	0.268226
SNAIL	26.0995	0.444654	26	16.5	1260.1	0.304866
SNAIL	20.4046	0.397572	21	12.5	1558.36	0.289805
SNAIL	19.7386	0.203039	8.5	4	45.7411	0.971286
SNAIL	13.7736	0.679949	28	21.5	522.983	0.533081
SNAIL	19.4461	0.335696	14	8	292.731	0.658783
SNAIL	18.4379	0.174172	32	17	8096.52	0.0901263
SNAIL	24.6958	0.583976	788.5	699	4910.58	0.0532157
SNAIL	21.2603	0.319348	11	5	644.442	0.443122
SNAIL	23.5882	0.513825	426.5	71	4529.23	0.0484552
SNAIL	17.187	0.13532	686.5	662	5773.52	0.258981
SNAIL	21.11	0.257988	9	3	1093.54	0.34583
SNAIL	24.2273	0.598243	33	4.5	2423.02	0.0846812
SNAIL	17.8412	0.182313	16.5	5	1136.54	0.410263
SNAIL	17.5172	0.243222	175.5	8.5	5335.82	0.162873
SNAIL	19.6091	0.358947	9	2.5	906.161	0.303905
SNAIL	13.2073	0.291346	7.5	3.5	1766.02	0.269935
SNAIL	18.0541	0.213973	13	5	1346.23	0.374519
SNAIL	17.8769	0.28719	7.5	3.5	122.103	0.74328
SNAIL	20.3108	0.465191	69	42.5	2909.14	0.0730471
SNAIL	29.0544	0.630381	108.5	17	868.285	0.297896
SNAIL	17.224	0.221781	9	2	63.2921	0.787655
SNAIL	16.4294	0.305046	4.5	2.5	270.502	0.540185
SNAIL	21.4392	0.399406	13	8.5	558.815	0.501223
SNAIL	20.6527	0.443198	15	6.5	1718.63	0.226693
SNAIL	17.0008	0.136388	5.5	3	3434.37	0.196791
SNAIL	22.4261	0.419512	4.5	2	72.1978	0.721127
SNAIL	22.2551	0.56173	7.5	4.5	161.968	0.586713
SNAIL	21.9382	0.420778	8.5	3.5	61.3356	0.791663
SNAIL	25.3823	0.398963	11	10	1012.24	0.364937
SNAIL	23.7764	0.301562	20	13.5	2494.61	0.247334
SNAIL	18.7121	0.240185	8	3	70.0321	0.830852
SNAIL	18.4379	0.237282	6	2	1096.04	0.338804
SNAIL	18.9487	0.210941	7	3.5	2544.25	0.232341
SNAIL	26.9633	0.398182	5	12.5	539.916	0.508579
SNAIL	19.4134	0.562703	4	5	77.7404	0.7519
SNAIL	20.6219	0.210598	11.5	9.5	2771.41	0.294678
SNAIL	21.7341	0.260592	15.5	10.5	121.85	0.921423
SNAIL	23.8032	0.411593	16	9.5	832.399	0.442803
SNAIL	12.5143	0.591846	49	16	1417.92	0.231991
SNAIL	13.3034	0.35657	394	152	1977.51	0.405422
SNAIL	23.3168	0.409007	36	43	1590.22	0.338758
SNAIL	17.6979	0.401921	6	7	78.7935	0.839594
SNAIL	31.189	0.647666	78.5	47.5	2692.64	0.10951
SNAIL	13.7273	0.257243	11.5	8.5	1324.05	0.361078
SNAIL	19.674	0.368495	15.5	9	155.34	0.788879
SNAIL	15.6353	0.340528	86	52.5	3255.75	0.244559
SNAIL	26.8687	0.425098	98	78	3061.47	0.149472
SNAIL	24.4366	0.286268	6	3.5	1541.93	0.319906
SNAIL	21.4392	0.269054	6	3.5	520.896	0.47889
SNAIL	29.7473	0.63661	29.5	24	1626.75	0.214163
SNAIL	20.4358	0.216887	10.5	3.5	205.706	0.698651
SNAIL	19.803	0.257759	97.5	40	2000.72	0.409663
SNAIL	25.2565	0.329049	5	4.5	267.466	0.578734
SNAIL	17.5897	0.225449	3.5	2	116.087	0.687122
SNAIL	21.851	0.427567	54	37.5	2543.12	0.207496
SNAIL	21.4689	0.359569	4.5	3.5	690.324	0.377164
SNAIL	18.0541	0.243186	5	3	151.86	0.675713
SNAIL	18.4033	0.308656	5	2	67.4055	0.731499
SNAIL	19.5441	0.23328	6	2	788.31	0.389507
SNAIL	22.5676	0.250516	29.5	19	1327.34	0.491978
SNAIL	22.7921	0.437032	5.5	4	281.836	0.523567
SNAIL	20.4358	0.333035	11.5	5.5	4561.95	0.0836697
SNAIL	21.2303	0.209743	9	4.5	424.635	0.577619
SNAIL	20.9891	0.294606	25	19	1898.84	0.35389
SNAIL	25.0541	0.324097	12	10.5	2888.48	0.194115
SNAIL	23.7764	0.362968	61	50.5	2275.18	0.306984
SNAIL	21.2603	0.390352	36	18	1398.09	0.33369
SNAIL	24.0162	0.280872	15	13.5	1100.06	0.423388
SNAIL	23.7764	0.424074	47.5	43	2863.53	0.191312
SNAIL	29.1419	0.281921	8.5	4	307.287	0.562346
SNAIL	14.3619	0.285689	5.5	4.5	7541.42	0.00148517
SNAIL	19.7063	0.221407	17	5.5	3042.02	0.241572
SNAIL	22.3977	0.28422	10.5	7	1234.38	0.375869
SNAIL	21.5576	0.262135	11	5	1348.94	0.333713
SNAIL	13.4934	0.334657	8.5	4	1947.42	0.200378
SNAIL	17.5897	0.357779	11.5	6	399.009	0.509561
SNAIL	27.6165	0.361334	25.5	12.5	1560.28	0.324532
SNAIL	19.6091	0.291272	13	5	510.508	0.504121
SNAIL	23.2073	0.281766	25	21.5	4465.56	0.163083
SNAIL	24.5147	0.565345	149.5	123.5	3001.88	0.233491
SNAIL	26.6068	0.383382	10.5	15	809.619	0.445801
SNAIL	16.1953	0.415772	24.5	12	1275.47	0.299126
SNAIL	21.3797	0.422646	9.5	8	99.858	0.802722
SNAIL	23.1524	0.27081	19	14	1173.71	0.434857
SNAIL	23.0145	0.500632	19	19.5	2104.95	0.168465
SNAIL	20.0585	0.406893	15	10.5	696.118	0.429307
SNAIL	13.6809	0.283574	14	8	408.722	0.663227
SNAIL	18.9487	0.265399	8.5	2.5	450.274	0.484811
SNAIL	21.5576	0.15673	18.5	12.5	331.557	0.814426
SNAIL	30.2355	0.344939	11.5	10	74.7631	0.910013
SNAIL	21.4095	0.209807	14.5	8	2484.97	0.266846
SNAIL	13.4934	0.412346	8	6	66.4075	0.886811
SNAIL	20.4358	0.347848	12.5	4	103.097	0.730322
SNAIL	25.1808	0.517374	39	52	2568.58	0.187884
SNAIL	23.9631	0.250108	9	5	429.737	0.560822
SNAIL	24.67	0.402704	44.5	39	3144.23	0.16698
SNAIL	22.054	0.230449	13.5	8.5	541.595	0.592833
SNAIL	23.0145	0.313564	9	6.5	901.328	0.413771
SNAIL	20.8063	0.343323	8.5	5	112.562	0.751317
SNAIL	24.1484	0.252383	10.5	8.5	1746.43	0.309383
SNAIL	14.4062	0.353418	30.5	24	195.328	0.913457
SNAIL	23.6422	0.44479	23.5	16	1959.81	0.204625
SNAIL	21.2003	0.271186	4.5	2.5	1318.63	0.299259
SNAIL	19.8672	0.330032	17.5	8	767.77	0.435388
SNAIL	24.5665	0.26044	3.5	3.5	781.827	0.404672
SNAIL	21.7048	0.207285	30.5	24	3728.29	0.270777
SNAIL	21.9092	0.421982	17	10	874.234	0.374629
SNAIL	20.8369	0.386408	28.5	19	1685.8	0.299944
SNAIL	29.0105	0.256012	9.5	6.5	353.006	0.644661
SNAIL	21.11	0.465393	10.5	6	605.109	0.404265
SNAIL	19.7063	0.271589	6	2.5	171.93	0.627483
SNAIL	23.1524	0.312759	17.5	11	386.63	0.629206
SNAIL	12.9149	0.387962	10.5	7.5	59.8832	0.913329
SNAIL	18.9151	0.259687	8	4.5	790.345	0.438014
SNAIL	24.0427	0.460534	46	45	2466.95	0.210557
SNAIL	18.4724	0.239263	4.5	2	4474.23	0.186209
SNAIL	21.7048	0.343204	11	5.5	213.995	0.637873
SNAIL	18.0893	0.317526	8.5	3	105.647	0.705416
SNAIL	19.0158	0.353018	8	2.5	171.6	0.594511
SNAIL	19.1824	0.236595	7	3	1259.71	0.340213
SNAIL	19.9949	0.327495	11	4.5	187.128	0.658101
SNAIL	26.9633	0.410751	65.5	54.5	2557.28	0.250311
SNAIL	21.8218	0.521806	26.5	19.5	765.964	0.447182
SNAIL	23.6422	0.273228	18	11.5	1779.54	0.318111
SNAIL	27.6395	0.362831	30.5	31.5	3217.4	0.168184
SNAIL	23.6152	0.446431	243	185	3082.01	0.258133
SNAIL	13.7273	0.470343	54.5	30.5	2090.95	0.222865
SNAIL	20.7757	0.354135	24.5	15	1726.28	0.32497
SNAIL	22.3693	0.478108	36	24	1489.82	0.290655
SNAIL	25.2313	0.470438	68.5	36.5	2785.6	0.153546
SNAIL	14.1386	0.417625	15.5	9.5	940.627	0.363258
SNAIL	19.3805	0.209449	18	4.5	1012.13	0.436746
SNAIL	13.1591	0.382256	22	18.5	1815.46	0.276305
SNAIL	22.3693	0.349751	9.5	6	1175.47	0.325967
SNAIL	20.7143	0.366645	9.5	5.5	1723.18	0.217638
SNAIL	21.4095	0.346019	7.5	4	482.38	0.460265
SNAIL	22.5676	0.287852	19	14.5	2402.58	0.233121
SNAIL	22.5111	0.414206	36.5	22.5	1981.69	0.240436
SNAIL	10.764	0.436359	63.5	27	174.152	0.913981
SNAIL	20.3734	0.271626	16.5	8	68.4483	0.927323
SNAIL	23.5071	0.511704	61	37.5	1785.39	0.259921
SNAIL	13.3512	0.252402	16.5	4.5	1520.29	0.323553
SNAIL	15.3061	0.435121	7	4.5	799.571	0.34639
SNAIL	34.9069	0.621113	173	52	4281.37	0.0199516
SNAIL	14.2283	0.412346	10.5	6	428.174	0.476943
SNAIL	21.0799	0.289755	36	20	1754.74	0.384505
SNAIL	20.6835	0.394683	19.5	11	612.614	0.484052
SNAIL	13.1106	0.42886	76	64	2331.68	0.248748
SNAIL	13.9573	0.397817	29	18	621.551	0.541125
SNAIL	12.5651	0.371684	9	6	1060.59	0.309992
SNAIL	20.6527	0.220498	12	6	131.315	0.840523
SNAIL	22.0828	0.43001	35.5	20	1304.66	0.359047
SNAIL	20.1219	0.227716	9.5	3	188.233	0.676517
SNAIL	17.4808	0.239057	8.5	4	1242.64	0.330924
SNAIL	24.0427	0.383789	40	23	2348.82	0.231784
SNAIL	20.0902	0.263069	19	17.5	7190.66	0.0151838
SNAIL	18.8814	0.432473	11.5	7.5	282.667	0.539549
SNAIL	23.1524	0.64539	18.5	13	876.625	0.284738
SNAIL	21.4095	0.44753	15	9	416.836	0.530041
SNAIL	21.1402	0.517867	27.5	18.5	1765.96	0.254646
SNAIL	23.2347	0.419512	98	56.5	1983.84	0.271719
SNAIL	22.4545	0.268707	17.5	13.5	649.9	0.542031
SNAIL	12.3608	0.325961	3	2.5	16.785	0.990639
SNAIL	19.9311	0.449317	16	9.5	5994.18	0.0561086
SNAIL	19.5441	0.234811	5	2	107.218	0.707455
SNAIL	23.8032	0.294136	33	28	1830.68	0.366305
SNAIL	19.8672	0.284112	16.5	11.5	410.019	0.63017
SNAIL	21.6461	0.28769	11.5	5	732.661	0.450339
SNAIL	15.9975	0.347159	39	18	4440.46	0.122367
SNAIL	22.0828	0.49647	20.5	12	987.285	0.36392
SNAIL	25.8544	0.398138	43.5	48.5	2650.55	0.233889
SNAIL	23.8032	0.434376	20	16.5	1127.22	0.352572
SNAIL	26.5829	0.373456	92.5	96.5	3498.38	0.230879
SNAIL	18.1244	0.322575	5	2.5	354.166	0.496214
SNAIL	18.0188	0.42456	9.5	2.5	137.084	0.634615
SNAIL	13.3512	0.451002	54	40	1411.38	0.368006
SNAIL	13.6809	0.359649	10.5	4.5	297.696	0.568112
SNAIL	15.9177	0.296166	16	6.5	2411.72	0.205907
SNAIL	19.8992	0.276574	6	2	616.046	0.408195
SNAIL	14.1386	0.365704	16	8.5	1814.08	0.272416
SNAIL	20.3421	0.247297	10	3	1280.09	0.328586
SNAIL	20.9587	0.196752	5.5	3	229.937	0.647895
SNAIL	14.3619	0.246829	16	6.5	1369.54	0.361308
SNAIL	23.5071	0.264676	14.5	9	869.68	0.446915
SNAIL	20.3421	0.378052	22	12	2021.17	0.263496
SNAIL	13.1106	0.313119	5.5	4	357.465	0.535135
SNAIL	28.1869	0.252233	6.5	3.5	991.659	0.384376
SNAIL	18.6097	0.423361	3	3	203.623	0.55177
SNAIL	21.3797	0.216748	6.5	3.5	268.089	0.627317
SNAIL	21.4095	0.196782	13	6	1056.4	0.44201
SNAIL	14.5381	0.429137	7	5.5	780.115	0.362282
SNAIL	22.3408	0.224121	7	3.5	1206.73	0.361368
SNAIL	7.22515	0.423909	53.5	10.5	1499.04	0.266959
SNAIL	22.7921	0.267915	6.5	3.5	130.315	0.713001
SNAIL	24.773	0.261064	32	31.5	2419.73	0.346572
SNAIL	20.9891	0.405442	20.5	12.5	1210.03	0.326062
SNAIL	25.3572	0.526641	117	44.5	1308.67	0.319966
SNAIL	14.7986	0.518845	4.5	3	70.9847	0.709504
SNAIL	13.3034	0.340518	7	3.5	744.969	0.380946
SNAIL	21.8218	0.24794	43.5	32	2993.48	0.338052
SNAIL	20.8674	0.333788	5	2.5	101.051	0.698827
SNAIL	14.4943	0.227817	15.5	7.5	2343.78	0.254013
SNAIL	23.1524	0.482533	7.5	4	605.352	0.349275
SNAIL	10.8817	0.482177	14	11.5	472.118	0.482527
SNAIL	22.1116	0.318585	18.5	13	333.266	0.683407
SNAIL	13.3512	0.231125	22.5	7	3419.92	0.215003
SNAIL	18.78	0.420759	12.5	5.5	78.9975	0.8249
SNAIL	20.498	0.293454	8	3.5	628.711	0.437087
SNAIL	21.0496	0.427408	27	18.5	300.734	0.718226
SNAIL	22.9591	0.218227	6.5	4	926.02	0.409802
SNAIL	18.2295	0.207126	6.5	2.5	7964.47	0.040265
SNAIL	19.0158	0.235197	5	2	231.248	0.609041
SNAIL	20.2795	0.247585	8.5	3	363.173	0.556913
SNAIL	25.2313	0.32946	9	7.5	2247.48	0.221073
SNAIL	23.696	0.431825	56.5	24.5	1821.23	0.26489
SNAIL	21.7634	0.352641	13.5	10.5	1814.4	0.267149
SNAIL	26.8687	0.417418	12	11.5	882.808	0.374042
SNAIL	23.48	0.330018	53	41.5	2146.95	0.310801
SNAIL	19.116	0.298389	6.5	2.5	1802.48	0.232937
SNAIL	20.248	0.348816	44	28.5	3214.41	0.206839
SNAIL	15.1808	0.37954	18.5	14	1530.37	0.292632
SNAIL	21.3797	0.249768	18	5.5	344.799	0.6336
SNAIL	25.2313	0.461895	44.5	39	2051.52	0.308364
SNAIL	21.0799	0.262784	5	2	115.252	0.673348
SNAIL	21.9962	0.375864	19.5	14.5	269.578	0.693958
SNAIL	14.6255	0.22411	9.5	4	1095.76	0.400379
SNAIL	17.4078	0.179235	19.5	5.5	88.8542	0.876841
SNAIL	19.8351	0.246582	22.5	9.5	825.254	0.526788
SNAIL	23.4529	0.447705	16	13.5	1481.63	0.264844
SNAIL	13.9116	0.420777	10.5	5.5	276.638	0.52803
SNAIL	15.389	0.385524	19.5	22.5	1815.69	0.295146
SNAIL	24.0427	0.254035	8.5	13	1356.2	0.407721
SNAIL	25.3069	0.372718	6	12.5	89.4033	0.960395
SNAIL	18.5068	0.264218	6	3	50.38	0.866198
SNAIL	21.4985	0.24943	15	5.5	690.455	0.487669
SNAIL	12.9641	0.362414	11	5.5	749.06	0.388967
SNAIL	20.0267	0.292846	6.5	3	174.109	0.618318
SNAIL	25.9282	0.616561	75.5	72.5	2059.36	0.328115
SNAIL	19.9949	0.238401	5.5	2.5	410.392	0.514902
SNAIL	19.7708	0.324571	9	6.5	737.912	0.404796
SNAIL	20.0902	0.403081	27	16	805.705	0.478182
SNAIL	20.6527	0.495989	44	33	1266.29	0.371712
SNAIL	26.5829	0.495725	12	10.5	518.302	0.486661
SNAIL	23.1799	0.310184	3.5	2	1199.31	0.287764
SNAIL	13.2073	0.400487	3.5	2	508.687	0.375423
SNAIL	17.7339	0.243186	16	4	831.163	0.430613
SNAIL	21.9382	0.294626	4.5	3.5	23.6252	0.997707
SNAIL	19.6416	0.325726	25.5	22	926.576	0.532868
SNAIL	23.2895	0.402756	8	6.5	187.718	0.65207
SNAIL	22.5394	0.301521	11.5	7.5	790.273	0.440031
SNAIL	18.4033	0.318366	6	2.5	25.5814	0.920333
SNAIL	20.6527	0.263069	48.5	29.5	2549.07	0.328153
SNAIL	22.4261	0.593427	43	29.5	907.374	0.343839
SNAIL	12.8159	0.400367	20	21	1213.93	0.353857
SNAIL	17.948	0.226534	4.5	2	217.11	0.603824
SNAIL	13.2554	0.199127	17.5	5.5	1243.49	0.396788
SNAIL	20.9891	0.258858	7.5	3	93.0387	0.771208
SNAIL	19.8351	0.374255	61.5	21	304.769	0.743508
SNAIL	30.6537	0.317566	6	6	185.573	0.690909
SNAIL	23.5882	0.224143	6.5	5	1120	0.406123
SNAIL	17.1499	0.191217	10.5	6	989.211	0.464044
SNAIL	23.0421	0.322268	41.5	18.5	410.928	0.675814
SNAIL	16.4682	0.229424	5.5	2	57.6721	0.818461
SNAIL	19.4134	0.173434	80.5	4.5	160.845	0.758886
SNAIL	19.8351	0.347217	35.5	16	159.123	0.810698
SNAIL	21.11	0.343078	30.5	17.5	1941.67	0.297933
SNAIL	13.0619	0.295792	81	31.5	1456.18	0.470049
SNAIL	23.1524	0.32275	30	21	1939.03	0.285602
SNAIL	20.9891	0.310003	32	34.5	2043.28	0.342426
SNAIL	20.3108	0.351189	25.5	9.5	1502.25	0.288346
SNAIL	13.2073	0.529599	14.5	10	974.601	0.347203
SNAIL	6.57952	0.293454	254	34	2363.82	0.317856
SNAIL	19.6091	0.114639	19.5	6	3589.16	0.235326
SNAIL	22.7921	0.445834	17.5	11	204.463	0.717451
SNAIL	22.8201	0.321244	13.5	8.5	397.795	0.588134
SNAIL	21.9672	0.34342	12.5	7.5	1725.77	0.256517
SNAIL	15.5945	0.363991	40.5	21.5	862.193	0.450786
SNAIL	19.1492	0.25257	12.5	5.5	1558.46	0.331497
SNAIL	32.6451	0.35067	86	89.5	4558.54	0.00869019
SNAIL	23.3986	0.38125	17	13	984.927	0.382301
SNAIL	19.3805	0.229669	17	6	1646.23	0.356611
SNAIL	17.4808	0.178649	22	4	2538.26	0.26976
SNAIL	22.3693	0.358313	19.5	14.5	1683.15	0.314785
SNAIL	12.9641	0.267702	12	7.5	1906.02	0.266478
SNAIL	23.6152	0.354422	8.5	3	139.074	0.642769
SNAIL	20.6835	0.354392	5.5	2.5	368.696	0.470224
SNAIL	17.6619	0.319767	14.5	4.5	147.893	0.717585
SNAIL	21.2603	0.383199	30.5	17.5	123.534	0.92105
SNAIL	22.1404	0.503885	33.5	16.5	900.287	0.372099
SNAIL	19.0826	0.252431	16.5	4.5	755.088	0.460665
SNAIL	18.5412	0.307673	15	6	758.413	0.435825
SNAIL	20.7757	0.282809	44	22	1353.55	0.449012
SNAIL	18.4033	0.239919	3.5	2	676.517	0.424806
SNAIL	24.4106	0.406299	19.5	11.5	460.827	0.54428
SNAIL	19.3147	0.280816	10	3.5	503.733	0.48478
SNAIL	12.2573	0.286776	4	4	102.477	0.74506
SNAIL	24.2273	0.459303	44.5	32	1573.65	0.333996
SNAIL	22.5676	0.312449	70.5	61.5	2951.81	0.290169
SNAIL	19.0492	0.375793	19	5.5	1727.86	0.267633
SNAIL	13.9573	0.331838	28.5	15.5	718.096	0.497905
SNAIL	20.9283	0.400275	40	24.5	1624.02	0.31008
SNAIL	21.9672	0.352911	11	7.5	751.107	0.402518
SNAIL	19.6416	0.229778	7.5	2	131.144	0.680158
SNAIL	18.5412	0.231912	9.5	3.5	2122.87	0.247787
SNAIL	19.2817	0.312273	11.5	6.5	3187.45	0.156061
[truncated: 2,998 more rows]

## Sheet: MDA HM ISO
Cell Line	Diameter	Strain	Transit Time	Entry Time	Elastic Modulus	Beta
	um	-	ms	ms	Pa	-
Control	23.2895	0.268715	38.3333	25	420.122	0.740302
Control	24.3322	0.486644	63.3333	48.3333	1360.51	0.366971
Control	29.2292	0.543352	266.667	158.333	2946.25	0.17157
Control	31.0868	0.529889	8.33333	8.33333	617.161	0.421628
Control	20.2795	0.50983	6.66667	51.6667	2466.71	0.380113
Control	25.7557	0.327392	11.6667	8.33333	530.78	0.522055
Control	25.5074	0.50619	13.3333	8.33333	288.124	0.56671
Control	21.0496	0.245124	11.6667	6.66667	124.321	0.850561
Control	21.7048	0.315173	16.6667	10	589.953	0.528332
Control	23.3713	0.249661	15	10	165.522	0.862577
Control	21.1703	0.274122	60	55	4624.07	0.237206
Control	21.1402	0.229074	20	15	652.731	0.629653
Control	34.0763	0.447588	5	13.3333	2118.49	0.179264
Control	22.2265	0.190381	35	28.3333	7797.59	0.115521
Control	26.0017	0.528623	5	8.33333	123.375	0.734604
Control	23.3713	0.275702	20	16.6667	1960.67	0.344364
Control	26.1482	0.272942	10	6.66667	444.133	0.489121
Control	23.5342	0.722234	6.66667	48.3333	262.731	0.938822
Control	31.4937	0.0738912	198.333	238.333	3877.57	0.0663569
Control	20.6219	0.251156	11.6667	11.6667	1588.26	0.365845
Control	18.1595	0.192082	13.3333	8.33333	1006.19	0.478102
Control	21.0496	0.234162	13.3333	10	388.883	0.674563
Control	25.5323	0.361081	70	81.6667	3792.93	0.172583
Control	24.3584	0.317749	448.333	506.667	5794.31	0.256117
Control	21.8218	0.236648	15	13.3333	682.468	0.574684
Control	21.3797	0.210135	13.3333	11.6667	1097.21	0.491086
Control	20.0267	0.18955	50	38.3333	5261.2	0.225656
Control	23.8299	0.316561	213.333	235	5429.21	0.204706
Control	21.5281	0.221539	16.6667	15	1658.64	0.412708
Control	22.7362	0.261466	13.3333	16.6667	1111.48	0.451175
Control	21.4985	0.271653	201.667	205	7919.95	0.125517
Control	22.4261	0.289762	23.3333	28.3333	4577.73	0.134365
Control	20.9891	0.237012	28.3333	25	2689.17	0.323405
Control	26.1969	0.281193	6.66667	6.66667	251.661	0.671323
Control	30.0454	0.405452	693.333	25	720.129	0.545893
Control	22.6239	0.313735	526.667	435	5903.23	0.132342
Control	21.0799	0.417963	135	128.333	3143.82	0.429131
Control	19.2487	0.190616	10	8.33333	1994.35	0.34935
Control	26.1726	0.431143	5	6.66667	445.515	0.480111
Control	20.8369	0.206558	15	11.6667	719.453	0.569524
Control	23.8299	0.321139	10	6.66667	1509.62	0.311226
Control	37.3219	0.611191	150	196.667	3589.49	0.221607
Control	23.0698	0.240345	6.66667	10	319.728	0.701519
Control	20.8979	0.311757	46.6667	40	2865.04	0.322076
Control	24.7473	0.301294	1020	966.667	6513.13	0.207125
Control	19.4788	0.235795	13.3333	15	605.282	0.643476
Control	19.9949	0.407611	6.66667	41.6667	4223.84	0.107601
Control	18.9823	0.217743	105	90	6026.44	0.150931
Control	25.7063	0.449585	15	11.6667	289.349	0.636196
Control	27.5241	0.300999	210	200	5079.7	0.192053
Control	26.1482	0.459153	5	11.6667	436.003	0.535504
Control	31.9951	0.13207	26.6667	6.66667	4842.88	0.0996746
Control	26.2454	0.47009	536.667	348.333	5678.52	0.143435
Control	21.0194	0.29782	6.66667	6.66667	55.211	0.962791
Control	22.1691	0.327293	3440	2540	8319.32	0.246672
Control	20.8063	0.262811	13.3333	10	104.959	0.931977
Control	21.11	0.23962	20	10	264.405	0.742883
Control	17.8055	0.204343	15	8.33333	673.123	0.582417
Control	20.745	0.284546	15	15	3228.68	0.17825
Control	30.1934	0.592769	30	20	967.291	0.34923
Control	32.6061	0.570185	28.3333	126.667	1909.95	0.35333
Control	26.7023	0.543111	11.6667	10	61.3295	0.893622
Control	18.78	0.222868	11.6667	6.66667	1842.64	0.327854
Control	30.0242	0.39478	46.6667	51.6667	1854.05	0.334562
Control	30.6952	0.446315	26.6667	25	621.755	0.558574
Control	20.0267	0.21582	10	6.66667	440.416	0.609834
Control	21.0496	0.292408	13.3333	10	663.891	0.520993
Control	27.8461	0.581516	5	83.3333	3773.93	0.0442513
Control	24.201	0.372584	6.66667	6.66667	234.072	0.617417
Control	29.5109	0.427342	46.6667	55	2683.79	0.248117
Control	20.1851	0.257601	20	16.6667	2565.35	0.271899
Control	28.479	0.371014	6.66667	10	465.713	0.532401
Control	20.0902	0.536011	110	103.333	5101.54	0.207385
Control	21.11	0.202222	8.33333	6.66667	239.768	0.734846
Control	23.3986	0.2578	140	141.667	5107.29	0.22045
Control	21.1402	0.276068	38.3333	26.6667	434.235	0.775378
Control	32.567	0.621828	8.33333	6.66667	463.323	0.387078
Control	32.0746	0.214889	6.66667	11.6667	1934.67	0.19306
Control	31.655	0.397704	16.6667	65	3409.83	0.149935
Control	30.8607	0.389453	11.6667	11.6667	1049.97	0.374972
Control	23.8299	0.291011	141.667	148.333	4552.84	0.258638
Control	21.8218	0.226343	8.33333	6.66667	801.932	0.490206
Control	19.0158	0.209942	13.3333	8.33333	242.394	0.766684
Control	17.6619	0.231061	16.6667	6.66667	519.372	0.57577
Control	32.8201	0.503553	18.3333	23.3333	1022.19	0.370467
Control	20.7757	0.44378	353.333	303.333	5375.87	0.030995
Control	22.1691	0.280884	21.6667	20	1513.37	0.419657
Control	19.9949	0.207316	15	10	577.031	0.604178
Control	22.6239	0.370859	8.33333	6.66667	399.895	0.512427
Control	19.7063	0.245124	6.66667	6.66667	443.225	0.585161
Control	25.6567	0.0486288	8.33333	11.6667	1949.19	0.255044
Control	27.4778	0.399958	11.6667	13.3333	679.735	0.467634
Control	21.6755	0.223959	6.66667	6.66667	330.646	0.647283
Control	19.8992	0.254997	25	15	1604.73	0.384451
Control	27.0576	0.38081	6.66667	8.33333	677.628	0.439468
Control	24.6442	0.330702	30	23.3333	1525.48	0.3715
Control	23.3168	0.492046	31.6667	66.6667	5405.54	0.00520205
Control	21.7341	0.244517	65	60	2964.86	0.367694
Control	16.3128	0.0534438	6.66667	38.3333	438.445	0.903298
Control	24.6958	0.365996	51.6667	55	2630.42	0.265482
Control	18.8138	0.223007	236.667	206.667	7138.23	0.172141
Control	21.5281	0.244577	13.3333	11.6667	948.945	0.487947
Control	21.3499	0.204363	10	8.33333	563.261	0.608524
Control	30.0242	0.442609	855	786.667	5009.35	0.150516
Control	21.4985	0.207668	10	6.66667	96.1479	0.933014
Control	19.6091	0.223738	15	10	2810.14	0.267691
Control	22.4828	0.210521	20	13.3333	894.375	0.562553
Control	27.0576	0.473093	5	6.66667	134.593	0.689909
Control	21.11	0.392559	6.66667	18.3333	872.846	0.450159
Control	25.4324	0.351848	5	8.33333	621.65	0.46683
Control	19.7386	0.22879	36.6667	26.6667	5626.12	0.156423
Control	17.8412	0.360265	11.6667	20	1362.39	0.3491
Control	20.8674	0.24276	35	31.6667	4680.97	0.162751
Control	17.4078	0.139003	18.3333	11.6667	675.612	0.641709
Control	32.4495	0.452588	16.6667	90	3435.62	0.132342
Control	31.2298	0.426304	30	31.6667	2389.83	0.221236
Control	26.6068	0.432775	10	8.33333	1630.05	0.232013
ISO	20.745	0.22195	58.3333	48.3333	1975.59	0.52378
ISO	19.4788	0.271588	51.6667	56.6667	935.616	0.723298
ISO	22.2551	0.234485	115	66.6667	4534.42	0.257129
ISO	20.3734	0.228657	48.3333	30	1944.65	0.449015
ISO	23.3713	0.314034	20	16.6667	1044.41	0.44745
ISO	35.0706	0.523431	21.6667	41.6667	753.986	0.506134
ISO	20.7143	0.266832	15	8.33333	1688.16	0.326097
ISO	19.0158	0.354126	308.333	230	9905.35	0.0412382
ISO	21.6755	0.199691	110	71.6667	6342.17	0.208603
ISO	19.7386	0.538166	70	61.6667	937.029	0.506312
ISO	22.1978	0.221141	118.333	100	4304.98	0.342904
ISO	23.696	0.39145	215	196.667	7765.49	0.189888
ISO	23.6422	0.504996	185	178.333	3994.49	0.187733
ISO	19.803	0.168693	41.6667	13.3333	474.714	0.702314
ISO	25.0541	0.350664	11.6667	15	1573.97	0.30126
ISO	22.3692	0.233245	118.333	30	2408.07	0.396755
ISO	23.8032	0.292867	26.6667	30	2326.72	0.293544
ISO	23.9099	0.388391	20	11.6667	142.58	0.874382
ISO	25.2061	0.327324	13.3333	8.33333	131.55	0.813017
ISO	21.7926	0.612585	368.333	338.333	8477.52	0.167798
ISO	26.2939	0.0234081	100	48.3333	2166.97	0.255621
ISO	19.6091	0.234754	421.667	125	8109.55	0.0186234
ISO	17.4808	0.526155	30	16.6667	70.1124	0.972545
ISO	20.8369	0.222868	656.667	248.333	5270.35	0.37055
ISO	18.9151	0.246168	8.33333	6.66667	1335.94	0.378977
ISO	28.7681	0.270774	153.333	105	7095.71	0.148165
ISO	20.8979	0.279592	253.333	223.333	5505.11	0.244259
ISO	19.7386	0.265669	90	55	3409.24	0.322144
ISO	25.2061	0.258166	173.333	148.333	2502.98	0.245321
ISO	23.9631	0.254316	950	633.333	7745.88	0.14048
ISO	21.6461	0.220178	176.667	141.667	6602.85	0.169284
ISO	24.6183	0.339182	13.3333	13.3333	484.655	0.591807
ISO	21.3201	0.317622	53.3333	40	2647.5	0.316939
ISO	21.11	0.197782	10	8.33333	3209.78	0.23888
ISO	21.6166	0.162757	16.6667	10	8527.89	0.0354579
ISO	20.0267	0.205181	65	51.6667	6552.57	0.165126
ISO	19.9311	0.360521	750	250	4599.74	0.127091
ISO	21.6755	0.504267	30	28.3333	1326.39	0.495152
ISO	22.1691	0.250849	20	20	203.805	0.948481
ISO	26.3906	0.464103	5130	120	2652.84	0.246559
ISO	24.4106	0.394157	155	101.667	4215.32	0.192913
ISO	20.1219	0.258339	21.6667	15	900.112	0.50477
ISO	19.9311	0.222868	43.3333	31.6667	1644.32	0.550415
ISO	20.56	0.220909	276.667	220	9361.32	0.0971224
ISO	21.0799	0.233741	133.333	95	3988.6	0.383219
ISO	17.7697	0.248134	6378.33	4933.33	9957.04	0.0507599
ISO	18.8476	0.121476	178.333	66.6667	5851.45	0.305351
ISO	18.3687	0.28258	26.6667	15	873.082	0.553486
ISO	20.2795	0.23865	71.6667	50	2278.29	0.480037
ISO	24.8243	0.437553	26.6667	30	952.89	0.499917
ISO	19.7708	0.217098	16.6667	10	186.713	0.866926
ISO	22.1404	0.2752	6.66667	6.66667	127.649	0.828506
ISO	20.1535	0.337485	25	11.6667	269.597	0.619235
ISO	25.6318	0.381431	115	161.667	4055.73	0.185936
ISO	21.6461	0.266356	125	111.667	4116.46	0.283592
ISO	21.1703	0.27195	53.3333	45	2492.7	0.368056
ISO	15.9975	0.231581	31.6667	16.6667	844.288	0.567721
ISO	20.0902	0.272852	71.6667	50	1343.57	0.623674
ISO	19.2156	0.277633	11.6667	8.33333	533.313	0.560413
ISO	23.1799	0.327351	13.3333	15	165.95	0.854432
ISO	22.0251	0.279361	101.667	66.6667	2763.16	0.409212
ISO	21.4095	0.325651	26.6667	15	1337.12	0.379763
ISO	19.3477	0.240672	25	11.6667	850.968	0.522298
ISO	19.9311	0.280706	256.667	188.333	6022.32	0.185897
ISO	24.306	0.211889	85	71.6667	8871.66	0.045158
ISO	18.334	0.281966	20	10	236.128	0.746601
ISO	27.6395	0.578398	6.66667	8.33333	175.434	0.63858
ISO	23.2347	0.480612	28.3333	30	1017.88	0.412593
ISO	21.5577	0.292408	631.667	533.333	6458.39	0.251637
ISO	24.3584	0.204555	103.333	70	3314.48	0.380031
ISO	24.7215	0.486176	131.667	111.667	3955.19	0.157925
ISO	21.9672	0.205708	196.667	171.667	5674.1	0.350398
ISO	23.4258	0.32901	10548.3	2215	7409.39	0.205072
ISO	22.3692	0.0925572	5	36.6667	3562.46	0.296911
ISO	18.5755	0.2181	38.3333	26.6667	2419.39	0.368991
ISO	19.4134	0.189186	33.3333	15	13250.7	0.0465572
ISO	19.4788	0.228657	15	6.66667	817.331	0.497336
ISO	23.1249	0.503107	5	30	1470.25	0.376248
ISO	18.0541	0.220751	15	11.6667	2476.1	0.303956
ISO	16.7366	0.134348	26.6667	20	2520.61	0.353838
ISO	21.0496	0.405489	53.3333	53.3333	3424.98	0.210259
ISO	17.4078	0.225303	28.3333	16.6667	2795.07	0.307837
ISO	26.0507	0.618081	10	11.6667	158.134	0.721512
ISO	20.7143	0.348575	131.667	180	5425.07	0.125767
ISO	17.5897	0.401315	23.3333	13.3333	221.836	0.812106
ISO	23.2895	0.394498	70	128.333	4660.54	0.0970981
ISO	33.0521	0.514449	66.6667	80	2606.15	0.199136
ISO	32.5083	0.567603	16.6667	41.6667	6415.94	0.00182539
ISO	22.5111	0.447332	71.6667	63.3333	5055.87	0.138095
ISO	21.4095	0.282657	88.3333	80	3658.51	0.246084
ISO	21.7048	0.196586	245	221.667	7406.87	0.225813
ISO	24.5406	0.335766	23.3333	26.6667	2718.87	0.209562
ISO	21.4689	0.317982	133.333	125	4408.56	0.232344
ISO	22.5111	0.258061	56.6667	63.3333	4013.06	0.23583
ISO	19.116	0.211049	126.667	76.6667	4348.6	0.28457
ISO	21.0799	0.236902	231.667	253.333	7154.67	0.0364706
ISO	23.0422	0.652824	13.3333	11.6667	300.062	0.529988
ISO	16.5453	0.247223	5	36.6667	6633.56	0.0650199
ISO	21.8218	0.271273	53.3333	53.3333	3832.04	0.1988
ISO	18.4379	0.24708	21.6667	18.3333	2538.94	0.319223
ISO	20.1219	0.326735	51.6667	33.3333	2279.57	0.348272
ISO	17.1499	0.18529	21.6667	8.33333	1083.04	0.459478
ISO	19.0492	0.398435	16.6667	10	672.25	0.465895
ISO	19.4461	0.294775	20	15	1042.73	0.500555
ISO	21.5577	0.282908	28.3333	23.3333	2698.71	0.250278
ISO	19.2156	0.191262	31.6667	23.3333	2221.83	0.419058
ISO	18.9823	0.223468	20	8.33333	526.798	0.613386
ISO	24.9267	0.30077	56.6667	63.3333	5389.81	0.0706106
ISO	17.948	0.129657	16.6667	11.6667	7541.11	0.0947247
ISO	19.6091	0.191742	13.3333	8.33333	1882.63	0.361625
ISO	19.0158	0.19664	28.3333	21.6667	5312.32	0.172043
ISO	21.0799	0.177685	40	23.3333	2047.92	0.396754
ISO	25.9282	0.446054	15	16.6667	899.306	0.420338
ISO	24.306	0.293838	38.3333	43.3333	6007.58	0.0360288
ISO	25.2817	0.354233	91.6667	93.3333	4407.73	0.109548
ISO	29.1856	0.726525	138.333	16.6667	109.79	0.846633
ISO	21.3797	0.166938	46.6667	30	8390.03	0.113304
ISO	21.7634	0.574169	20	10	270.831	0.658984
